# Supplementary material for: Comparative Proteomic Analysis Reveals Novel Insights into the Interaction between Rice and Xanthomonas oryzae pv. oryzae
Source: Research Square preprint supplement (doi:10.21203/rs.3.rs-41837/v2), 2020-10-16
Supplement: Supplementary file 1 [file 0111b6df7c0a887ae7e9ab20.xlsx]

## Sheet: Rice
Additional file 1. The identified rice proteins of two genotypes at two time points after inoculation of PXO99A.
Accession ID	RAP Locus	MSU_ID	Coverage (%)	No. of proteins	No. of unique peptides	No. of peptides	No. of peptide-spectrum matching	No. of AAs	Molecular weight (kDa)	calc. pI
11466848	psaC	---	90.12	1	9	9	251	81	8.89313	6.91748
297724149	Os05g0429600	LOC_Os05g35470	87.65	1	5	5	14	81	8.57724	5.70654
11466794	atpB	---	82.13	1	12	30	2649	498	53.9802	5.61768
115435500	Os01g0233000	LOC_Os01g13210	81.37	1	19	19	104	204	21.7875	4.91943
115452105	Os03g0265900	LOC_Os03g15920	80.25	1	9	9	40	162	17.7832	5.021
115468886	Os06g0608700	LOC_Os06g40640	79.89	1	20	25	349	358	37.7307	7.72314
297612474	Os11g0707000	---	79.71	1	29	30	3080	350	38.8804	7.7085
115452789	Os03g0327600	---	79.6	1	18	24	110	348	38.7978	6.80029
115479853	Os09g0485900	LOC_Os09g31180	79.47	2	14	15	68	190	21.3354	9.61279
115488144	Os12g0274700	---	78.86	2	22	24	5167	175	19.6339	8.86572
115455221	Os03g0738400	LOC_Os03g52840	78.75	1	30	30	571	513	56.3798	8.33838
115488282	Os12g0405700	---	77.08	1	6	6	24	48	5.53878	9.5249
115486573	Os11g0671000	---	76	1	5	5	13	125	13.5648	9.45166
115436314	Os01g0328400	LOC_Os01g22490	75.48	11	3	13	310	155	17.6574	9.77393
115459954	Os04g0566000	---	75.47	1	5	5	8	106	11.2997	8.55811
115470941	Os07g0186000	---	75.41	1	10	10	82	122	13.1477	5.30029
115459078	Os04g0486600	LOC_Os04g40950	74.78	2	7	22	241	337	36.7499	6.81494
115474137	Os07g0683900	LOC_Os07g48490	74.34	1	19	23	99	343	38.5039	7.26904
115474531	Os08g0117400	LOC_Os08g02420	74.32	1	10	10	31	148	16.6725	5.05908
115476002	Os08g0344300	LOC_Os08g25590	74.31	2	3	8	23	109	12.2302	9.49561
115482426	Os10g0466700	---	74.29	1	9	9	58	140	15.021	10.3892
115474601	Os08g0126300	LOC_Os08g03290	74.18	1	9	21	280	337	36.3898	7.10791
115461741	Os05g0116100	LOC_Os05g02530	74.18	1	12	14	113	213	23.5552	6.21436
115453593	Os03g0424500	---	73.97	2	13	14	86	146	16.3766	10.0376
115444771	Os02g0192700	LOC_Os02g09940	73.78	2	11	12	229	225	23.1651	6.58057
115469944	Os06g0714100	LOC_Os06g50000	73.45	1	8	8	25	113	13.1777	8.42627
115471895	Os07g0449100	LOC_Os07g26700	73.39	2	1	6	20	109	12.1592	9.49561
115467820	Os06g0320000	LOC_Os06g21550	73.38	1	10	10	23	139	15.2227	5.10986
115484359	Os11g0167800	LOC_Os11g06720	73.19	1	7	7	68	138	15.4555	6.69775
115443619	Os02g0101500	LOC_Os02g01150	73.06	1	24	24	267	386	42.0479	7.02002
115444481	Os02g0169300	LOC_Os02g07260	72.89	1	14	28	356	402	42.0815	5.85889
297597744	Os01g0783600	LOC_Os01g57460	72.62	1	5	5	7	84	9.47187	5.24951
115451597	Os03g0219200	LOC_Os03g11960	72.22	1	6	7	41	162	16.3052	7.35693
115434516	Os01g0147900	LOC_Os01g05490	71.94	1	14	16	231	253	27.046	5.49072
115438793	Os01g0639900	LOC_Os01g45274	71.53	2	21	22	1602	281	30.0183	8.49951
115488160	Os12g0277500	LOC_Os12g17910	71.45	1	32	36	332	578	61.0926	5.21143
115464893	Os05g0516600	LOC_Os05g44050	71.36	1	6	13	39	206	22.9814	5.50342
115459618	Os04g0533300	LOC_Os04g45070	71.36	1	17	17	135	206	22.4017	5.50342
115452337	Os03g0285700	LOC_Os03g17690	71.2	1	12	15	99	250	27.1387	5.65576
115460656	Os04g0623800	LOC_Os04g53230	71.08	1	27	27	389	408	43.9405	8.30908
115477831	Os08g0560900	LOC_Os08g44680	70.94	1	15	15	474	203	22.0204	9.70068
115461951	Os05g0135700	LOC_Os05g04510	70.45	2	8	19	76	396	43.1929	6.13818
115482724	Os10g0496900	LOC_Os10g35370	70.14	1	17	17	108	288	31.3568	6.63916
115439131	Os01g0675100	LOC_Os01g48420	69.75	1	7	7	58	162	17.2801	5.88428
115481540	Os10g0330000	LOC_Os10g18340	69.7	1	12	12	127	165	16.512	4.77979
115445555	Os02g0280500	LOC_Os02g17920	69.51	1	4	5	40	82	8.9766	4.48779
11466826	rpl14	---	69.11	1	7	8	39	123	13.5563	8.29443
115460332	Os04g0601700	LOC_Os04g51270	69.09	1	8	8	29	110	12.2674	8.49951
115452321	Os03g0284400	LOC_Os03g17580	69.09	1	14	14	52	220	24.2058	9.18799
115446975	Os02g0586400	LOC_Os02g37420	69.05	1	5	12	60	210	23.0024	7.41553
115472365	Os07g0516200	LOC_Os07g33240	68.89	1	14	14	74	180	18.8059	9.39307
115481260	Os10g0167300	LOC_Os10g08550	68.83	1	8	26	197	446	47.8844	5.69385
115455167	Os03g0735000	LOC_Os03g52460	68.49	3	31	31	206	511	55.3923	7.37158
115471123	Os07g0208000	LOC_Os07g10720	68.46	2	9	9	49	130	14.7909	9.93506
115482934	Os10g0516100	LOC_Os10g37180	68.29	1	7	7	401	164	17.3566	5.03369
115481984	Os10g0411800	LOC_Os10g27190	68.09	1	6	11	52	141	16.4187	10.1401
115460394	Os04g0605900	LOC_Os04g51630	68.03	5	7	20	81	244	28.3435	10.0376
115453877	Os03g0577000	---	67.98	1	5	16	93	228	25.4186	9.5249
115436780	Os01g0501800	LOC_Os01g31690	67.87	1	22	22	1561	333	34.8397	6.31592
115475427	Os08g0234000	LOC_Os08g13690	67.76	5	8	21	83	245	28.4356	10.0522
11466795	rbcL	---	67.51	3	9	45	21322	477	52.8475	6.68311
115457390	Os04g0235600	LOC_Os04g16748/LOC_Os10g21238/LOC_Os10g38272	67.38	2	10	10	83	141	16.4137	9.33447
115474285	Os07g0694700	LOC_Os07g49400	67.33	3	12	15	193	251	27.1006	5.36377
115485299	Os11g0432400	LOC_Os11g24450/LOC_Os11g25030	67.31	2	9	16	118	309	32.5508	9.37842
115456519	Os03g0843100	LOC_Os03g62600	67.26	3	9	13	32	223	24.4676	7.28369
115451911	Os03g0248600	LOC_Os03g14450	67.19	1	6	23	144	445	47.9424	5.46533
115456862	Os04g0111200	LOC_Os04g02050	67.11	1	13	17	95	225	24.9387	8.55811
11466784	atpA	---	66.86	2	31	35	3249	507	55.6305	6.25244
115476908	Os08g0478200	LOC_Os08g37320	66.86	1	13	13	67	169	19.7129	5.26221
115482032	Os10g0417600	LOC_Os10g28200	66.67	1	13	25	128	378	42.7509	6.0874
115470621	Os07g0152900	LOC_Os07g05820	66.67	2	15	22	559	369	40.2192	8.48486
115449791	Os02g0821800	LOC_Os02g57590/LOC_Os05g08360	66.67	1	4	4	10	87	9.52786	8.48486
115449183	Os02g0793700	LOC_Os02g55060	66.67	1	7	7	35	102	10.8194	5.51611
115482210	Os10g0442600	LOC_Os10g30580	66.5	1	3	11	39	203	22.7144	4.95752
115482382	Os10g0462900	LOC_Os10g32550	66.2	2	12	36	185	574	60.812	5.87158
115464595	Os05g0490100	LOC_Os05g41110	66.07	2	5	7	29	112	12.3525	9.5542
115448091	Os02g0698000	LOC_Os02g47020	66	1	16	20	752	403	44.8367	6.02393
115470235	Os07g0108300	LOC_Os07g01760	65.77	1	28	28	493	485	53.6213	7.89893
115484401	Os11g0171300	LOC_Os11g07020	65.72	2	27	28	2693	388	41.9795	6.80029
115466004	Os06g0114000	LOC_Os06g02380	65.72	1	27	39	388	601	64.0459	5.66846
115439561	Os01g0714900	LOC_Os01g51700	65.7	1	6	12	26	207	23.2466	5.98584
115455637	Os03g0773800	LOC_Os03g56280	65.54	1	16	20	250	354	36.9993	7.95752
115489664	Os12g0625000	LOC_Os12g42980	65.42	1	14	17	145	321	33.8167	5.42725
115463001	Os05g0291700	LOC_Os05g22614	65.29	1	29	29	197	484	51.1905	5.8335
115434044	Os01g0106900	LOC_Os01g01710	64.9	1	24	24	82	473	51.4408	6.17627
115489714	Os12g0632000	LOC_Os12g43600	64.81	1	5	8	71	162	16.0734	6.7417
115476928	Os08g0480800	LOC_Os08g37490	64.77	1	10	17	89	264	28.9824	4.94482
115442595	Os01g0978100	LOC_Os01g74650	64.72	1	17	21	235	394	41.7617	6.69775
115464675	Os05g0496200	LOC_Os05g41640	64.64	1	9	11	839	181	18.4856	4.4751
115441459	Os01g0882500	LOC_Os01g66000	64.45	1	13	13	74	211	23.5803	8.96826
115469436	Os06g0668200	LOC_Os06g45710	64.34	1	14	26	547	401	42.2525	6.60986
115456685	Os03g0855600	LOC_Os03g63860	64.29	1	13	13	55	224	24.2195	9.23193
115480571	Os09g0553200	LOC_Os09g38030	63.97	1	19	25	221	469	51.6502	5.59229
115452301	Os03g0283100	---	63.93	2	14	14	58	244	27.344	5.52881
115476520	Os08g0430500	LOC_Os08g33370	63.67	1	9	18	97	256	28.8084	4.84326
297596558	Os01g0284700	LOC_Os01g18210	63.64	1	3	3	19	55	6.15504	5.21143
115468476	Os06g0551400	---	63.59	3	5	13	38	217	23.9081	5.73193
115473973	Os07g0669100	LOC_Os07g47290	63.47	1	25	25	97	479	53.4607	5.65576
22417465	rps19	---	63.44	1	7	7	37	93	10.6887	10.2866
115485231	Os11g0312400	LOC_Os11g20790	63.37	1	12	17	64	243	26.658	7.79639
115450493	Os03g0129300	LOC_Os03g03720	63.29	1	19	27	1661	444	47.0813	6.68311
297611035	Os11g0104900	LOC_Os11g01380/LOC_Os12g01390	63.27	1	3	3	9	49	5.59888	7.12256
115473665	Os07g0641700	LOC_Os07g44740	63.27	1	6	7	21	98	10.637	8.39697
115455773	Os03g0786100	LOC_Os03g57220	63.14	2	13	20	584	369	40.3581	8.47021
115477633	Os08g0545200	LOC_Os08g43190	62.87	1	16	16	94	369	39.306	6.46826
115441343	Os01g0873100	LOC_Os01g65260	62.86	1	3	4	8	105	11.5328	4.90674
115451757	Os03g0234200	LOC_Os03g13170	62.79	13	2	9	301	129	14.775	9.92041
115454751	Os03g0695600	LOC_Os03g48930	62.74	1	11	11	46	212	23.4629	5.64307
115466224	Os06g0133800	LOC_Os06g04270	62.54	1	27	30	1344	678	73.4028	5.66846
115446541	Os02g0537700	LOC_Os02g33450	62.45	2	17	17	451	261	28.0794	5.99854
297596049	Os01g0135700	LOC_Os01g04330	62.43	1	9	9	21	181	19.2511	4.58936
115436320	Os01g0328700	LOC_Os01g22520	62.43	1	24	25	262	503	52.6097	7.53271
297596864	Os01g0505400	LOC_Os01g32080	62.39	1	9	9	22	117	13.0037	8.36768
11466790	ndhJ	---	62.26	1	9	9	42	159	18.7713	6.27783
115438939	Os01g0654500	LOC_Os01g46610	62.14	2	18	26	128	412	46.0135	6.80029
11466811	rpl33	---	62.12	1	6	6	39	66	7.63803	10.1694
115438819	Os01g0642200	LOC_Os01g45470	62.07	1	4	4	13	58	5.91943	10.4331
115473889	Os07g0662500	LOC_Os07g46750	62.05	1	9	10	72	224	23.785	4.76709
115448105	Os02g0699600	LOC_Os02g47140	62.05	2	9	9	55	166	17.7056	9.15869
115486269	Os11g0615700	LOC_Os11g40140	62.03	1	12	12	44	237	25.977	4.75439
297603882	Os05g0160200	LOC_Os05g06770	61.94	11	1	11	308	155	17.6715	9.80322
115484585	Os11g0199200	LOC_Os11g09280	61.91	1	34	36	174	512	56.8191	5.12256
115461925	Os05g0133100	LOC_Os05g04220	61.79	1	12	12	31	212	22.6869	9.90576
115479033	Os09g0400000	---	61.77	3	16	16	66	361	37.7358	6.59521
115447567	Os02g0644100	LOC_Os02g43020	61.76	3	35	35	105	578	64.8737	6.37939
115472641	Os07g0546000	LOC_Os07g36190	61.76	1	8	12	51	238	27.3237	5.021
297602438	Os04g0310500	LOC_Os04g24520	61.62	1	5	6	18	99	11.0438	9.24658
115472057	Os07g0476900	LOC_Os07g29410	61.46	1	15	15	57	301	32.1352	6.72705
115489150	Os12g0567700	LOC_Os12g38000	61.3	1	16	16	160	261	28.2319	10.9897
115435932	Os01g0276000	LOC_Os01g16890	61.26	1	5	7	33	111	12.3555	9.5835
115470791	Os07g0171100	LOC_Os07g07540	61.19	1	16	16	86	219	25.1777	7.10791
115470082	Os06g0728000	LOC_Os06g51220	61.15	1	12	12	96	157	17.0896	5.94775
115477809	Os08g0559200	LOC_Os08g44480	61.11	2	4	8	26	108	12.0606	10.5649
115470529	Os07g0141400	---	61.02	2	14	14	874	254	26.9227	8.49951
115447367	Os02g0621700	LOC_Os02g40830	60.9	1	28	28	134	422	45.0627	6.31592
115465515	Os05g0568300	LOC_Os05g49320	60.89	1	5	10	92	179	18.1977	6.34131
115471261	Os07g0229900	LOC_Os07g12650	60.87	1	1	8	47	138	14.7695	5.51611
297724577	Os06g0197500	---	60.78	1	2	11	70	204	21.7925	6.07471
115444057	Os02g0133800	LOC_Os02g04100	60.74	1	15	16	55	270	29.6117	5.5415
115451377	Os03g0200500	LOC_Os03g10340	60.69	1	4	16	101	262	29.7088	9.80322
115451401	Os03g0202200	LOC_Os03g10510	60.65	1	16	16	77	277	29.4565	9.17334
11466803	petA	---	60.62	3	21	21	337	320	35.4448	8.90967
297596184	Os01g0170600	---	60.62	1	7	7	13	160	17.274	7.88428
115459660	Os04g0538100	LOC_Os04g45490	60.62	1	21	21	133	386	42.1079	5.66846
115458498	Os04g0435700	LOC_Os04g35570	60.49	1	15	23	80	453	48.1425	5.65576
297721387	Os02g0595700	LOC_Os02g38210	60.39	1	21	22	466	467	50.3818	6.63916
115488288	Os12g0406200	LOC_Os12g21798	60.38	1	2	16	71	260	29.6919	9.80322
115452955	Os03g0343500	LOC_Os03g22340	60.31	1	6	8	57	131	14.4626	9.5542
115461066	Os04g0659100	LOC_Os04g56400	60.28	1	18	19	569	428	46.6134	6.34131
115445869	Os02g0328300	LOC_Os02g22260	60.28	1	13	13	73	287	30.6767	5.68115
115448577	Os02g0739600	LOC_Os02g50620	60.26	1	17	22	94	390	42.6746	7.76709
297612544	Os12g0115500	---	60.22	2	4	5	39	93	9.51591	8.99756
115465942	Os06g0107700	LOC_Os06g01850	60.22	1	17	23	276	362	39.9823	8.51416
115455383	Os03g0751400	LOC_Os03g54040	60.18	1	1	14	87	226	24.9616	9.979
115453077	Os03g0356300	LOC_Os03g24020	60.18	1	1	14	87	226	24.8696	10.0522
115472201	Os07g0496000	LOC_Os07g31370	60.1	1	10	12	43	208	22.9308	7.89893
297598143	Os01g0905800	---	60.06	1	8	23	165	358	38.7992	8.1626
115471119	Os07g0207400	LOC_Os07g10660	60	1	3	10	43	165	17.7205	9.71533
115458768	Os04g0459500	LOC_Os04g38600	59.95	1	16	24	2654	402	42.6891	7.72314
115435424	Os01g0227300	LOC_Os01g12730	59.9	1	4	11	30	207	23.1225	5.51611
115436072	Os01g0293000	LOC_Os01g18860	59.85	2	4	15	69	396	43.2827	5.41455
115449235	Os02g0797500	LOC_Os02g55420	59.83	1	26	26	152	458	50.3186	8.08936
115445597	Os02g0287000	LOC_Os02g18550	59.77	1	6	16	65	261	29.7408	9.83252
115451095	Os03g0178000	LOC_Os03g08010/LOC_Os03g08020/LOC_Os03g08050	59.73	1	23	23	323	447	49.2617	9.05615
115439533	Os01g0711400	LOC_Os01g51410/LOC_Os06g40940	59.73	1	12	42	576	1033	111.356	6.97607
115454901	Os03g0710800	LOC_Os03g50290	59.62	1	7	16	99	260	29.1596	4.88135
115436514	Os01g0358400	LOC_Os01g25610	59.62	1	12	17	124	265	29.7892	10.1255
115448919	Os02g0768600	LOC_Os02g52940	59.52	1	18	18	127	294	32.98	5.8208
115444621	Os02g0180200	LOC_Os02g08380	59.46	1	9	9	44	185	20.1412	7.82568
115477148	Os08g0502700	LOC_Os08g39300	59.45	1	16	16	210	402	44.2381	8.11865
115475151	Os08g0191700	LOC_Os08g09250	59.45	1	14	16	149	291	32.5326	5.66846
115467746	Os06g0308000	LOC_Os06g20320	59.4	1	30	30	137	537	59.894	5.2876
115476618	Os08g0440800	LOC_Os08g34210	59.32	2	26	26	135	499	53.3356	7.00537
115486079	Os11g0591100	LOC_Os11g37890	59.3	1	9	21	105	371	42.1048	6.0874
115452223	Os03g0276500	LOC_Os03g16860	59.23	1	14	41	293	650	71.0559	5.21143
297604951	Os05g0574300	---	59.21	3	2	12	243	152	16.246	10.0522
115477703	Os08g0550500	LOC_Os08g43680	59.21	1	23	23	46	483	50.9999	8.80713
115461669	Os05g0108800	LOC_Os05g01820	59.12	1	4	7	30	137	15.2727	5.32568
297719825	Os01g0271700	---	59.09	1	3	3	4	44	4.70129	5.10986
297606826	Os07g0180900	LOC_Os07g08330	59.06	1	12	22	144	425	46.6652	10.6382
115474635	Os08g0129200	LOC_Os08g03520	58.88	1	7	7	24	197	18.6823	6.75635
115450773	Os03g0151800	LOC_Os03g05730	58.84	1	31	39	149	809	89.6877	5.26221
115488712	Os12g0507200	LOC_Os12g32240	58.75	1	3	8	43	160	17.5457	5.98584
115473151	Os07g0597000	---	58.75	2	2	8	46	160	17.4467	6.20166
297596965	Os01g0542000	LOC_Os01g36090	58.73	1	15	15	46	315	33.2605	5.51611
115471369	Os07g0246200	LOC_Os07g14270	58.73	2	27	27	107	424	48.2792	4.62744
115450191	Os03g0107800	LOC_Os03g01750	58.73	1	4	4	15	63	7.48062	5.0083
115486793	Os11g0703900	LOC_Os11g47760	58.55	2	6	39	335	649	71.1402	5.21143
115466298	Os06g0139900	LOC_Os06g04800	58.54	1	2	13	47	246	26.2431	5.78271
115455195	Os03g0737000	LOC_Os03g52690	58.54	1	9	9	45	205	22.2936	9.15869
115448935	Os02g0770000	LOC_Os02g53060	58.54	1	2	13	49	246	26.2572	5.78271
115464167	Os05g0445500	LOC_Os05g37330	58.41	1	4	4	19	113	11.5918	4.27197
115456247	Os03g0821100	LOC_Os03g60620	58.4	1	7	38	276	649	71.2672	5.21143
115444475	Os02g0168800	LOC_Os02g07230	58.38	1	17	17	52	358	38.3727	7.38623
115473289	Os07g0608500	LOC_Os07g41750	58.37	1	2	13	68	233	25.9828	9.59814
297725773	Os07g0549900	---	58.25	1	7	7	70	103	11.4024	11.4731
115440369	Os01g0784800	LOC_Os01g57570	58.13	1	8	9	65	203	21.6908	6.53662
297607812	Os07g0683600	LOC_Os07g48460	58.06	1	2	6	10	124	14.358	6.72705
297612839	Os12g0207500	LOC_Os03g55874/LOC_Os05g35320/LOC_Os06g39740/LOC_Os10g21266/LOC_Os12g10570	58.04	1	1	16	1249	336	36.1588	5.32568
115456089	Os03g0807800	LOC_Os03g59310	58.03	1	9	16	92	274	29.957	10.228
115441831	Os01g0916600	LOC_Os01g68790	58	1	6	6	22	150	15.5373	8.44092
115456265	Os03g0822200	LOC_Os03g60740	57.98	1	10	11	45	257	27.8934	6.81494
115444903	Os02g0202500	LOC_Os02g10810	57.97	1	1	6	23	69	7.54583	4.75439
297604682	Os05g0490800	LOC_Os05g41180	57.81	1	4	7	21	128	14.1399	4.79248
115484891	Os11g0242400	LOC_Os11g13850	57.76	1	13	13	62	277	29.4634	5.99854
115463027	Os05g0295800	LOC_Os05g22970	57.67	1	12	12	46	189	21.3155	6.22705
115469444	Os06g0669400	LOC_Os06g45820	57.64	1	25	27	181	609	65.4319	5.2876
115484899	Os11g0242800	---	57.6	1	12	13	445	283	30.2646	5.70654
115479211	Os09g0420800	LOC_Os09g25320	57.52	13	2	9	317	153	17.1192	6.06201
115466912	Os06g0196900	LOC_Os06g09679	57.47	1	1	11	84	221	22.9643	8.04541
115487910	Os12g0230100	LOC_Os12g12850	57.45	2	31	50	367	919	101.954	7.06396
115438975	Os01g0659200	LOC_Os01g46980	57.39	2	15	16	52	230	26.613	7.37158
115479839	Os09g0484200	LOC_Os09g31080	57.33	1	4	4	8	150	15.0962	3.75146
115451123	Os03g0180400	LOC_Os03g08280	57.32	1	15	15	48	246	27.5561	6.65381
115444937	Os02g0205300	LOC_Os02g11050	57.31	3	7	22	75	424	47.1928	8.85107
115460896	Os04g0643100	LOC_Os04g55040	57.25	1	15	16	36	269	29.1626	9.80322
115456796	Os04g0103200	LOC_Os04g01290	57.21	1	19	19	52	416	46.334	5.23682
115439261	Os01g0686800	LOC_Os01g49290	57.19	1	12	16	58	334	36.209	6.44287
297721797	Os03g0143300	LOC_Os03g04960	57.14	1	3	5	8	98	11.4517	6.29053
115473371	Os07g0617800	LOC_Os07g42600	57.14	1	12	13	39	329	36.4204	5.18604
115469430	Os06g0667500	LOC_Os06g45660	57.14	1	5	5	17	91	10.0105	9.15869
115469332	Os06g0659500	LOC_Os06g44910	57.14	1	4	4	6	77	8.72151	4.90674
115469104	Os06g0638200	LOC_Os06g43140	57.14	1	3	4	14	98	10.9783	5.07178
115440955	Os01g0840100	LOC_Os01g62290	57.1	1	4	37	262	648	70.907	5.21143
115458130	Os04g0397100	LOC_Os04g32560	57.07	1	6	22	144	403	45.0684	5.2749
115434488	Os01g0144100	LOC_Os01g05080	57.07	1	9	9	58	198	20.5615	7.28369
115480143	Os09g0515200	LOC_Os09g33986	57.03	1	10	10	39	256	28.4583	7.60596
115463485	Os05g0368300	LOC_Os05g30530	57.03	1	10	15	87	263	29.644	10.1401
115480019	Os09g0505600	LOC_Os09g32800	57.01	1	8	12	48	221	24.2662	6.88818
115448167	Os02g0704900	LOC_Os02g47600	57.01	3	4	10	66	214	24.1443	5.85889
297607896	Os08g0117200	LOC_Os08g02400	56.95	3	1	9	63	151	17.1045	10.5356
115474529	Os08g0117300	LOC_Os08g02410	56.95	3	1	9	65	151	17.1345	10.5356
115457386	Os04g0234600	LOC_Os04g16680	56.89	1	19	19	320	392	42.2181	5.84619
115458806	Os04g0462500	LOC_Os04g38870	56.87	1	4	16	100	262	29.845	4.80518
115446909	Os02g0580300	LOC_Os02g36974	56.87	1	3	16	97	262	29.6738	4.76709
115442397	Os01g0962400	LOC_Os01g73140	56.86	1	4	4	10	102	10.3556	9.61279
297608116	Os08g0199300	LOC_Os08g09940	56.85	1	23	23	88	394	44.3049	6.75635
115468926	Os06g0611900	LOC_Os01g51410/LOC_Os06g40940	56.84	1	4	34	496	892	96.8912	6.41748
297602674	Os04g0409200	LOC_Os04g33460	56.8	1	11	12	56	331	36.6637	4.81787
115465323	Os05g0553000	LOC_Os05g47980	56.7	1	3	23	319	552	58.8978	6.3667
115482676	Os10g0492300	LOC_Os10g35030	56.67	1	21	22	258	427	46.025	5.94775
115450427	Os03g0125000	LOC_Os03g03360	56.63	1	13	13	78	279	30.2002	10.3452
115453035	Os03g0351500	LOC_Os03g22810	56.58	1	2	6	41	152	15.2416	6.17627
115473713	Os07g0645400	LOC_Os07g45090	56.55	1	22	22	71	504	55.2251	8.04541
115476100	Os08g0366000	LOC_Os08g27840	56.54	2	31	53	216	964	109.986	5.79541
115478328	Os09g0279400	LOC_Os09g10750	56.49	1	12	12	62	239	25.8038	9.5249
115458896	Os04g0470100	LOC_Os04g39440	56.4	1	3	10	35	211	23.0695	7.44482
115443875	Os02g0121300	---	56.4	1	8	9	157	172	18.3491	8.33838
297607127	Os07g0435300	LOC_Os07g25430	56.31	1	5	5	450	103	11.3499	7.50342
115472625	Os07g0544800	LOC_Os07g36080	56.22	1	16	16	753	217	22.9675	9.80322
115471371	Os07g0246300	LOC_Os07g14280	56.19	1	14	17	53	315	33.7359	7.04932
115466690	Os06g0173100	LOC_Os06g07630	56.18	2	3	23	63	429	47.7496	5.07178
115463933	Os05g0418000	LOC_Os05g34540	56.18	2	19	21	87	445	49.6658	5.73193
115477521	Os08g0535600	---	56.16	1	4	4	10	73	8.27188	5.31299
297598102	Os01g0894300	LOC_Os01g66940	56.04	1	15	16	55	323	34.698	5.18604
115456623	Os03g0851100	LOC_Os03g63410	55.85	1	18	22	106	453	48.3932	6.48096
115454931	Os03g0712700	LOC_Os03g50480	55.84	1	29	29	204	582	62.9097	5.63037
115466256	Os06g0136600	LOC_Os06g04510	55.83	1	12	23	127	446	47.9084	5.56689
115452831	Os03g0332400	LOC_Os03g21460	55.81	1	11	11	57	258	28.5443	5.64307
115479813	Os09g0482100	LOC_Os09g30412/LOC_Os09g30418	55.79	3	3	47	279	699	80.1497	5.05908
115447137	Os02g0601300	LOC_Os02g38920	55.79	3	6	20	176	337	36.5449	7.88428
297611781	Os11g0455500	LOC_Os11g26850	55.73	1	23	25	165	515	56.5609	7.00537
115443657	Os02g0103800	LOC_Os02g01340	55.71	1	16	22	295	350	38.7234	7.84033
22417466	rpl2	---	55.68	2	13	13	53	273	29.9233	11.312
115487636	Os12g0178100	LOC_Os12g07820	55.66	2	9	14	58	309	33.4812	7.2251
115455463	Os03g0758400	LOC_Os03g55110	55.56	1	4	4	8	81	8.53431	4.52588
297727061	Os09g0482610	---	55.51	3	1	45	275	699	80.1337	5.05908
115444097	Os02g0137200	LOC_Os02g04460	55.47	1	12	12	70	274	29.4688	10.4917
115456633	Os03g0851700	LOC_Os03g63480	55.43	1	16	16	95	350	37.2111	4.70361
297606115	Os06g0598100	---	55.42	3	2	11	309	240	27.2447	6.56592
115440949	Os01g0839500	LOC_Os01g62230	55.4	1	2	10	194	139	15.3565	10.0229
115467518	Os06g0270900	LOC_Os06g15990	55.37	2	24	24	107	549	59.2696	6.80029
115471157	Os07g0212200	LOC_Os07g11110	55.36	2	16	16	415	392	40.9827	7.81104
115448453	Os02g0729400	LOC_Os02g49680	55.3	1	17	17	75	387	39.2841	9.5542
115463789	Os05g0402700	LOC_Os05g33380	55.26	1	7	20	135	333	36.2089	6.97607
115448191	Os02g0707100	LOC_Os02g47800	55.25	1	24	24	75	476	51.8308	8.71924
115489022	Os12g0555500	LOC_Os12g36880	55.06	1	8	8	22	158	16.6772	4.99561
115488340	Os12g0420200	LOC_Os12g23180	55.05	1	21	21	335	376	41.5065	8.52881
115487258	Os12g0138900	LOC_Os11g04670/LOC_Os12g04440	54.96	5	25	26	91	635	68.418	6.93213
115463815	Os05g0405000	LOC_Os05g33570	54.91	1	44	44	294	947	102.722	6.3667
115439059	Os01g0667600	LOC_Os01g47730	54.91	3	6	12	32	224	24.4294	5.37646
115476190	Os08g0379400	LOC_Os08g29170	54.87	1	20	20	222	390	39.558	7.86963
115435122	Os01g0200700	LOC_Os01g10400	54.84	3	3	3	12	62	6.41568	5.32568
115458588	Os04g0444600	LOC_Os04g36700	54.82	3	19	19	54	425	47.5671	6.17627
115477547	Os08g0538000	LOC_Os08g42560	54.73	1	34	36	103	698	77.0256	6.32861
297603846	Os05g0150800	LOC_Os05g05830	54.71	1	18	18	93	329	34.7397	9.33447
115463349	Os05g0350500	LOC_Os05g28280	54.71	1	21	21	99	393	43.1705	7.07861
115483212	Os10g0543800	LOC_Os10g39740	54.68	1	13	14	63	278	30.8255	6.94678
115464309	Os05g0460000	LOC_Os05g38530	54.64	1	5	38	272	646	70.7909	5.21143
115435200	Os01g0208700	LOC_Os01g11054	54.64	2	42	52	240	1014	114.125	6.0874
297605449	Os06g0232200	LOC_Os06g12600	54.61	1	20	21	72	401	42.59	6.65381
297599916	Os02g0744900	LOC_Os02g51080	54.6	1	22	22	116	489	53.3712	9.1001
115447171	Os02g0603800	LOC_Os02g39160	54.57	1	36	36	203	744	82.1092	5.93506
115434896	Os01g0180300	LOC_Os01g08510	54.57	1	43	43	163	766	84.0802	5.04639
115449297	Os02g0803700	LOC_Os02g56000	54.55	2	2	22	64	429	47.7676	5.07178
115456227	Os03g0819600	LOC_Os03g60509	54.51	1	9	9	43	233	23.8782	5.2749
115477837	Os08g0561700	LOC_Os08g44770	54.5	1	9	9	135	211	21.2879	6.25244
115459420	Os04g0515300	---	54.48	2	9	9	46	134	15.4056	10.1987
115450675	Os03g0143400	LOC_Os03g04970	54.42	2	8	31	158	577	61.0071	5.71924
115478212	Os09g0258600	LOC_Os09g08430	54.39	1	6	10	52	171	19.4833	10.3306
115464615	Os05g0491100	LOC_Os01g16240/LOC_Os05g41210/LOC_Os07g48780	54.36	2	1	12	70	149	16.8069	4.27197
115435978	Os01g0279300	LOC_Os01g17190	54.36	1	1	12	56	149	16.8209	4.27197
115476014	Os08g0345800	LOC_Os08g25734	54.28	1	14	21	141	479	52.9171	6.23975
115439241	Os01g0685800	LOC_Os01g49190	54.22	1	2	22	312	557	59.426	6.55127
115473643	Os07g0640100	LOC_Os07g44650	54.2	1	8	8	25	131	14.9546	9.01221
297597529	Os01g0722800	LOC_Os01g52460	54.17	1	2	8	28	168	18.0533	5.5542
115448841	Os02g0761900	LOC_Os02g52430	54.17	1	2	8	32	168	18.0383	5.88428
115480445	Os09g0541700	LOC_Os09g36990	54.12	1	7	7	25	194	20.6628	5.8208
297722723	Os03g0859600	LOC_Os03g64210	54.05	1	5	8	57	185	19.1953	9.979
115448833	Os02g0761400	LOC_Os02g52390	54	1	6	6	35	100	11.0515	4.50049
115466876	Os06g0192600	LOC_Os06g09290	53.99	2	22	22	75	426	47.6514	6.29053
115480367	Os09g0535000	LOC_Os09g36450	53.95	1	15	16	181	304	32.3727	7.35693
115467362	Os06g0246000	---	53.93	1	6	7	35	89	10.0572	9.61279
115446749	Os02g0562700	---	53.92	1	11	11	56	293	30.4767	6.59521
115435714	Os01g0254000	LOC_Os01g15010	53.89	3	6	10	32	193	21.9304	6.80029
297726307	Os08g0320000	LOC_Os08g23110	53.78	1	5	5	6	119	13.6741	8.41162
11466789	rps4	---	53.73	2	12	12	42	201	23.4081	10.9751
297599626	Os02g0625500	LOC_Os02g41590	53.72	1	13	15	85	376	40.8208	5.77002
115469362	Os06g0662000	LOC_Os06g45120	53.71	1	13	32	154	620	68.4257	5.33838
297721793	Os03g0141000	LOC_Os03g04750	53.66	1	2	9	48	164	18.6871	10.4038
115482412	Os10g0465800	---	53.66	1	2	9	48	164	18.7081	10.5796
115485315	Os11g0433900	---	53.62	2	4	4	18	69	8.03045	10.0669
297608990	Os08g0557100	LOC_Os08g44290	53.61	1	8	8	68	194	21.3758	5.04639
115434586	Os01g0153100	---	53.59	3	1	10	237	153	16.4621	10.0229
115434536	Os01g0149600	LOC_Os01g05610/LOC_Os01g05630	53.59	4	1	10	243	153	16.4921	10.0229
115487998	Os12g0244100	LOC_Os12g14070	53.58	1	30	40	259	698	74.0413	5.24951
115451989	Os03g0255500	LOC_Os03g15050	53.54	2	33	33	104	663	73.1579	7.23975
115450891	Os03g0161800	LOC_Os03g06620	53.54	3	11	11	34	198	23.4835	5.19873
115479353	Os09g0438700	LOC_Os09g26730	53.47	1	10	12	71	245	25.4785	6.26514
115455427	Os03g0756000	LOC_Os03g54890	53.4	3	8	13	49	206	23.601	10.3013
115447273	Os02g0612900	LOC_Os02g39930	53.33	1	11	11	55	195	22.2072	5.38916
115482534	Os10g0478200	LOC_Os10g33800	53.31	1	16	17	333	332	35.5461	6.0874
115436432	Os01g0348700	LOC_Os01g24690	53.29	2	10	10	72	152	17.0397	10.3013
115473833	Os07g0657900	LOC_Os07g46410	53.28	1	23	23	102	488	53.2301	5.84619
115450991	Os03g0169100	LOC_Os03g07300	53.28	1	8	8	102	274	29.0164	8.42627
115436010	Os01g0283100	LOC_Os01g18070	53.23	1	12	12	82	263	28.4513	6.85889
115459670	Os04g0539000	LOC_Os04g45600	53.18	1	9	9	47	220	25.6489	5.74463
115465369	Os05g0556900	---	53.15	1	4	6	51	111	12.6527	10.6528
115474029	Os07g0674200	LOC_Os07g47710	53.08	1	5	7	42	130	14.4076	9.5542
297726683	Os08g0565800	LOC_Os08g45140	53.05	1	6	6	23	164	17.8213	9.83252
115482800	Os10g0502600	LOC_Os10g35870	53.02	2	11	11	44	232	24.6193	4.58936
115472167	Os07g0492000	LOC_Os07g30970	53.02	1	7	8	32	149	16.8506	6.80029
115437604	Os01g0558600	---	52.97	3	6	12	46	202	22.4622	5.2749
115455701	Os03g0780600	LOC_Os03g56810	52.93	1	4	18	86	444	49.7897	4.86865
115451609	Os03g0219900	LOC_Os03g12020	52.85	1	16	16	90	263	27.8599	10.6089
115450521	Os03g0131200	LOC_Os03g03910	52.85	1	19	24	347	492	56.7283	7.41553
115473843	Os07g0658400	LOC_Os07g46460	52.83	1	42	42	448	1166	125.592	6.45557
115476102	Os08g0366100	LOC_Os08g27850	52.82	1	10	10	34	142	15.6193	9.94971
115477126	Os08g0500700	LOC_Os08g39140	52.74	1	6	42	245	694	79.5667	5.13525
297605549	Os06g0264700	LOC_Os06g15390	52.71	1	6	6	10	129	13.5492	11.5757
115462209	Os05g0157200	LOC_Os05g06500	52.69	1	8	8	30	167	17.9924	5.37646
115465309	Os05g0552300	LOC_Os05g47890	52.68	1	10	14	44	336	36.4291	6.53662
115441385	Os01g0876900	LOC_Os01g65560	52.66	1	10	10	25	188	20.3885	7.04932
115468356	Os06g0530200	---	52.63	1	3	3	8	95	10.2525	9.81787
115484175	Os11g0148500	LOC_Os11g05110	52.56	1	3	24	140	527	57.284	6.75635
115453785	Os03g0563300	LOC_Os03g36540	52.53	1	20	20	128	415	44.8375	5.71924
115483672	Os10g0579300	LOC_Os10g42840	52.5	1	9	9	34	160	18.5062	7.06396
115450389	Os03g0121700	LOC_Os03g02960	52.49	1	8	8	52	221	23.7095	4.43701
297722605	Os03g0796501	LOC_Os03g58204	52.48	1	10	20	112	404	44.461	10.5503
115472727	Os07g0556200	LOC_Os07g37030	52.44	1	10	10	186	225	23.8692	8.25049
115449517	Os02g0813500	LOC_Os02g56850	52.42	1	19	19	70	496	53.4734	6.66846
115480399	Os09g0537700	LOC_Os09g36680	52.38	1	13	13	92	252	28.3798	5.43994
115456231	Os03g0819900	LOC_Os03g60530	52.34	3	2	13	40	214	23.7642	7.81104
115454943	Os03g0713400	LOC_Os03g50540	52.34	1	29	29	113	747	81.065	6.20166
115443791	Os02g0115900	LOC_Os02g02410	52.33	3	33	35	163	665	73.3449	5.18604
115483468	Os10g0563700	LOC_Os10g41410	52.32	1	7	8	22	151	16.7688	7.50342
297609078	Os09g0133600	LOC_Os09g04790	52.28	1	9	9	45	241	26.4728	5.14795
115477687	Os08g0549100	LOC_Os08g43560	52.23	1	14	18	180	291	31.7184	7.97217
115467258	Os06g0232600	LOC_Os06g12630	52.21	1	11	13	97	272	29.6636	7.95752
115465371	Os05g0557000	LOC_Os05g48320	52.17	1	6	6	66	92	10.2364	10.2866
115449773	Os02g0821200	LOC_Os02g57540	52.17	1	5	6	48	92	10.2387	10.7114
115465581	Os05g0574500	LOC_Os05g49890	52.04	2	4	11	57	221	25.0227	7.12256
115479119	Os09g0411700	LOC_Os09g24540	52.03	1	8	8	23	148	15.3586	9.33447
297720649	Os01g0887000	---	52	1	2	2	7	50	5.60983	4.42432
115455493	Os03g0760700	LOC_Os03g55280	52	1	14	14	51	375	40.1526	7.1958
115480581	Os09g0553900	LOC_Os09g38090	51.98	1	42	42	144	883	94.1578	5.33838
115463645	Os05g0387200	LOC_Os05g32140	51.98	1	20	20	94	479	52.8375	8.23584
115476792	Os08g0464000	LOC_Os08g36150	51.97	1	17	18	38	356	39.203	5.50342
115476610	Os08g0440100	LOC_Os08g34150	51.96	1	10	10	54	179	20.5733	6.55127
297604862	Os05g0548900	LOC_Os05g47540	51.92	1	9	11	44	208	23.6208	6.07471
115439213	Os01g0682500	LOC_Os01g48990	51.91	1	18	18	79	418	46.1346	6.90283
115438576	Os01g0615300	LOC_Os01g42880	51.89	1	17	18	55	424	45.6763	5.24951
115458648	Os04g0448600	LOC_Os04g37580	51.87	1	8	8	26	187	21.1395	6.39209
115443787	Os02g0115700	LOC_Os02g02400	51.83	1	15	19	124	492	56.6621	7.00537
115475672	Os08g0276100	LOC_Os08g17390	51.81	1	23	23	106	469	51.6292	6.91748
115440617	Os01g0811100	LOC_Os01g59600	51.81	1	11	14	55	249	27.2208	6.0874
115476296	Os08g0398400	LOC_Os08g30790	51.76	1	12	16	62	284	31.3601	5.35107
115487000	Os12g0115100	LOC_Os12g02320	51.72	2	1	5	77	116	11.3378	9.33447
115483843	Os11g0115400	LOC_Os11g02389	51.72	2	1	5	80	116	11.3098	9.33447
297602639	Os04g0397500	LOC_Os04g32590	51.67	1	12	17	43	329	34.8614	5.93506
115483628	Os10g0576000	LOC_Os10g42540	51.67	1	3	3	19	60	7.08666	8.52881
115458874	Os04g0467700	LOC_Os04g39270	51.63	1	11	12	34	246	26.5861	5.35107
115447223	Os02g0608900	LOC_Os02g39600	51.62	1	17	17	64	370	41.0501	9.21729
297613543	Os12g0620400	LOC_Os12g42550	51.59	1	5	5	37	126	13.6529	9.30518
115438482	Os01g0611100	---	51.58	1	2	9	42	221	24.9866	6.85889
115479643	Os09g0465600	LOC_Os09g29070	51.52	1	15	30	99	625	68.379	6.02393
115441899	Os01g0921600	LOC_Os01g69250	51.49	1	10	10	61	202	22.5889	5.64307
115456443	Os03g0836000	---	51.46	1	3	15	133	377	41.679	5.49072
115468606	Os06g0568200	LOC_Os06g37180	51.43	2	22	22	95	488	54.0246	5.18604
115455133	Os03g0731900	LOC_Os03g52170	51.42	1	22	22	114	459	51.0318	5.66846
115440691	Os01g0817700	---	51.34	1	14	27	152	559	60.7519	5.68115
297608780	Os08g0490900	LOC_Os08g38300	51.33	1	1	10	206	150	16.324	10.0815
115436290	Os01g0326000	LOC_Os01g22230	51.26	17	12	16	67	357	37.7067	6.66846
297607020	Os07g0275100	---	51.25	1	1	3	14	80	9.65506	9.31982
115465117	Os05g0535700	LOC_Os05g45910	51.25	1	4	4	12	80	8.61738	7.41553
115444021	Os02g0131300	LOC_Os02g03860	51.25	1	16	16	55	240	27.3226	6.93213
115442365	Os01g0959900	LOC_Os01g72950/LOC_Os01g72960	51.22	1	8	8	29	164	17.8635	9.5542
115463081	Os05g0303000	LOC_Os05g23740	51.2	1	15	25	218	459	48.619	4.729
115456165	Os03g0815200	LOC_Os03g60090	51.18	2	27	27	91	594	66.3883	5.56689
297721265	Os02g0526500	LOC_Os02g32530	51.14	1	4	4	13	88	10.1986	9.74463
115472897	Os07g0570700	LOC_Os07g38300	51.13	1	14	14	70	266	29.6338	9.33447
115471353	Os07g0243100	---	51.11	1	4	5	7	90	10.4371	7.76709
115462193	Os05g0156300	LOC_Os05g06430	51.09	1	12	20	77	366	39.8875	6.99072
115443891	Os02g0122300	---	51.08	1	11	11	23	231	25.7738	4.89404
115487104	Os12g0124200	LOC_Os12g03090	51.01	1	9	9	30	149	16.8082	10.5649
115483602	Os10g0573700	LOC_Os10g42299	50.95	1	14	14	93	316	31.5345	9.30518
115466046	Os06g0116600	LOC_Os06g02600	50.91	1	4	6	19	165	18.8694	7.06396
115443955	Os02g0127000	LOC_Os02g03470	50.88	1	9	9	19	226	25.432	6.771
115462755	Os05g0230900	LOC_Os05g14194	50.86	1	12	15	129	291	32.4724	5.21143
297600721	Os03g0278300	LOC_Os03g17010	50.84	3	13	13	47	238	24.7055	9.83252
115450565	Os03g0134900	LOC_Os03g04220	50.78	1	15	16	93	319	35.6826	7.57666
115450022	Os02g0830100	LOC_Os02g58340	50.78	1	35	36	145	770	86.1641	6.07471
115462317	Os05g0169000	LOC_Os05g07690	50.76	2	6	8	16	132	14.8054	6.01123
297610955	Os10g0566700	LOC_Os10g41710	50.71	1	7	7	20	140	14.7548	7.28369
115447017	Os02g0591700	LOC_Os02g37862	50.68	1	9	12	70	219	24.2432	10.1108
115489500	Os12g0608600	LOC_Os12g41500	50.65	1	16	16	41	387	41.2671	7.31299
297720581	Os01g0847800	LOC_Os01g62880	50.62	1	3	5	15	81	8.67952	8.48486
115439139	Os01g0676200	LOC_Os01g48500	50.62	1	11	11	30	241	25.9576	8.77783
115482580	Os10g0483000	LOC_Os10g34180	50.61	1	3	7	22	164	17.6242	7.25439
115453345	Os03g0390000	LOC_Os03g27260	50.61	1	4	16	58	245	28.0413	10.6382
115454137	Os03g0618300	LOC_Os03g42130	50.57	1	12	16	33	352	39.2687	5.33838
115442415	Os01g0963600	LOC_Os01g73250	50.55	1	7	7	18	182	20.4273	7.10791
297724229	Os05g0500450	---	50.51	1	4	4	8	99	10.0609	4.84326
115461330	Os04g0677500	LOC_Os04g58110	50.29	2	22	24	107	511	55.1909	7.91357
297600141	Os02g0822600	LOC_Os02g57670	50.27	1	10	10	69	187	20.7715	9.92041
115437234	Os01g0531500	LOC_Os01g34700	50.18	1	10	10	33	281	30.3913	6.80029
11466861	rps7	---	50	2	9	10	34	156	17.6179	11.8101
115485587	Os11g0497000	LOC_Os11g30410	50	1	14	14	30	328	35.9081	5.61768
115463351	Os05g0350600	LOC_Os05g28290	50	1	8	12	52	220	24.0679	4.77979
115461585	Os05g0103200	LOC_Os05g01270	50	1	12	13	143	250	26.5737	9.29053
115451277	Os03g0192400	LOC_Os03g09210	50	1	6	6	21	142	15.9482	9.59814
115446663	Os02g0553200	LOC_Os02g34810	50	1	16	22	173	478	51.1558	5.52881
115488878	Os12g0533700	LOC_Os12g34860	49.88	1	22	22	91	429	48.9814	5.74463
297606119	Os06g0598500	LOC_Os01g58020/LOC_Os05g35330/LOC_Os10g21268	49.82	1	2	18	9300	273	29.517	6.96143
297611974	Os11g0546900	LOC_Os11g34450	49.81	1	7	13	66	265	29.2436	4.90674
115483086	Os10g0530400	LOC_Os10g38700	49.79	3	8	11	81	241	25.6554	5.51611
115449669	Os02g0817700	LOC_Os02g57260	49.78	1	18	18	65	448	46.8	8.14795
115479061	Os09g0402100	LOC_Os09g23730	49.77	1	10	10	46	213	21.7394	9.94971
297721725	Os03g0100200	---	49.75	1	8	8	38	203	21.9627	7.85498
115444489	Os02g0169900	LOC_Os02g07350	49.73	1	13	13	53	364	38.8858	6.94678
115473429	Os07g0622100	---	49.6	1	3	15	62	250	28.4546	10.6528
115482792	Os10g0502000	LOC_Os10g35810	49.58	1	10	10	81	236	24.5183	7.54736
115465884	Os06g0103400	LOC_Os06g01370	49.55	1	4	4	10	111	12.3264	5.50342
115469822	Os06g0704600	LOC_Os06g49110	49.53	1	17	17	100	426	46.2562	6.15088
115451483	Os03g0210600	LOC_Os03g11220	49.53	1	10	10	19	212	22.5573	5.61768
297605951	Os06g0531200	LOC_Os06g34040	49.49	6	15	16	68	394	41.6666	5.65576
11466865	rpl23	---	49.46	1	4	4	17	93	10.7567	10.1401
115454033	Os03g0599800	LOC_Os03g40270	49.45	1	10	17	69	364	41.3216	6.18896
115485529	Os11g0484000	LOC_Os11g29370	49.42	1	20	20	72	518	56.9235	5.92236
115470052	Os06g0725900	LOC_Os06g51029	49.42	1	26	27	239	686	72.658	5.69385
11466782	atpH	---	49.38	1	3	3	106	81	7.9694	4.90674
115434798	Os01g0173100	LOC_Os01g07810	49.34	1	4	7	25	152	16.2504	5.09717
115450567	Os03g0135100	LOC_Os03g04240	49.33	1	11	11	50	225	25.6411	7.18115
115468758	Os06g0594100	LOC_Os06g39344	49.31	1	21	21	95	434	46.8539	6.93213
115458488	Os04g0434800	LOC_Os04g35520	49.3	1	11	16	66	359	38.3015	8.646
115464251	Os05g0455700	LOC_Os05g38170	49.17	1	12	12	33	301	31.6088	9.53955
115487322	Os12g0145700	LOC_Os12g05110	49.15	1	2	23	124	527	57.4061	6.75635
115469982	Os06g0716700	LOC_Os06g50300	49.14	1	45	45	148	810	92.7612	4.98291
115460220	Os04g0591000	LOC_Os04g50110	49.14	1	12	12	55	291	31.6533	6.46826
194033257	atp1	---	49.12	1	21	26	347	509	55.3389	6.1001
297606737	Os07g0150200	---	49.12	1	1	8	49	171	18.3675	6.66846
115477457	Os08g0530200	---	49.12	2	6	10	46	171	19.4713	10.3599
115466486	Os06g0153800	LOC_Os06g06030	49.1	1	11	11	49	277	29.7656	5.85889
115446173	Os02g0489400	---	49.09	1	3	10	58	220	24.8142	10.4038
115462281	Os05g0164100	LOC_Os05g07130	49.03	1	26	32	110	773	84.8942	6.48096
115471041	Os07g0196200	LOC_Os07g09800	48.98	1	10	10	43	245	25.9452	5.37646
115454433	Os03g0659200	LOC_Os03g45710	48.98	1	7	7	26	147	15.4798	5.021
115472753	Os07g0558400	LOC_Os07g37240	48.97	1	16	16	477	290	31.33	5.50342
115461520	Os04g0691600	LOC_Os04g59494	48.97	1	7	7	51	145	15.9656	10.8286
115477014	Os08g0487800	LOC_Os08g38086	48.92	1	17	35	146	785	88.2927	5.09717
115456045	Os03g0804800	LOC_Os03g59020	48.9	1	24	24	70	546	58.7463	5.42725
297600802	Os03g0305000	LOC_Os03g19240	48.81	1	7	9	33	252	27.3579	7.10791
115465974	Os06g0111500	LOC_Os06g02144	48.75	1	18	21	90	480	52.6878	6.17627
297606796	Os07g0173700	LOC_Os07g07709/LOC_Os07g07719	48.68	1	11	11	55	152	17.6515	10.7407
115484761	Os11g0220800	LOC_Os11g11390	48.66	1	5	10	48	224	25.3303	10.2427
115469872	Os06g0708500	LOC_Os06g49480	48.64	1	8	11	58	220	23.4772	9.67139
115489474	Os12g0605400	LOC_Os12g41220	48.63	3	7	8	15	146	16.6543	6.93213
115458444	Os04g0431100	LOC_Os04g35180	48.62	1	11	11	31	290	31.4915	7.60596
115448227	Os02g0709900	LOC_Os02g48010	48.57	2	71	72	201	1155	132.251	5.19873
115487950	Os12g0236400	LOC_Os12g13380	48.55	1	7	12	36	241	26.3889	8.27979
115461052	Os04g0658000	LOC_Os04g56290	48.55	2	13	13	33	344	37.926	5.23682
115470251	Os07g0109500	LOC_Os07g01870	48.54	1	7	12	32	206	23.6569	10.4624
115438681	Os01g0624500	LOC_Os01g43540	48.5	1	19	19	55	367	40.9125	5.05908
297613111	Os12g0443700	LOC_Os12g25710	48.43	4	24	25	73	510	57.9133	7.04932
115449199	Os02g0794700	LOC_Os02g55140	48.42	2	11	13	100	316	33.1647	5.70654
115466906	Os06g0196300	LOC_Os06g09610	48.39	1	10	10	141	217	23.7224	9.90576
115463761	Os05g0400400	LOC_Os05g33210	48.39	1	3	3	15	62	7.0716	8.57275
115476576	Os08g0435900	LOC_Os08g33820	48.36	1	8	8	89	244	26.9388	7.03467
115451815	Os03g0240500	LOC_Os03g13730	48.32	1	15	15	42	327	36.2581	9.14404
115444877	Os02g0199900	LOC_Os02g10640	48.25	1	5	17	42	400	44.5583	7.45947
297601057	Os03g0399800	---	48.24	1	8	8	24	199	20.8247	5.38916
115438875	Os01g0649100	LOC_Os01g46070	48.24	1	5	14	82	340	35.4386	8.55811
115456914	Os04g0118400	LOC_Os04g02820	48.16	1	3	39	298	843	93.9126	6.16357
115446385	Os02g0519900	LOC_Os02g32030	48.16	1	4	39	300	843	93.9605	6.16357
115445821	Os02g0321900	LOC_Os02g21660	48.15	2	9	10	35	216	24.6242	9.78857
115473331	Os07g0614500	LOC_Os07g42300	48.03	1	6	9	62	229	24.8473	4.52588
297605899	Os06g0508700	LOC_Os06g31210	48.01	1	26	28	86	727	81.4159	6.56592
115480761	Os09g0568900	LOC_Os09g39550	47.97	1	6	7	40	123	12.8947	9.5542
115464019	Os05g0427800	LOC_Os01g58020/LOC_Os05g35330/LOC_Os10g21268/LOC_Os12g10580	47.97	1	1	6	2733	148	16.4302	4.97021
115479209	Os09g0420700	LOC_Os09g25314	47.95	1	2	3	6	73	7.90172	6.50732
115462319	Os05g0169100	---	47.95	1	5	10	59	219	24.656	10.3599
115453473	Os03g0408300	LOC_Os03g29460	47.95	1	3	7	38	146	16.0437	11.019
115450913	Os03g0163300	LOC_Os03g06740	47.93	1	18	21	103	555	60.2152	7.60596
115475980	Os08g0338700	LOC_Os08g25090	47.91	1	7	11	27	311	33.6982	5.35107
115457788	Os04g0338000	LOC_Os04g26910	47.86	3	12	16	45	351	38.2095	6.45557
115440977	Os01g0841600	LOC_Os01g62420	47.84	1	7	9	31	255	27.2562	5.73193
11466827	rpl16	---	47.79	1	5	5	26	136	15.6044	11.5317
115453111	Os03g0360700	LOC_Os03g24600	47.79	1	5	5	16	136	14.663	7.23975
115434888	Os01g0179700	LOC_Os01g08450	47.78	4	5	11	47	203	22.5062	5.70654
297610791	Os10g0518200	LOC_Os10g37420	47.76	1	4	5	18	134	14.7565	4.91943
115484337	Os11g0163100	LOC_Os11g06390	47.75	2	2	15	172	377	41.5959	5.49072
115482882	Os10g0510000	LOC_Os10g36650	47.75	1	1	15	143	377	41.653	5.49072
115454971	Os03g0718100	LOC_Os03g50885	47.75	2	4	15	151	377	41.7859	5.49072
297608865	Os08g0524600	LOC_Os08g41300	47.68	3	2	8	43	151	17.7957	10.5063
115441587	Os01g0895100	LOC_Os01g67000	47.63	1	14	14	87	317	35.0672	9.27588
115465785	Os05g0591900	LOC_Os05g51420	47.57	1	8	15	48	288	31.6013	6.41748
115458542	Os04g0439900	LOC_Os04g35900	47.55	1	16	16	79	429	46.2955	5.37646
115481692	Os10g0363300	LOC_Os10g21910	47.54	1	10	12	20	244	28.1746	8.47021
115459260	Os04g0501600	LOC_Os04g42320	47.52	1	44	44	108	846	92.4514	6.43018
115489790	Os12g0638700	LOC_Os12g44150	47.49	2	14	41	183	956	105.355	6.56592
115480799	Os09g0571400	LOC_Os09g39780	47.49	1	6	8	28	179	19.1864	7.78174
115441253	Os01g0866400	LOC_Os01g64660	47.49	1	14	16	119	339	37.0249	6.18896
115469752	Os06g0699900	LOC_Os06g48640	47.48	1	1	10	30	238	26.0549	8.55811
115483847	Os11g0116000	LOC_Os11g02400	47.46	2	4	5	32	118	11.4329	9.0708
115436382	Os01g0339900	LOC_Os01g23740	47.44	1	13	21	69	371	40.7149	6.87354
115472203	Os07g0496200	LOC_Os07g31380	47.43	1	24	24	81	622	68.8993	6.44287
115450217	Os03g0109600	LOC_Os03g01910	47.43	1	3	7	22	175	19.1959	5.36377
115444237	Os02g0149800	LOC_Os02g05630	47.41	1	7	14	33	348	37.5448	5.16064
297728323	Os11g0456300	LOC_Os11g26910	47.4	4	7	7	27	173	19.0564	4.61475
297727127	Os09g0501100	LOC_Os09g32500	47.37	2	1	7	39	133	15.7206	10.5796
115478330	Os09g0279500	LOC_Os09g10760	47.35	1	10	10	52	245	26.6646	8.41162
115444405	Os02g0162500	LOC_Os02g06700	47.33	2	8	8	39	150	16.3527	10.4478
115448817	Os02g0760300	LOC_Os02g52290	47.32	1	4	4	34	112	12.0781	7.95752
115464897	Os05g0516800	LOC_Os05g44070	47.27	3	2	10	23	220	24.1311	5.36377
115487556	Os12g0169700	LOC_Os12g07220	47.25	2	11	11	40	273	29.6134	6.91748
115481322	Os10g0182000	LOC_Os10g10244	47.25	1	45	45	185	999	109.338	6.56592
297606267	Os06g0646500	LOC_Os06g43850	47.23	1	14	14	56	271	29.6209	9.56885
115464649	Os05g0494200	LOC_Os05g41460	47.22	1	5	5	12	108	12.0691	5.85889
115444553	Os02g0175600	LOC_Os02g07890	47.22	1	2	6	27	144	15.7856	11.1362
115465079	Os05g0533100	LOC_Os05g45660	47.2	2	11	13	149	286	32.3937	9.67139
297599584	Os02g0612000	LOC_Os02g39870	47.19	1	2	2	9	89	10.07	4.48779
115445203	Os02g0234500	LOC_Os02g13970	47.19	2	22	23	75	587	63.8089	8.52881
115434790	Os01g0172400	LOC_Os01g07760	47.17	3	29	34	117	812	92.161	5.96045
115441943	Os01g0924900	LOC_Os01g70020	47.15	1	22	22	66	509	56.2325	6.46826
115455455	Os03g0757900	LOC_Os03g55070	47.08	3	3	18	41	480	52.8651	6.12549
115466188	Os06g0130900	LOC_Os06g04030	47.06	4	3	7	40	136	15.3966	11.1509
115460338	Os04g0602100	LOC_Os04g51300	47.03	1	17	17	77	353	38.1578	8.45557
115476914	Os08g0478800	LOC_Os08g37380	46.99	1	13	28	91	615	67.2291	5.94775
115435820	Os01g0265100	LOC_Os01g16030	46.96	6	8	8	51	181	20.6837	6.94678
115441861	Os01g0919400	LOC_Os01g69030	46.94	1	4	4	17	98	11.7582	8.11865
115464307	Os05g0459900	LOC_Os05g38520	46.9	1	2	7	33	113	12.7273	11.4292
115452485	Os03g0298400	LOC_Os03g18690	46.89	1	4	20	61	450	49.6831	6.21436
297720473	Os01g0791150	LOC_Os01g58000/LOC_Os03g55874/LOC_Os06g02980/LOC_Os06g39756/LOC_Os10g21264	46.86	1	1	11	682	318	34.8301	5.07178
297608344	Os08g0288200	LOC_Os08g19140	46.86	1	22	23	99	493	55.6241	5.42725
115452651	Os03g0313000	LOC_Os03g19890	46.82	1	8	8	23	173	19.5011	4.90674
115465357	Os05g0556100	LOC_Os05g48240	46.8	1	28	29	73	609	68.6409	7.78174
11466766	rps16	---	46.77	1	2	3	7	62	7.38405	10.1694
115472485	Os07g0529600	LOC_Os07g34570	46.76	1	12	12	158	355	37.2008	5.69385
115461046	Os04g0657500	LOC_Os04g56240	46.75	1	19	19	63	462	51.7707	9.29053
115436118	Os01g0300200	LOC_Os01g19450	46.71	1	23	23	83	608	66.028	7.6792
115440559	Os01g0805300	LOC_Os01g59090	46.69	1	11	11	55	272	28.787	8.25049
115474241	Os07g0691800	LOC_Os07g49150	46.65	1	3	19	61	448	49.556	6.21436
115469470	Os06g0671900	LOC_Os06g46000	46.65	1	3	16	82	433	48.433	4.76709
297600362	Os03g0158200	LOC_Os03g06220	46.59	1	4	4	10	88	10.3012	5.93506
115455471	Os03g0758800	LOC_Os03g55150	46.58	1	2	7	43	161	17.5337	6.13818
115469028	Os06g0625500	LOC_Os06g42000	46.55	1	6	7	59	232	23.6736	8.79248
115434226	Os01g0120800	---	46.55	1	43	43	115	986	113.825	9.33447
115484365	Os11g0168200	LOC_Os11g06750	46.53	2	20	20	135	389	44.4627	10.0815
115459032	Os04g0482000	LOC_Os04g40600	46.52	1	8	9	33	187	20.7941	6.29053
115435020	Os01g0191100	LOC_Os01g09510	46.49	1	3	3	10	114	11.5996	4.32275
11466828	rps3	---	46.44	1	16	16	61	239	27.5009	9.74463
115449101	Os02g0785800	LOC_Os02g54470	46.43	1	3	5	36	112	12.7067	10.5503
115461679	Os05g0110300	LOC_Os05g01970	46.42	1	12	13	61	293	31.2555	9.05615
297598267	Os01g0935600	LOC_Os01g70950	46.41	1	8	8	15	209	22.6333	5.23682
115479691	Os09g0471100	LOC_Os09g29490	46.39	1	14	14	45	360	38.5292	5.21143
115487694	Os12g0189400	---	46.31	2	7	7	56	149	15.9052	9.0415
115441963	Os01g0926300	LOC_Os01g70170	46.3	1	19	19	67	432	46.4023	6.44287
115461158	Os04g0665700	LOC_Os04g57010	46.28	1	10	11	26	309	31.7675	9.36377
115452629	Os03g0310400	LOC_Os03g19680	46.27	1	11	11	26	268	28.8711	8.54346
297727733	Os10g0503800	LOC_Os10g36000	46.15	1	6	6	23	65	7.34994	9.5249
115466024	Os06g0115300	LOC_Os06g02490	46.15	1	4	5	24	91	10.2422	5.04639
115441753	Os01g0910900	LOC_Os01g68300	46.15	1	5	5	12	91	10.533	6.40479
115451067	Os03g0175600	LOC_Os03g07910	46.13	1	13	13	50	310	33.6219	5.69385
115448605	Os02g0741500	LOC_Os02g50799	46.11	1	25	25	42	501	56.5998	5.05908
115471985	Os07g0467500	LOC_Os07g28430	46.1	1	9	9	20	269	27.9836	4.83057
297602104	Os04g0137500	LOC_Os04g05080	46.08	2	4	4	12	102	11.5911	7.40088
115452847	Os03g0333400	LOC_Os03g21560	46.06	1	6	6	61	165	17.6423	9.90576
115459134	Os04g0490800	LOC_Os04g41340	46.03	2	17	18	208	365	39.469	7.15186
297725771	Os07g0549700	LOC_Os07g36470	46.02	1	6	6	22	113	13.0295	4.84326
297600051	Os02g0800000	LOC_Os02g55630	46.02	1	7	7	23	176	20.4279	6.48096
115479725	Os09g0474300	LOC_Os09g29840	46.02	1	12	29	128	654	74.7586	8.86572
115453465	Os03g0406200	LOC_Os03g29260	46.02	1	5	8	38	226	24.6392	4.52588
115452457	Os03g0296400	LOC_Os03g18510	46.02	2	16	16	56	339	38.2106	5.38916
115456239	Os03g0820500	---	46	1	4	4	8	150	16.1659	5.08447
115452937	Os03g0341100	LOC_Os03g22180	45.99	1	5	8	18	187	21.0607	11.4292
297596480	Os01g0260700	LOC_Os01g15600	45.97	1	14	14	48	298	32.313	5.66846
115479433	Os09g0446800	LOC_Os09g27420	45.97	1	28	28	117	707	75.471	8.08936
115448975	Os02g0773300	LOC_Os02g53330	45.97	1	15	16	40	385	41.3534	7.29834
115465163	Os05g0540300	LOC_Os05g46290	45.96	1	23	26	65	581	61.5503	7.02002
115455699	Os03g0780500	LOC_Os03g56800	45.91	1	7	7	30	220	22.9237	8.67529
115461639	Os05g0106600	LOC_Os05g01600	45.89	2	1	14	143	377	41.6689	5.40186
297720927	Os02g0173900	LOC_Os02g07760	45.87	1	8	9	20	218	23.9349	5.2876
115435220	Os01g0210500	LOC_Os01g11230	45.87	1	7	7	20	218	23.5815	4.88135
115461935	Os05g0134400	LOC_Os05g04380	45.85	1	7	7	23	205	22.9259	8.70459
115435974	Os01g0279100	LOC_Os01g17170	45.83	1	20	20	85	408	47.2714	8.76318
115456627	Os03g0851300	LOC_Os03g63430	45.82	1	21	21	52	443	50.6167	7.63525
115452127	Os03g0267300	LOC_Os03g16050	45.81	1	17	17	207	406	43.5768	5.12256
11466853	ndhH	---	45.8	2	16	16	60	393	45.6555	5.8208
115452579	Os03g0306800	LOC_Os03g19380	45.8	1	6	6	17	131	13.8888	4.7417
115470953	Os07g0187300	LOC_Os07g08960	45.78	1	13	13	38	308	33.2305	9.26123
115446557	Os02g0539600	LOC_Os02g33610	45.77	2	15	15	25	319	35.5418	8.99756
115476062	Os08g0359000	LOC_Os08g27010	45.76	1	12	12	55	271	28.721	8.96826
115462609	Os05g0208000	LOC_Os05g11780	45.75	1	6	13	104	306	32.781	9.5542
115485513	Os11g0482000	LOC_Os11g29190	45.73	2	10	10	63	199	22.1928	9.70068
115465125	Os05g0536200	LOC_Os05g45950	45.71	1	10	11	71	280	29.5843	8.646
115434904	Os01g0180800	LOC_Os01g08560	45.68	1	27	36	142	845	93.0489	5.2749
115454007	Os03g0596900	LOC_Os03g40010	45.66	1	36	36	117	703	77.8415	5.13525
115438554	Os01g0614700	---	45.65	1	8	8	20	184	21.0876	5.47803
297608399	Os08g0320400	LOC_Os08g23150	45.63	1	3	4	14	103	11.1668	4.88135
115470118	Os06g0730800	LOC_Os06g51420	45.6	1	7	7	17	182	20.146	5.0083
11466825	rps8	---	45.59	1	6	6	22	136	15.6006	10.9751
115468452	Os06g0548000	LOC_Os06g35540	45.57	2	10	18	69	463	51.2878	8.26514
115446249	Os02g0503400	LOC_Os02g30050	45.53	3	8	8	34	123	14.2354	11.2534
297727253	Os09g0567350	LOC_Os09g39390	45.45	1	17	17	78	385	42.1905	7.76709
297725585	Os07g0409200	LOC_Os07g22650	45.45	1	3	3	10	77	8.17029	9.90576
297721329	Os02g0564200	---	45.45	1	3	3	4	66	7.46179	10.3745
115474515	Os08g0116500	---	45.45	1	2	2	11	110	11.0756	4.51318
115440961	Os01g0840700	LOC_Os01g62350	45.45	1	2	7	27	110	12.4202	11.4292
115440075	Os01g0760600	LOC_Os01g55540	45.43	1	19	19	68	460	49.9025	8.48486
115469764	Os06g0701100	LOC_Os06g48750	45.41	2	3	21	154	414	47.058	5.56689
115480834	Os10g0100700	LOC_Os10g01080	45.37	1	3	15	123	313	33.1281	6.65381
115435008	Os01g0190000	LOC_Os01g09430	45.37	1	14	14	31	335	36.5167	5.78271
297610525	Os10g0430200	LOC_Os10g29470	45.36	2	11	11	70	366	38.4982	6.34131
115458432	Os04g0430100	LOC_Os04g35090	45.36	1	3	8	46	183	20.2502	9.75928
115436038	Os01g0286600	LOC_Os01g18320	45.34	2	18	18	48	536	56.6917	9.0415
115466388	Os06g0146300	LOC_Os06g05390	45.29	1	8	8	22	223	25.1559	5.22412
115468200	Os06g0498400	---	45.26	1	58	58	181	1414	157.898	5.50342
115453971	Os03g0592500	LOC_Os03g39610	45.25	1	5	8	754	263	28.4774	5.90967
115468134	Os06g0486800	LOC_Os06g29180	45.21	1	16	21	92	376	41.3152	7.1665
115437448	Os01g0550000	LOC_Os01g36920	45.14	2	17	17	78	432	48.5356	5.71924
297610744	Os10g0503700	LOC_Os10g35990	45.11	1	9	18	69	521	57.8815	8.27979
115451055	Os03g0174500	LOC_Os03g07840	45.08	1	16	18	45	488	52.1027	6.84424
115446015	Os02g0460200	LOC_Os02g26210	45.08	1	4	4	11	122	13.5701	8.80713
115455879	Os03g0794500	LOC_Os03g58040	45.01	3	11	15	66	411	44.3137	6.60986
115470799	Os07g0172500	LOC_Os07g07610	45	1	6	6	12	120	14.0692	7.56201
115483853	Os11g0116400	---	44.98	2	9	9	29	229	25.1478	9.02686
115480049	Os09g0507800	LOC_Os09g32976	44.96	1	8	15	70	258	29.2855	10.3452
115446571	Os02g0541700	LOC_Os02g33730	44.93	1	4	4	11	69	8.25789	5.21143
297727905	Os11g0115466	LOC_Os12g02310	44.92	2	3	4	27	118	11.4937	8.52881
297605116	Os06g0132400	LOC_Os06g04150	44.9	1	17	17	61	314	33.7496	9.0708
115488790	Os12g0514500	LOC_Os12g32986	44.88	1	28	36	115	811	91.4232	5.32568
115464481	Os05g0477300	LOC_Os05g39960	44.85	1	1	4	13	136	15.1519	11.019
115474739	Os08g0139200	LOC_Os08g04460	44.83	1	7	8	18	203	21.5758	6.53662
115441829	Os01g0916400	LOC_Os01g68770	44.81	1	18	18	78	482	53.1024	6.07471
115468394	Os06g0538000	LOC_Os06g34690	44.8	2	26	26	76	558	60.8599	6.65381
11466822	rps11	---	44.76	1	5	5	14	143	15.6146	12.0444
297604251	Os05g0314100	LOC_Os05g24970	44.76	2	4	4	16	105	12.0404	9.93506
115439637	Os01g0721900	LOC_Os01g52390	44.74	1	16	18	71	380	40.4018	6.7124
115488938	Os12g0541500	LOC_Os12g35630	44.7	1	47	47	303	1123	121.014	4.70361
115474191	Os07g0687500	LOC_Os07g48810	44.7	1	11	11	41	302	33.123	7.07861
115442401	Os01g0962600	---	44.69	1	3	8	31	179	19.898	9.80322
115470141	Os07g0100200	LOC_Os07g01020	44.65	1	1	15	130	318	33.7153	6.88818
297722587	Os03g0773150	LOC_Os03g56241	44.64	2	4	4	12	56	6.41011	9.90576
297600761	Os03g0289400	---	44.59	1	5	5	16	148	15.4999	9.61279
115480403	Os09g0538200	LOC_Os09g36710	44.58	1	4	11	26	249	27.1972	7.92822
115435022	Os01g0191200	LOC_Os01g09540	44.55	5	14	15	95	303	32.9475	6.80029
115465886	Os06g0103500	LOC_Os06g01390	44.54	1	28	28	91	669	74.347	7.1665
115460466	Os04g0610800	LOC_Os04g52130	44.52	2	15	15	51	310	34.9314	6.07471
115460866	Os04g0639300	LOC_Os04g54640	44.51	1	7	7	20	173	18.8409	6.17627
115474273	Os07g0694000	LOC_Os07g49330	44.48	7	20	23	64	598	67.7403	6.62451
115435934	Os01g0276100	LOC_Os01g16900	44.48	1	15	15	69	362	39.4172	7.43018
297728415	Os11g0532750	---	44.44	1	1	8	1921	108	11.7028	8.00146
297600966	Os03g0366000	LOC_Os03g25050	44.44	1	3	4	15	99	10.942	7.25439
115469408	Os06g0665100	LOC_Os06g45440	44.44	2	11	11	29	261	29.2737	7.28369
115467998	Os06g0356700	LOC_Os06g24990	44.44	1	2	2	7	54	6.2999	7.40088
115464035	Os05g0429400	LOC_Os05g35460	44.44	1	16	24	74	585	63.9086	4.60205
115456077	Os03g0806900	LOC_Os03g59220	44.44	1	5	6	20	126	15.0257	9.5249
115448483	Os02g0731600	LOC_Os02g49870	44.44	1	6	7	48	108	11.7642	5.22412
115444197	Os02g0146600	LOC_Os02g05330	44.44	2	2	20	148	414	47.108	5.66846
115453089	Os03g0358100	LOC_Os03g24380	44.38	1	7	7	22	169	19.2219	8.60205
115474481	Os08g0113100	LOC_Os08g02120	44.35	1	13	13	45	336	35.494	5.17334
115458068	Os04g0388900	LOC_Os04g31950	44.33	2	5	5	14	97	10.2321	8.68994
297720261	Os01g0662200	---	44.3	1	3	8	94	158	16.3178	5.40186
115466010	Os06g0114500	LOC_Os06g02420	44.3	1	4	4	17	79	8.78046	8.77783
115463659	Os05g0388500	LOC_Os05g32220	44.29	1	17	18	136	359	38.7558	7.32764
115439869	Os01g0742500	LOC_Os01g53930	44.27	1	17	19	84	506	55.0864	6.34131
115453873	Os03g0576700	LOC_Os03g37970	44.23	1	3	10	55	208	23.9991	10.9165
115458140	Os04g0398300	LOC_Os04g32650	44.18	1	11	12	48	292	32.4126	5.61768
115456135	Os03g0811100	LOC_Os03g59640	44.16	1	32	32	79	754	81.8285	5.51611
115449209	Os02g0795300	LOC_Os02g55200	44.11	1	4	13	24	365	39.8585	5.73193
115441087	Os01g0851700	LOC_Os01g63270	44.11	1	33	33	133	841	94.4113	7.23975
297603343	Os04g0613600	LOC_Os04g52361	44.1	3	3	8	31	161	17.8246	10.5796
115464313	Os05g0460500	LOC_Os05g38560	44.07	1	1	6	109	118	13.1319	9.45166
115486187	Os11g0603200	LOC_Os11g39020	44.06	1	25	25	66	690	77.6024	6.37939
115461611	Os05g0104800	LOC_Os05g01450	44.01	1	11	11	30	284	31.219	5.47803
115445275	Os02g0244700	LOC_Os02g14770	44.01	2	27	43	144	968	109.863	6.22705
115451211	Os03g0187000	LOC_Os03g08810	43.97	1	8	8	12	232	24.6071	5.47803
115468818	Os06g0602600	LOC_Os06g40040	43.94	1	2	8	29	132	14.5976	5.60498
115467434	Os06g0256500	LOC_Os06g14510	43.92	1	6	20	95	567	62.3291	6.93213
115450485	Os03g0128800	LOC_Os03g03670	43.92	1	12	12	35	378	40.396	6.23975
297595923	Os01g0111100	LOC_Os01g02080	43.88	1	11	11	51	294	30.3682	9.05615
115441203	Os01g0862300	LOC_Os01g64280	43.86	1	16	17	36	399	45.7466	6.58057
115466028	Os06g0115500	LOC_Os06g02510	43.75	1	2	9	46	208	24.0392	10.9897
115449323	Os02g0805200	LOC_Os02g56130	43.73	1	12	12	31	263	29.2525	4.75439
115477483	Os08g0532200	LOC_Os08g41990	43.72	2	18	18	145	478	50.2056	6.94678
115466896	Os06g0194900	LOC_Os06g09450	43.69	1	24	30	109	808	92.071	6.39209
115453619	Os03g0426900	LOC_Os03g31300	43.66	1	36	40	164	978	108.918	6.62451
115439953	Os01g0750800	LOC_Os01g54730	43.66	2	3	3	9	71	8.3623	9.31982
115488718	Os12g0507500	LOC_Os12g32280	43.64	1	3	3	11	55	6.3104	9.49561
115463615	Os05g0382600	LOC_Os05g31750	43.62	1	7	7	19	149	16.3705	7.75244
115440757	Os01g0823300	LOC_Os01g60790	43.61	1	1	4	12	133	14.9818	11.019
115476972	Os08g0484500	LOC_Os08g37790	43.56	1	16	20	56	505	56.3987	8.29443
297728773	Os12g0105950	LOC_Os11g01510/LOC_Os12g01520	43.55	1	1	13	47	310	34.7113	5.21143
115445753	Os02g0313400	LOC_Os02g20930	43.54	1	11	12	36	271	30.1057	10.0229
297721539	Os02g0704800	LOC_Os02g47590	43.53	1	2	2	10	85	9.34661	4.64014
115461160	Os04g0665800	LOC_Os04g57020	43.52	1	12	12	45	301	32.738	6.13818
115487608	Os12g0175500	LOC_Os12g07650	43.51	1	10	10	56	285	30.571	8.29443
115480295	Os09g0529100	LOC_Os09g35970	43.49	1	8	10	31	269	29.0039	5.70654
115439513	Os01g0710000	LOC_Os01g51300	43.49	1	14	14	61	453	50.0798	6.30322
297728247	Os11g0300400	LOC_Os11g19460	43.48	1	1	1	1	46	4.99758	5.09717
297606919	Os07g0224000	LOC_Os07g12250	43.48	2	2	10	30	161	18.2232	10.7114
115444549	Os02g0175400	LOC_Os02g07870	43.48	1	7	26	111	621	68.5479	5.52881
115461408	Os04g0683700	LOC_Os04g58710	43.44	1	19	19	62	518	54.4405	6.99072
297604928	Os05g0566600	LOC_Os05g49160	43.4	2	3	5	12	106	11.807	7.50342
115447981	Os02g0686400	LOC_Os02g46130	43.35	1	21	22	66	549	60.8241	6.31592
115439933	Os01g0749200	LOC_Os01g54540	43.35	1	9	9	42	233	26.228	10.3599
115452845	Os03g0333300	LOC_Os03g21550	43.33	1	3	14	41	270	30.5295	6.93213
297601224	Os03g0579300	---	43.3	1	1	4	57	97	11.2451	10.4038
115464745	Os05g0501700	LOC_Os05g42230	43.28	1	5	8	34	268	28.3041	5.75732
115475541	Os08g0248800	LOC_Os08g15030	43.25	2	16	17	36	363	39.867	7.44482
115468824	Os06g0603000	LOC_Os06g40080	43.25	1	12	12	27	289	31.8981	6.7417
297596194	Os01g0174900	LOC_Os01g07950	43.24	1	2	7	19	185	20.1673	8.00146
194033219	orfB	---	43.23	2	8	8	24	155	18.0535	9.94971
115448323	Os02g0718900	LOC_Os02g48720	43.19	1	7	16	197	382	41.4841	9.77393
115463261	Os05g0334400	LOC_Os05g26902/LOC_Os05g26926	43.18	1	18	18	81	447	48.1848	9.61279
115478398	Os09g0294000	LOC_Os09g12290	43.17	2	28	39	97	915	99.6014	7.37158
115467372	Os06g0247800	LOC_Os06g13820	43.14	2	25	38	94	911	99.1805	9.17334
115444005	Os02g0130100	LOC_Os02g03740	43.14	1	9	9	30	255	27.473	5.49072
115454985	Os03g0719300	LOC_Os03g51000	43.1	1	21	21	49	594	61.7538	5.23682
115448639	Os02g0744000	LOC_Os02g51020	43.09	1	9	9	40	181	20.4711	6.34131
297600386	Os03g0167100	---	43.08	1	4	4	18	65	7.45912	11.1655
115462145	Os05g0151300	LOC_Os05g05940	43.08	1	11	11	26	253	26.8432	6.62451
115481822	Os10g0390500	LOC_Os10g25130	43.06	2	18	19	60	483	52.5599	6.65381
115489194	Os12g0571200	LOC_Os12g38310	43.01	1	4	4	12	93	10.8322	6.11279
115444791	Os02g0194100	LOC_Os02g10070	43.01	1	2	15	42	472	52.1961	7.37158
115463181	Os05g0320700	LOC_Os05g25640	43	6	18	18	37	500	56.847	8.89502
115457852	Os04g0349500	LOC_Os04g28180	42.99	1	3	10	50	221	24.9133	10.4038
297610214	Os10g0194200	LOC_Os10g11810	42.98	2	14	14	42	356	38.6311	6.37939
297601604	Os03g0722600	LOC_Os03g51250	42.98	2	14	14	42	342	36.0407	9.21729
115470733	Os07g0165000	LOC_Os07g07060	42.97	1	14	14	43	377	42.4076	6.90283
115443809	Os02g0117100	LOC_Os02g02520	42.97	1	15	15	51	377	41.8653	7.03467
115453025	Os03g0350300	---	42.96	1	5	22	55	568	62.593	8.86572
115447561	Os02g0643500	LOC_Os02g42960	42.96	1	8	8	66	277	28.9424	8.73389
115454773	Os03g0699300	LOC_Os03g49220	42.94	1	16	18	52	489	52.6412	6.91748
115461739	Os05g0116000	LOC_Os05g02520	42.9	2	12	12	58	359	38.1706	6.16357
297724279	Os05g0536400	LOC_Os05g45954	42.86	1	3	3	12	91	9.79409	8.88037
115448989	Os02g0774300	LOC_Os02g53420	42.86	1	10	27	134	679	72.8527	5.59229
115434496	Os01g0144700	---	42.86	1	3	3	4	91	9.60219	11.2241
115457630	Os04g0304200	LOC_Os04g23890	42.8	1	26	29	86	771	86.3527	8.23584
115444173	Os02g0143100	LOC_Os02g05030	42.79	1	12	17	88	423	47.2248	5.8208
115479135	Os09g0413100	LOC_Os09g24660	42.77	1	7	7	15	159	17.8301	7.03467
115443887	Os02g0122000	LOC_Os02g02960	42.76	1	7	7	12	152	17.1329	9.53955
115462265	Os05g0163000	LOC_Os05g07030	42.74	2	24	24	76	606	68.2468	6.26514
115477805	Os08g0558900	LOC_Os08g44460	42.7	1	5	6	27	89	9.80101	9.70068
115437210	Os01g0530400	---	42.7	1	2	7	23	185	20.1341	6.93213
297727019	Os09g0461800	LOC_Os09g28730	42.68	1	10	10	22	321	34.1801	5.63037
115474063	Os07g0677400	LOC_Os07g48040	42.68	1	9	10	28	314	32.4172	7.6499
115474139	Os07g0684000	LOC_Os07g48500	42.65	1	4	9	24	204	22.807	7.81104
297597666	Os01g0764900	---	42.64	1	14	14	44	462	50.5617	5.36377
115470307	Os07g0114400	LOC_Os07g02350	42.64	1	4	12	24	333	39.3173	8.47021
115468870	Os06g0607800	LOC_Os06g40560	42.64	1	2	14	37	401	44.5534	8.32373
115474235	Os07g0691200	LOC_Os07g49110	42.6	1	36	36	147	946	103.33	5.63037
115450595	Os03g0136900	LOC_Os03g04410	42.6	3	37	37	142	986	106.235	6.90283
115443751	Os02g0111700	LOC_Os08g03450	42.55	2	1	5	17	94	10.7876	11.8687
115476198	Os08g0382400	LOC_Os08g29370	42.49	1	17	17	88	426	46.4528	4.94482
115468042	Os06g0472000	LOC_Os06g27760	42.45	1	6	6	15	212	23.2053	9.27588
115441607	Os01g0896800	---	42.43	1	16	16	117	304	34.7078	9.17334
115443639	Os02g0102700	LOC_Os02g01250	42.42	1	4	4	19	132	14.2716	11.063
115448905	Os02g0767500	---	42.39	3	3	15	91	368	38.9341	9.27588
115450215	Os03g0109500	LOC_Os03g01900	42.36	1	3	8	24	144	16.6048	10.3306
11466793	atpE	---	42.34	1	3	4	58	137	15.2081	5.09717
115453811	Os03g0566800	---	42.33	3	17	20	69	404	45.5996	6.3667
115439405	Os01g0700000	LOC_Os01g50450	42.31	1	9	9	23	260	27.4054	4.75439
115477976	Os09g0115400	LOC_Os09g02700	42.3	1	21	25	91	662	71.5845	6.82959
115464123	Os05g0438800	LOC_Os05g36290	42.29	1	8	13	93	376	41.5807	5.47803
115461036	Os04g0656100	LOC_Os04g56160	42.27	1	23	40	255	951	104.752	6.78564
115489492	Os12g0607100	LOC_Os12g41400	42.24	2	16	16	44	464	50.7048	8.6167
115465131	Os05g0536900	LOC_Os05g46000	42.23	1	1	8	23	206	23.1376	6.99072
115472631	Os07g0545300	---	42.22	3	3	6	30	135	14.0356	10.0522
297725447	Os07g0188233	---	42.2	1	8	8	39	218	22.65	9.71533
115448201	Os02g0708100	LOC_Os02g47850	42.2	1	16	16	49	410	44.1915	7.7085
115439983	Os01g0753100	LOC_Os01g54940	42.19	1	13	13	36	365	38.7905	9.08545
297723323	Os04g0531750	LOC_Os04g44924	42.16	2	3	8	13	185	19.9943	6.32861
297721689	Os02g0815001	LOC_Os02g56990	42.11	1	1	5	17	95	10.7567	11.7368
115472785	Os07g0562700	LOC_Os07g37550	42.11	1	8	9	156	266	28.7597	6.21436
115488436	Os12g0443500	LOC_Os12g25690	42.08	3	1	16	35	480	52.8211	6.12549
115477461	Os08g0530400	LOC_Os08g41830	42.07	2	17	17	43	397	43.7524	8.03076
115475992	Os08g0342400	LOC_Os08g25390	42.07	1	20	31	74	763	82.7036	6.04932
297609103	Os09g0249900	LOC_Os09g07570	42.03	1	10	10	55	207	22.6823	9.01221
115477843	Os08g0562100	LOC_Os08g44810	42.03	1	18	18	87	433	46.9792	7.29834
115465151	Os05g0539700	LOC_Os05g46230	42.03	1	15	16	58	364	41.658	4.4624
115456053	Os03g0805300	LOC_Os03g59060	42.02	1	3	9	26	307	35.2201	5.32568
297601716	Os03g0758100	---	41.96	1	22	22	68	591	67.1627	5.64307
115489574	Os12g0615400	LOC_Os12g42090	41.95	1	13	13	101	348	38.9151	9.5249
297607988	Os08g0154700	---	41.94	1	3	3	8	93	10.7306	7.44482
115465467	Os05g0564400	LOC_Os05g48980	41.94	3	2	9	20	217	24.0711	5.89697
115470493	Os07g0134800	LOC_Os07g04240	41.9	1	21	21	81	630	68.8101	7.07861
115482342	Os10g0457600	LOC_Os10g31950	41.87	1	15	15	45	461	47.9947	8.104
297601423	Os03g0659300	LOC_Os03g45720	41.84	1	4	4	21	141	15.1647	5.79541
115459338	Os04g0508200	LOC_Os04g42920	41.84	1	14	20	66	478	53.5236	8.39697
297601669	Os03g0744600	LOC_Os03g53270	41.83	1	8	8	30	251	26.4162	6.52197
115484239	Os11g0153700	LOC_Os11g05556	41.83	1	21	22	77	557	61.1812	9.74463
115468882	Os06g0608500	LOC_Os06g40620	41.82	1	6	8	14	220	24.2122	4.91943
115445891	Os02g0332200	LOC_Os02g22780	41.76	2	20	20	51	534	57.7117	6.99072
115474005	Os07g0671800	LOC_Os07g47510	41.75	1	11	11	34	297	31.9962	9.26123
115461074	Os04g0659500	LOC_Os04g56450	41.74	1	8	10	22	242	26.1741	5.24951
115453075	Os03g0355900	LOC_Os03g23980	41.74	1	10	10	33	333	35.9995	7.03467
115467944	Os06g0342200	LOC_Os06g23440	41.67	1	6	8	27	144	16.3291	5.35107
115453693	Os03g0438100	LOC_Os03g32314	41.67	1	10	10	30	240	26.0345	9.23193
115456930	Os04g0119400	LOC_Os04g02900	41.65	2	17	17	45	425	46.1152	6.60986
115451513	Os03g0212700	LOC_Os03g11410	41.65	1	20	20	99	533	58.7149	5.75732
115442403	Os01g0962700	LOC_Os01g73170	41.64	2	9	12	48	377	39.6134	7.63525
297605331	Os06g0186900	LOC_Os06g08770	41.6	1	18	18	38	476	51.811	5.96045
115479005	Os09g0394900	LOC_Os09g23160	41.59	1	13	13	27	315	35.6433	8.79248
115438617	Os01g0618100	LOC_Os01g43090	41.57	1	13	14	45	344	37.8916	6.72705
115476474	Os08g0424500	LOC_Os08g32870	41.55	1	14	15	53	503	54.6479	5.45264
115456393	Os03g0831800	LOC_Os03g61630	41.53	1	8	11	25	301	32.0518	5.74463
115465267	Os05g0549100	LOC_Os05g47560	41.5	1	23	23	66	559	62.3476	9.26123
115476562	Os08g0434100	LOC_Os08g33710	41.48	1	8	8	21	229	24.7838	5.16064
115445047	Os02g0218200	LOC_Os02g12650	41.46	1	32	33	120	878	98.391	5.19873
115459540	Os04g0527800	LOC_Os04g44560	41.42	1	11	11	22	338	37.4849	7.43018
115475824	Os08g0308100	LOC_Os08g21660	41.41	2	12	12	33	326	36.3563	6.39209
115433990	Os01g0102900	LOC_Os01g01340	41.41	1	3	3	17	128	13.3085	4.51318
115471711	Os07g0413800	LOC_Os07g23120	41.4	2	9	9	13	285	31.8686	5.13525
115471321	Os07g0239400	LOC_Os07g13530	41.4	4	1	11	36	215	23.9783	7.81104
115461214	Os04g0669800	LOC_Os04g57400	41.4	1	15	15	40	430	48.3824	6.53662
115470709	Os07g0163500	LOC_Os07g06940	41.38	1	15	15	35	319	36.0016	5.47803
297600196	Os03g0105600	LOC_Os03g01530	41.35	1	2	4	18	133	14.6309	4.86865
297599567	Os02g0606100	---	41.3	1	6	6	13	138	14.9287	9.64209
115482810	Os10g0503500	LOC_Os10g35960	41.29	1	24	24	80	620	68.2359	8.33838
115480447	Os09g0541900	LOC_Os09g37000	41.27	1	8	19	46	487	54.9468	8.5874
115483236	Os10g0545700	LOC_Os10g39860	41.25	2	7	7	14	160	17.6937	8.76318
115435706	Os01g0253300	LOC_Os01g14950	41.25	1	12	17	48	526	57.5347	5.22412
115477954	Os09g0110400	LOC_Os09g02284	41.21	1	10	10	23	330	36.4373	4.88135
297612110	Os11g0592700	LOC_Os11g38020	41.18	1	3	3	6	51	6.00516	9.70068
115456349	Os03g0828100	LOC_Os03g61260	41.18	1	7	8	45	170	18.1288	10.3159
115449641	Os02g0816800	LOC_Os02g55670/LOC_Os02g55720/LOC_Os02g55770/LOC_Os02g57180	41.18	2	16	16	55	408	44.2809	9.20264
115443785	Os02g0115600	LOC_Os02g02390	41.18	1	30	30	72	799	88.198	5.12256
115441775	Os01g0913000	LOC_Os01g68480	41.18	1	7	7	42	187	19.7343	8.54346
115450109	Os03g0101600	LOC_Os03g01190	41.16	1	12	12	36	328	34.7851	7.23975
297721839	Os03g0176600	LOC_Os03g07960	41.13	1	8	8	24	231	24.7579	8.25049
115470553	Os07g0143000	LOC_Os07g05000	41.11	2	12	14	62	377	40.5761	8.33838
115461693	Os05g0111200	LOC_Os05g02060	41.1	1	7	7	17	146	15.6059	8.60205
115448843	Os02g0762100	LOC_Os02g52450	41.07	1	6	7	18	168	17.7754	6.53662
115483466	Os10g0563600	LOC_Os10g41400	41.06	1	8	9	62	263	28.6211	8.35303
115463803	Os05g0404200	LOC_Os05g33510	41.05	1	9	9	37	229	24.6692	8.55811
297604962	Os05g0580000	LOC_Os05g50380	41.04	1	19	19	48	519	57.6169	6.78564
115434012	Os01g0104400	LOC_Os01g01450	41.04	1	7	10	47	268	30.1273	6.771
115474909	Os08g0161700	LOC_Os08g06430	41.03	1	5	5	18	117	12.5185	9.0708
115436372	Os01g0338600	LOC_Os01g23680	40.99	1	10	10	44	283	31.0139	7.31299
115454645	Os03g0685000	LOC_Os03g48040	40.98	1	5	5	13	183	19.9129	6.37939
115436616	Os01g0372700	LOC_Os01g27520	40.97	1	25	25	100	559	62.5491	5.93506
297612744	Os12g0169400	LOC_Os12g07190	40.96	2	15	15	53	542	58.2673	6.96143
297602611	Os04g0390000	LOC_Os04g32020	40.96	1	25	35	114	1001	113.89	6.72705
115451919	Os03g0249400	LOC_Os03g14530	40.94	1	1	6	39	127	13.9496	9.46631
115447507	Os02g0638300	LOC_Os02g42570	40.94	1	6	6	39	149	16.2657	9.5835
115463469	Os05g0367000	---	40.91	1	5	5	15	110	12.406	8.41162
115485775	Os11g0538900	LOC_Os11g33240	40.89	1	2	15	48	472	52.3293	7.88428
115463343	Os05g0349500	LOC_Os05g28190	40.89	1	19	19	66	472	49.6588	4.76709
115457342	Os04g0223300	LOC_Os04g14680	40.89	1	9	13	91	291	32.0274	8.19189
115478779	Os09g0361400	LOC_Os09g19734	40.88	1	10	10	46	274	29.2021	7.66455
115448029	Os02g0690800	LOC_Os02g46520	40.86	1	16	16	42	443	48.6469	5.36377
115477813	Os08g0559400	---	40.85	1	7	7	20	164	18.0721	8.42627
115454415	Os03g0656100	LOC_Os03g45340	40.85	1	5	5	18	164	17.5332	9.56885
115447473	Os02g0634900	LOC_Os02g42320	40.85	1	2	9	26	235	25.8283	5.47803
297596073	Os01g0138900	LOC_Os01g04630	40.81	1	13	13	25	446	46.6012	6.02393
115487678	Os12g0183300	LOC_Os12g08280	40.78	1	14	14	38	358	37.457	4.7417
115458184	Os04g0402100	LOC_Os04g32950	40.78	1	23	23	82	537	60.6917	4.83057
115478801	Os09g0363700	LOC_Os09g19910	40.77	1	4	4	11	130	14.6482	6.52197
115481970	Os10g0410600	LOC_Os10g27050	40.76	1	4	9	23	314	35.6023	5.18604
115467830	Os06g0320700	LOC_Os06g21600	40.73	2	24	24	65	626	69.4523	6.72705
115452819	Os03g0331600	LOC_Os03g21370	40.69	1	6	6	26	145	16.4117	9.53955
11466780	rps2	---	40.68	1	10	10	37	236	26.9754	9.90576
115457484	Os04g0270200	LOC_Os04g20230	40.67	2	8	8	24	209	22.7089	6.91748
115471033	Os07g0195100	LOC_Os07g09680	40.66	3	5	11	37	273	30.2807	9.979
115449677	Os02g0818000	LOC_Os02g57280	40.64	1	7	7	19	187	20.4716	5.14795
115477376	Os08g0524000	LOC_Os08g41250	40.63	1	8	8	12	256	28.2899	7.89893
115453295	Os03g0383800	LOC_Os03g26630	40.63	2	10	10	36	288	31.6204	9.02686
115434592	Os01g0153400	LOC_Os01g06020	40.63	1	16	16	48	384	43.0908	5.23682
115483600	Os10g0573400	---	40.57	1	6	6	13	212	23.0697	5.74463
194033258	nad9	---	40.53	1	9	9	28	190	22.9154	8.00146
115452153	Os03g0269100	LOC_Os03g16230	40.52	1	9	11	19	269	28.7384	6.90283
115445217	Os02g0236000	LOC_Os02g14110	40.51	2	8	16	60	432	48.077	7.97217
115454109	Os03g0611200	LOC_Os03g41510	40.49	1	14	14	55	405	45.6353	8.03076
115450395	Os03g0122200	LOC_Os03g03020	40.48	1	9	9	42	210	21.9411	9.83252
115480733	Os09g0567300	---	40.46	1	11	19	109	435	46.6441	5.70654
115446695	Os02g0556100	LOC_Os02g35039	40.41	1	11	11	27	292	31.1865	9.56885
115456900	Os04g0117100	LOC_Os04g02670	40.38	1	2	2	5	52	5.28691	10.1255
115456475	Os03g0838900	---	40.37	1	7	7	17	218	24.5466	8.74854
115479659	Os09g0467200	LOC_Os09g29200	40.36	1	9	9	49	223	25.17	5.70654
115470849	Os07g0176900	LOC_Os07g08030	40.36	1	9	9	93	280	29.1793	5.74463
115455105	Os03g0729200	LOC_Os03g51950	40.31	1	8	8	25	258	27.1909	7.6792
115451599	Os03g0219300	LOC_Os03g11970	40.31	1	9	15	42	449	50.0289	5.24951
115443643	Os02g0102900	LOC_Os02g01280	40.3	1	11	23	120	598	63.7586	5.90967
115474365	Os08g0104600	LOC_Os08g01380	40.29	1	4	4	455	139	14.9414	4.56396
115477326	Os08g0519400	LOC_Os08g40790	40.27	2	22	22	48	452	50.8263	9.39307
115457372	Os04g0227500	LOC_Os04g15690	40.27	1	10	10	46	226	24.8427	8.5874
115465623	Os05g0578000	LOC_Os05g50220	40.22	1	8	8	17	271	29.8552	4.66553
297724655	Os06g0245800	LOC_Os06g13660	40.18	1	14	14	49	326	36.3307	5.17334
115445207	Os02g0234800	LOC_Os02g13990	40.14	1	11	11	25	284	31.9797	5.14795
115453023	Os03g0350100	---	40.11	1	3	20	46	556	60.9702	8.82178
115448199	Os02g0707900	LOC_Os02g47840	40.11	1	6	6	14	177	19.8619	6.41748
115442127	Os01g0938900	LOC_Os01g71230	40.1	1	5	8	34	202	22.0789	4.55127
115436500	Os01g0357100	LOC_Os01g25484	40.07	1	10	22	90	594	65.8288	7.43018
115446411	Os02g0523500	LOC_Os02g32350	40.06	2	36	36	100	986	108.115	6.88818
115461348	Os04g0678700	LOC_Os04g58200	40.05	1	19	19	40	387	41.1575	9.5835
115473357	Os07g0616600	LOC_Os07g42450	40	1	11	11	77	305	32.9514	5.08447
115453489	Os03g0410900	LOC_Os03g29740	40	1	2	3	16	80	8.88265	9.18799
115440541	Os01g0803200	---	40	1	8	8	27	140	15.3459	5.84619
115474869	Os08g0157500	LOC_Os08g06100	39.95	1	13	13	34	368	39.7238	5.65576
297598314	Os01g0946500	LOC_Os01g71810	39.94	2	9	9	34	318	34.1319	5.2749
115454593	Os03g0679700	LOC_Os03g47610	39.91	1	22	23	86	639	71.2506	6.43018
115468634	Os06g0571400	LOC_Os06g37440	39.9	1	7	15	130	416	47.36	6.46826
115445357	Os02g0254700	LOC_Os02g15550	39.9	1	6	7	20	193	21.5247	5.03369
115436368	Os01g0338000	LOC_Os01g23620	39.9	2	3	7	18	193	21.9704	7.53271
115462177	Os05g0155100	LOC_Os05g06310	39.89	1	6	7	23	188	21.2978	11.3999
115452503	Os03g0299900	LOC_Os03g18810	39.87	1	15	16	87	464	49.8263	8.41162
115478418	Os09g0297100	LOC_Os09g12570	39.86	3	5	6	11	148	16.6892	6.93213
115439653	Os01g0723200	LOC_Os01g52490	39.86	1	3	5	17	138	15.7088	10.5649
115454413	Os03g0655700	LOC_Os03g45320	39.85	1	12	13	44	389	41.1972	5.40186
115453243	Os03g0376800	LOC_Os03g25970	39.85	1	17	17	35	542	57.8081	6.88818
115466228	Os06g0134000	LOC_Os06g04290	39.84	1	3	6	26	128	14.0375	9.43701
115469824	Os06g0704700	LOC_Os06g49120	39.81	1	23	23	68	648	69.7609	8.90967
115474565	Os08g0120500	LOC_Os08g02690	39.8	1	22	25	70	716	78.5352	5.26221
115435028	Os01g0191500	LOC_Os01g09560	39.8	1	18	18	85	505	53.9127	7.13721
115465801	Os05g0593100	LOC_Os05g51530	39.79	2	18	18	48	377	42.6517	5.64307
115436652	Os01g0377700	LOC_Os01g27990	39.76	1	17	17	39	415	44.8633	5.5415
115487952	Os12g0236500	LOC_Os12g13390	39.75	1	17	17	44	478	52.4105	6.91748
115460460	Os04g0610500	LOC_Os04g52100	39.71	2	12	13	28	340	37.1109	7.86963
115471803	Os07g0435100	LOC_Os07g25420	39.7	1	9	9	20	267	30.7526	5.07178
115489652	Os12g0623900	LOC_Os12g42876	39.69	1	5	29	168	766	84.5315	6.30322
115467898	Os06g0332800	LOC_Os06g22690	39.69	1	4	4	23	131	13.6126	8.32373
11466845	rpl32	---	39.68	1	2	2	14	63	7.31101	11.7661
115489068	Os12g0561000	LOC_Os12g37419	39.68	1	3	3	14	63	6.97365	8.88037
115455667	Os03g0776000	LOC_Os03g56460	39.68	1	5	19	87	567	62.4844	7.28369
115448011	Os02g0689700	LOC_Os02g46440	39.66	1	2	2	2	58	6.48539	5.33838
115441603	Os01g0896500	LOC_Os01g67120	39.65	1	23	23	99	623	65.0074	5.17334
297602897	Os04g0473400	LOC_Os04g39700	39.64	1	7	10	44	222	24.6134	10.0962
115477733	Os08g0553800	LOC_Os08g44000	39.64	1	15	15	61	386	42.7954	8.74854
115434484	Os01g0143800	LOC_Os01g05060	39.64	1	8	8	38	275	29.7887	4.56396
115445841	Os02g0325100	LOC_Os02g21970	39.62	2	13	16	48	419	46.426	6.07471
115438604	Os01g0617500	LOC_Os01g43030	39.6	2	33	33	93	909	103.652	6.46826
115478426	Os09g0298200	LOC_Os09g12660	39.6	1	9	16	73	500	54.81	6.66846
115475758	Os08g0295300	LOC_Os08g19850	39.6	1	29	29	69	745	84.8925	7.97217
115459064	Os04g0485300	LOC_Os04g40874	39.6	3	16	17	56	505	57.6626	6.96143
115452657	Os03g0313600	LOC_Os03g19930	39.59	2	18	18	57	543	60.1438	6.20166
115452469	Os03g0297100	LOC_Os03g18570	39.58	2	4	6	32	192	22.169	9.78857
115471693	Os07g0410100	LOC_Os07g22720	39.56	1	13	19	72	541	58.7352	8.41162
115456345	Os03g0827700	LOC_Os03g61220	39.56	1	24	24	91	723	78.3839	6.65381
115474101	Os07g0681000	LOC_Os07g48300	39.55	1	2	13	33	268	30.4756	6.41748
115453943	Os03g0586800	LOC_Os03g38980	39.53	1	23	23	74	602	68.3435	6.20166
115452733	Os03g0322500	LOC_Os03g20630	39.53	1	5	5	21	129	14.1865	6.37939
115486179	Os11g0602600	LOC_Os11g38959	39.49	2	8	8	40	195	22.6591	10.2866
115480377	Os09g0535900	LOC_Os09g36520	39.47	1	12	12	48	337	37.4782	6.94678
115468796	Os06g0598900	LOC_Os06g39760	39.47	1	7	11	29	342	37.2402	5.73193
115446545	Os02g0538000	LOC_Os02g33500	39.47	1	25	25	74	674	76.8894	6.88818
115488594	Os12g0485800	LOC_Os12g30060	39.46	1	6	7	16	147	16.4353	5.26221
115452151	Os03g0269000	LOC_Os03g16220	39.44	1	6	8	22	213	23.298	8.88037
115469620	Os06g0687700	LOC_Os06g47320	39.4	1	10	10	24	302	32.3534	6.39209
115466524	Os06g0157800	LOC_Os06g06330	39.34	1	6	6	14	122	12.361	6.80029
115461953	Os05g0135800	LOC_Os05g04520	39.34	5	9	12	37	361	39.2861	7.79639
115452259	Os03g0278900	LOC_Os03g17070	39.34	1	11	11	161	211	22.7152	5.84619
115470699	Os07g0162500	LOC_Os07g06840	39.33	2	12	12	34	328	35.0398	5.64307
115451355	Os03g0198400	LOC_Os03g10190	39.33	1	5	19	50	445	50.5637	6.30322
115485233	Os11g0414000	LOC_Os11g21990	39.32	1	16	16	43	412	47.2798	5.45264
115454539	Os03g0670700	LOC_Os03g46770	39.29	1	3	6	50	196	20.3627	7.25439
115442509	Os01g0971500	LOC_Os01g73990	39.26	1	1	4	17	135	15.0096	5.30029
115478691	Os09g0346500	---	39.25	1	2	7	589	265	27.9962	5.26221
115459904	Os04g0561500	LOC_Os04g47360	39.24	1	24	25	72	739	82.6388	6.02393
115438082	Os01g0591000	LOC_Os01g40860	39.24	1	18	21	74	502	54.1368	6.91748
115486898	Os12g0106000	LOC_Os11g01530/LOC_Os12g01530	39.22	2	10	10	48	255	28.1484	5.66846
115439109	Os01g0673600	LOC_Os01g48280	39.22	1	5	5	16	153	17.149	7.34229
115463079	Os05g0302700	LOC_Os05g23720	39.21	1	7	16	163	380	40.951	9.74463
115450775	Os03g0151900	LOC_Os03g05740	39.2	1	3	7	18	199	21.635	6.34131
115442343	Os01g0958100	LOC_Os01g72800	39.19	1	12	12	43	347	37.6529	8.104
115466186	Os06g0130800	LOC_Os06g04020	39.17	1	9	9	54	240	25.1647	10.2866
115440917	Os01g0837500	LOC_Os01g62040	39.12	2	16	16	33	455	49.6381	5.59229
115461390	Os04g0682300	LOC_Os04g58580	39.11	1	9	9	17	248	28.1751	5.8335
115478641	Os09g0338400	LOC_Os09g16910	39.08	1	16	16	67	458	49.9937	7.29834
115469284	Os06g0653800	LOC_Os06g44370	39.07	1	12	12	28	343	38.177	7.78174
115478186	Os09g0253000	LOC_Os09g07920	39.02	1	3	3	9	82	8.74517	6.59521
115473497	Os07g0627800	LOC_Os07g43470	39.02	1	14	14	19	369	41.1929	8.48486
115463619	Os05g0383000	LOC_Os05g31770	39.02	2	4	6	11	164	17.8823	7.86963
115449661	Os02g0817500	LOC_Os02g57240	39.02	1	14	14	47	328	36.4266	7.40088
115466316	Os06g0141100	LOC_Os06g04910	39.01	1	15	15	27	405	43.9292	6.88818
115477393	Os08g0525600	LOC_Os08g41390	38.97	1	26	28	88	580	64.0818	5.23682
297728509	Os11g0573000	LOC_Os11g36470	38.97	1	2	14	33	290	33.9308	6.20166
297606021	Os06g0566100	LOC_Os06g37000	38.95	1	7	9	20	285	29.1067	9.39307
115466468	Os06g0152100	LOC_Os06g05880	38.93	1	5	5	30	131	14.1239	4.86865
297613618	Os12g0640600	LOC_Os12g44310	38.89	1	19	19	79	540	60.9807	6.23975
115459906	Os04g0561600	LOC_Os04g47370	38.89	1	9	9	16	234	26.4537	9.27588
115445075	Os02g0220500	LOC_Os02g12794/LOC_Os02g12800	38.89	1	5	16	137	414	46.8999	6.72705
115481716	Os10g0369000	LOC_Os10g22380	38.85	1	17	31	75	713	80.8365	7.62061
115487538	Os12g0168700	LOC_Os12g07110	38.83	2	22	24	94	698	76.6979	7.40088
115465579	Os05g0574400	LOC_Os05g49880	38.82	1	5	14	96	340	35.4137	8.104
115454449	Os03g0661300	LOC_Os03g45920	38.79	1	2	14	61	446	49.6016	4.89404
115455267	Os03g0743900	LOC_Os03g53230	38.78	1	15	19	56	477	52.367	8.66064
297603114	Os04g0543900	LOC_Os04g45970	38.76	2	3	7	22	178	19.3029	7.18115
115475700	Os08g0282400	LOC_Os08g18110	38.75	1	10	10	22	289	32.4651	5.17334
115479383	Os09g0441400	LOC_Os09g26960	38.72	4	17	17	31	514	58.0325	8.77783
115482422	Os10g0466300	LOC_Os10g32880	38.71	1	18	18	60	527	57.7802	6.39209
115479375	Os09g0440300	LOC_Os09g26880	38.7	1	19	19	76	509	54.4669	7.06396
115482468	Os10g0471300	LOC_Os10g33270	38.69	1	7	7	36	168	18.5963	5.88428
115463405	Os05g0358400	LOC_Os05g29020	38.64	1	10	10	18	308	33.9692	7.75244
115459940	Os04g0564600	LOC_Os04g47690	38.64	1	7	7	63	132	13.9939	8.20654
115483088	Os10g0530500	LOC_Os10g38710	38.63	1	7	8	40	233	24.743	5.47803
115482238	Os10g0445600	LOC_Os10g30870	38.59	1	16	16	91	469	51.5284	5.61768
115447465	Os02g0634500	LOC_Os02g42290	38.59	1	6	8	94	298	31.9405	7.2251
297595892	Os01g0104100	LOC_Os01g01420/LOC_Os02g55200	38.57	1	3	12	27	363	39.7625	5.63037
297727709	Os10g0492000	LOC_Os10g35010	38.56	1	5	6	37	153	17.6153	9.39307
115488438	Os12g0443600	LOC_Os12g25700	38.54	4	1	16	35	480	52.8852	6.12549
115445085	Os02g0221500	LOC_Os02g12850	38.54	1	9	11	35	397	40.2406	5.94775
115458342	Os04g0418000	LOC_Os04g34100	38.53	1	8	8	39	231	24.5677	8.646
297601763	Os03g0774300	LOC_Os03g56310	38.51	1	13	13	60	348	40.4395	8.63135
115452585	Os03g0307100	LOC_Os03g19410	38.49	1	30	30	140	938	103.83	5.94775
115482858	Os10g0508400	LOC_Os10g36470	38.46	1	14	14	28	390	43.551	7.38623
115466694	Os06g0174400	LOC_Os06g07780	38.46	1	6	6	13	221	24.9539	9.62744
297602927	Os04g0480100	---	38.44	1	12	14	43	398	42.4619	9.53955
115471101	Os07g0205700	LOC_Os07g10540	38.44	1	24	24	74	718	78.5454	6.26514
11466814	clpP	---	38.43	3	7	7	36	216	24.6982	4.80518
297611970	Os11g0544800	LOC_Os11g34210	38.42	1	20	20	76	544	60.0589	6.31592
115471093	Os07g0204900	LOC_Os07g10490	38.41	1	22	22	80	578	63.6888	8.41162
115450571	Os03g0135300	LOC_Os03g04260	38.39	1	9	9	44	224	24.9736	6.07471
115467546	Os06g0274000	LOC_Os06g16270	38.38	1	3	3	8	99	10.4739	4.36084
115463749	Os05g0399100	LOC_Os05g33100	38.38	1	11	11	35	284	30.8977	6.72705
115438621	Os01g0618400	LOC_Os01g43120	38.38	1	14	20	58	594	65.594	9.59814
115488884	Os12g0534100	LOC_Os12g34880	38.37	1	5	5	14	172	18.3471	5.33838
115456922	Os04g0118900	LOC_Os04g02870	38.37	1	7	8	17	245	28.7665	9.93506
115447403	Os02g0626100	---	38.37	1	17	25	52	701	75.4509	6.49365
297608655	Os08g0447000	LOC_Os08g34720	38.36	1	4	7	18	219	23.6874	7.45947
115445103	Os02g0223700	LOC_Os02g13060	38.36	1	6	6	13	232	23.4537	10.0669
297727117	Os09g0491852	LOC_Os09g31514	38.33	1	12	13	40	347	38.6332	5.04639
115461056	Os04g0658300	LOC_Os04g56320	38.32	1	14	15	162	441	49.0571	6.37939
115456129	Os03g0810600	LOC_Os03g59590	38.32	2	21	21	68	642	71.3266	5.69385
115454659	Os03g0685900	---	38.3	1	4	4	11	94	11.1424	8.22119
115474427	Os08g0109300	LOC_Os08g01770	38.28	1	11	12	71	290	31.7969	7.92822
297722593	Os03g0783000	---	38.27	1	4	4	9	162	17.6529	4.62744
115487804	Os12g0207600	LOC_Os04g16728/LOC_Os12g34550	38.27	2	4	23	9990	520	58.9942	8.85107
115456709	Os03g0857400	LOC_Os03g64020	38.27	1	11	11	63	324	35.97	5.07178
115440671	Os01g0815800	LOC_Os01g59990	38.27	2	1	8	28	162	18.4423	10.7847
115475912	Os08g0326600	LOC_Os08g23730	38.24	1	17	17	44	544	59.5487	6.53662
115479657	Os09g0467100	LOC_Os09g29190	38.21	1	13	13	30	403	44.1345	6.46826
115474879	Os08g0158500	LOC_Os08g06200	38.2	2	14	14	38	377	41.9018	7.51807
297728769	Os12g0105375	LOC_Os12g01449	38.16	1	1	5	8	152	17.5251	9.49561
297604606	Os05g0456300	LOC_Os05g38230	38.14	2	9	13	46	312	34.4058	6.85889
115454911	Os03g0711400	LOC_Os03g50340	38.1	1	11	45	115	1218	136.294	6.90283
115464965	Os05g0522500	LOC_Os05g44760	38.07	1	14	17	80	507	54.6243	6.11279
115454135	Os03g0617900	LOC_Os03g42110	38.07	2	13	13	28	415	44.7582	8.39697
115488206	Os12g0287300	LOC_Os12g18900	38.04	1	11	11	25	326	35.5581	5.99854
297602829	Os04g0451900	LOC_Os04g37904	38	1	4	4	6	100	11.1008	6.69775
115485537	Os11g0484500	LOC_Os11g29400	37.99	1	15	18	58	508	54.2659	6.46826
115446491	Os02g0532500	LOC_Os02g32980	37.99	1	7	7	11	229	24.3025	8.33838
115453565	Os03g0421400	LOC_Os03g30790	37.97	1	11	11	25	266	30.9888	6.88818
115446753	Os02g0564000	LOC_Os02g35590	37.97	1	10	10	26	237	26.2565	7.1958
115448649	Os02g0744700	LOC_Os02g51070	37.96	1	19	20	66	677	74.1041	6.50732
115456091	Os03g0807900	LOC_Os03g59320	37.95	1	6	6	16	195	22.2124	9.64209
115458836	Os04g0464500	LOC_Os04g39040	37.94	1	10	10	31	311	33.0023	5.5415
115476652	Os08g0444100	---	37.93	2	3	3	6	87	10.1538	5.36377
115441247	Os01g0866100	LOC_Os01g64630	37.93	1	1	6	72	203	22.4827	5.35107
115455043	Os03g0724500	LOC_Os03g51459	37.89	2	3	3	7	95	10.5241	6.52197
115455945	Os03g0799000	LOC_Os03g58470	37.88	1	12	12	71	293	29.6121	10.7554
297612477	Os11g0707800	LOC_Os11g48040	37.87	1	11	11	39	301	32.071	9.43701
115477166	Os08g0504500	---	37.86	1	8	8	47	243	25.495	7.43018
297603837	Os05g0150000	LOC_Os05g05740	37.85	1	7	7	15	214	23.0137	5.97314
115449145	Os02g0789400	LOC_Os02g54770	37.84	2	6	8	19	185	21.0106	11.2388
115453947	Os03g0587000	LOC_Os03g39000	37.83	1	12	12	30	267	28.9547	5.68115
115476758	Os08g0459600	LOC_Os08g35740	37.82	1	13	13	33	394	43.6501	8.55811
115453797	Os03g0565200	LOC_Os03g36750	37.81	1	13	13	95	320	33.6815	8.07471
115443603	Os02g0100300	LOC_Os02g01030	37.75	1	17	17	50	408	44.1233	5.12256
115489654	Os12g0624000	LOC_Os12g42884	37.73	1	4	28	164	766	84.6124	6.30322
115450273	Os03g0113700	LOC_Os03g02260	37.72	1	9	25	100	676	72.5206	5.88428
115464247	Os05g0455500	LOC_Os05g38150	37.71	1	25	25	68	716	77.6969	6.84424
115451171	Os03g0184000	LOC_Os03g08570	37.7	2	19	19	66	557	62.5693	7.89893
115452897	Os03g0337600	LOC_Os03g21900	37.69	2	12	12	60	390	42.8172	6.56592
115445243	Os02g0240300	LOC_Os02g14440	37.69	1	7	8	40	321	34.1537	5.64307
115473897	Os07g0662900	LOC_Os07g46790	37.63	1	34	34	119	946	108.226	6.40479
115450117	Os03g0102100	LOC_Os03g01222	37.62	1	11	11	19	303	34.3869	8.25049
115457440	Os04g0253000	LOC_Os04g18090	37.61	1	8	8	48	218	22.7727	10.5649
115472151	Os07g0490400	LOC_Os07g30800	37.6	1	10	10	28	258	27.9504	9.40771
297610965	Os10g0568900	LOC_Os10g41930	37.58	1	4	5	27	165	17.9987	5.57959
115442299	Os01g0953600	LOC_Os01g72430	37.56	1	7	7	28	197	21.3111	7.81104
115470389	Os07g0122400	LOC_Os07g03070	37.53	1	16	16	31	469	49.9268	4.48779
115476804	Os08g0465800	LOC_Os08g36320	37.52	2	13	18	58	501	56.6218	5.43994
297604477	Os05g0401200	LOC_Os05g33290	37.5	1	3	3	15	96	11.1646	5.09717
115470767	Os07g0168000	LOC_Os07g07310	37.47	1	28	28	111	902	97.3391	5.90967
115463773	Os05g0401100	LOC_Os05g33280	37.46	1	9	9	46	299	31.7496	8.45557
115453317	Os03g0387100	LOC_Os03g26970	37.45	1	1	8	23	235	25.8283	5.47803
115448547	Os02g0736400	LOC_Os02g50350	37.44	1	16	16	60	414	45.2799	6.72705
297720661	Os01g0895600	LOC_Os01g67054	37.43	1	6	10	23	179	21.8419	7.02002
115472339	Os07g0513000	---	37.43	11	15	15	210	358	39.682	8.32373
115445927	Os02g0439700	LOC_Os02g24330	37.41	1	17	17	29	441	47.5465	5.64307
115454489	Os03g0666200	LOC_Os03g46340	37.4	2	17	18	36	500	54.5267	5.32568
297727869	Os11g0103900	LOC_Os11g01300	37.38	2	3	3	12	107	10.6834	11.9272
115445587	Os02g0285800	LOC_Os02g18450	37.37	1	21	22	85	669	73.465	7.38623
115482830	Os10g0505700	---	37.36	1	4	4	16	91	9.27555	8.90967
11466807	psbE	---	37.35	1	4	4	99	83	9.43871	4.77979
115477683	Os08g0548900	LOC_Os08g43540	37.35	1	3	10	35	249	27.2791	7.43018
115456309	Os03g0825400	LOC_Os03g61019	37.35	1	2	3	7	83	9.8756	5.47803
115446723	Os02g0557700	LOC_Os02g35170	37.33	1	8	9	17	225	23.4232	9.14404
115470989	Os07g0191200	LOC_Os07g09340	37.3	1	15	32	132	957	105.374	6.78564
115449167	Os02g0792800	LOC_Os02g54980	37.29	1	18	18	77	539	59.9736	9.05615
115460748	Os04g0630400	LOC_Os04g53810	37.28	1	10	10	30	346	37.5568	5.10986
297600777	Os03g0295500	LOC_Os03g18420	37.27	1	7	7	21	110	12.3929	7.57666
115462185	Os05g0155500	LOC_Os05g06350	37.27	1	13	18	51	534	58.5299	5.31299
115461617	Os05g0105100	LOC_Os05g01480	37.27	3	2	8	16	220	23.9873	6.56592
115477781	Os08g0557600	LOC_Os08g44340	37.24	1	9	17	73	435	46.656	5.46533
115465273	Os05g0549700	LOC_Os05g47640	37.24	1	12	18	58	521	57.18	7.1958
115461559	Os05g0101400	LOC_Os05g01110	37.23	1	11	11	34	137	14.9192	10.6821
115454339	Os03g0646800	LOC_Os03g44484	37.23	1	13	13	28	368	41.3467	9.02686
115480629	Os09g0558000	LOC_Os09g38550	37.22	1	10	10	15	352	38.5548	5.42725
115471959	Os07g0461900	LOC_Os07g27780	37.2	1	7	10	27	328	35.011	7.86963
115452675	Os03g0315800	LOC_Os03g20100	37.18	1	14	14	112	390	41.8991	4.65283
115471095	Os07g0205000	LOC_Os07g10500	37.14	1	5	6	14	175	20.1886	10.4331
115479097	Os09g0408600	LOC_Os09g24320	37.13	1	14	15	46	501	52.2577	9.45166
115445041	Os02g0217600	LOC_Os02g12580	37.13	1	2	9	29	307	35.1221	5.08447
115468800	Os06g0600100	LOC_Os06g39870	37.12	3	1	16	61	423	46.7915	8.98291
115457638	Os04g0306400	---	37.09	1	8	8	26	275	28.6129	5.68115
11466851	ndhI	---	37.08	1	6	6	26	178	20.9013	6.85889
115470293	Os07g0112700	LOC_Os07g02200	37.08	1	5	5	13	178	19.1984	8.5874
115465471	Os05g0565000	LOC_Os05g49030	37.08	2	2	8	55	178	21.4453	10.4917
115454841	Os03g0704100	LOC_Os03g49720	37.02	1	10	10	32	262	29.2234	9.37842
115460410	Os04g0607000	LOC_Os04g51792	36.99	1	7	7	20	219	23.7276	9.33447
115483955	Os11g0128800	LOC_Os11g03470/LOC_Os12g03190	36.98	1	3	11	30	384	40.662	5.97314
115467032	Os06g0210500	LOC_Os06g10810	36.96	2	2	14	65	368	38.72	9.17334
115445157	Os02g0229000	LOC_Os02g13530	36.96	2	4	6	21	138	15.7388	10.5649
115459018	Os04g0481300	LOC_Os04g40530	36.94	1	9	9	13	268	29.9135	9.45166
115452287	Os03g0281600	LOC_Os03g17310	36.92	1	29	29	74	845	91.1578	5.14795
115473673	Os07g0642300	LOC_Os03g28400/LOC_Os07g44790	36.9	1	7	7	12	187	20.9123	4.51318
115483552	Os10g0569200	LOC_Os10g41960	36.86	1	27	27	74	719	83.1294	5.07178
115471689	Os07g0409700	LOC_Os07g22700	36.84	1	18	18	40	475	53.4622	8.57275
115477697	Os08g0550100	LOC_Os08g43640	36.83	1	6	17	44	486	55.1628	8.42627
115456011	Os03g0803000	LOC_Os03g58840	36.82	3	2	10	19	220	24.7239	8.74854
115448531	Os02g0735200	LOC_Os02g50240	36.8	1	9	10	68	356	39.1764	5.73193
115450841	Os03g0158300	LOC_Os03g06230	36.77	1	12	12	73	359	38.1112	7.69385
297600424	Os03g0182700	LOC_Os03g08450	36.73	1	8	8	15	226	25.8154	5.16064
115485941	Os11g0568500	LOC_Os11g36050	36.73	1	5	6	9	147	16.4154	6.21436
115451827	Os03g0241200	LOC_Os03g13800	36.72	2	4	4	8	128	13.9234	7.12256
115449197	Os02g0794600	LOC_Os02g55134	36.71	1	2	3	8	79	8.40103	7.6499
115465847	Os05g0597100	LOC_Os05g51830	36.7	1	13	13	36	297	32.5274	4.67822
115455955	Os03g0799600	LOC_Os03g58530	36.7	1	5	6	12	218	25.0313	8.35303
297608999	Os08g0559000	LOC_Os08g44470	36.59	1	3	4	14	123	12.7408	9.74463
115456445	Os03g0836200	LOC_Os03g61990	36.59	1	8	8	28	205	21.8101	8.11865
115454997	Os03g0720300	LOC_Os03g51080	36.59	2	10	16	67	492	55.0309	5.79541
297601622	Os03g0730000	LOC_Os03g52010	36.56	1	13	13	24	465	49.9986	6.55127
115484125	Os11g0143500	LOC_Os11g04740	36.52	2	21	21	44	597	67.0526	8.01611
115474697	Os08g0135900	LOC_Os08g04180	36.52	2	18	18	52	471	49.9684	6.771
115473539	Os07g0632700	LOC_Os07g43890	36.52	1	8	8	21	230	25.8372	7.92822
115445581	Os02g0284600	LOC_Os02g18380	36.5	1	2	5	14	137	15.5687	10.4917
115444801	Os02g0194700	LOC_Os02g10120	36.5	1	26	28	90	926	103.52	6.0874
115459602	Os04g0531900	---	36.48	2	8	13	26	307	33.3522	5.46533
115463863	Os05g0410200	LOC_Os05g33940	36.46	1	11	11	24	362	39.102	5.71924
297606837	Os07g0186400	LOC_Os07g08880	36.44	1	7	8	35	247	28.0607	8.57275
297604659	Os05g0477900	LOC_Os05g40010	36.43	1	5	5	19	129	12.6596	9.37842
297605871	Os06g0499000	---	36.41	1	9	9	16	206	24.0752	5.10986
115461883	Os05g0129000	LOC_Os05g03820/LOC_Os07g27790	36.38	3	16	16	50	492	55.6873	6.48096
115464525	Os05g0481600	LOC_Os05g40300	36.36	1	2	2	8	66	7.49171	8.98291
115452177	Os03g0271200	LOC_Os03g16440	36.35	2	25	25	75	817	87.6322	8.29443
115461557	Os05g0101200	LOC_Os05g01090	36.33	1	16	18	55	501	53.8037	6.48096
115444001	Os02g0129900	LOC_Os02g03720	36.33	1	11	11	28	300	32.3456	6.02393
115455323	Os03g0747800	LOC_Os03g53650	36.31	2	6	11	88	325	34.285	5.41455
115467818	Os06g0319700	LOC_Os06g21480	36.29	3	6	6	22	124	14.2247	9.93506
115457626	Os04g0303900	LOC_Os04g23820	36.29	1	8	8	35	259	27.5438	6.13818
115460690	Os04g0626400	LOC_Os04g53490	36.26	1	9	9	61	342	37.4215	6.66846
115444825	Os02g0196300	LOC_Os02g10260	36.26	1	17	17	37	513	55.8364	8.03076
115489354	Os12g0589100	LOC_Os12g39860	36.25	2	6	6	20	240	25.3825	9.11475
115458044	Os04g0386600	LOC_Os04g31700	36.25	1	12	12	60	389	41.2935	5.84619
115479025	Os09g0397700	LOC_Os09g23370	36.24	1	4	4	12	149	15.8716	8.32373
115437620	Os01g0559100	LOC_Os01g37837	36.24	1	2	16	41	425	48.3346	6.48096
297608272	Os08g0250200	---	36.23	1	2	2	6	69	7.66583	8.93896
115451471	Os03g0209600	LOC_Os03g11120	36.21	1	21	21	55	602	66.6957	6.66846
115482172	Os10g0437700	LOC_Os10g30156/LOC_Os10g30162	36.2	1	5	5	13	163	18.0017	10.1548
297596270	Os01g0195500	LOC_Os01g09890	36.18	1	6	6	19	199	21.277	6.7124
115470957	Os07g0187700	LOC_Os07g09000	36.18	1	11	11	21	387	42.9206	6.62451
11466771	psbC	---	36.15	1	15	15	465	473	52.0428	7.21045
115481766	Os10g0377400	LOC_Os10g23100	36.11	4	6	8	20	216	23.7973	7.95752
115462737	Os05g0227700	LOC_Os05g13950	36.11	1	16	18	39	529	61.2896	6.65381
115465213	Os05g0543700	LOC_Os05g46620	36.09	1	12	12	20	338	37.8793	6.58057
115467470	Os06g0264300	LOC_Os06g15360	36.08	1	10	11	53	413	43.0499	4.76709
115480904	Os10g0113900	LOC_Os10g02480	36.06	2	10	11	23	330	36.9925	6.72705
115445723	Os02g0307000	LOC_Os02g20410	36.04	1	41	42	90	1082	121.835	6.81494
297607244	Os07g0491900	LOC_Os07g30960	36.03	2	15	15	30	458	48.6783	9.5249
115483480	Os10g0564300	LOC_Os10g41470	36.03	1	2	5	14	136	15.4617	10.5503
115449135	Os02g0788400	LOC_Os02g54700	35.99	2	11	11	33	289	31.9893	8.49951
115470583	Os07g0147900	LOC_Os07g05400	35.98	1	9	15	52	378	41.788	8.70459
115454707	Os03g0691400	LOC_Os03g48480	35.98	1	7	7	14	164	17.4231	8.92432
115439315	Os01g0691700	LOC_Os01g49690	35.97	1	10	10	18	303	34.683	5.2876
115442301	Os01g0954000	LOC_Os01g72460	35.96	1	7	7	13	203	21.9021	6.39209
115478158	Os09g0249700	LOC_Os09g07510	35.95	1	17	17	56	587	65.6581	5.03369
115459206	Os04g0497000	---	35.94	2	8	10	35	345	37.537	6.72705
115448119	Os02g0700400	LOC_Os02g47200	35.94	2	10	11	25	345	37.8624	8.25049
115457078	Os04g0167800	LOC_Os04g08550	35.91	1	10	10	20	337	35.7428	6.58057
115466590	Os06g0163200	LOC_Os06g06770	35.9	1	14	14	32	376	41.4644	7.02002
115474715	Os08g0137200	LOC_Os08g04280	35.89	1	15	15	35	443	48.4634	5.2876
115447271	Os02g0612800	LOC_Os02g39920	35.89	1	29	29	61	755	81.3086	6.12549
115447819	Os02g0669100	LOC_Os02g44870	35.86	1	14	14	33	290	30.9036	6.03662
115483248	Os10g0546600	LOC_Os10g39930	35.83	1	18	18	35	561	62.0995	6.88818
115469010	Os06g0623300	LOC_Os06g41810	35.83	1	13	13	29	321	35.2219	5.98584
297605324	Os06g0185900	LOC_Os06g08670	35.82	1	2	2	26	67	7.40895	9.08545
115441299	Os01g0869800	LOC_Os01g64960	35.82	1	9	11	220	268	27.886	6.87354
297724785	Os06g0319800	---	35.81	1	6	6	23	215	23.3622	10.0376
297598895	Os02g0236600	---	35.81	1	4	4	15	148	15.4237	4.93213
115480305	Os09g0530000	LOC_Os09g36040	35.81	1	6	6	27	229	25.4602	8.70459
115440119	Os01g0764000	LOC_Os01g55830	35.81	2	7	9	30	215	23.9612	6.12549
115481492	Os10g0320400	LOC_Os10g17280	35.8	1	13	13	58	324	35.2383	9.02686
115472437	Os07g0523300	---	35.79	4	6	6	26	95	11.0039	10.1694
115471993	Os07g0468100	LOC_Os07g28480	35.78	1	9	11	26	232	25.81	5.12256
115464069	Os05g0432700	LOC_Os05g35740	35.78	1	5	5	22	109	11.7359	5.36377
115485265	Os11g0425600	---	35.71	1	2	2	5	70	7.59698	10.5796
115459340	Os04g0508300	LOC_Os04g42930	35.71	1	4	4	17	112	11.7671	6.03662
115435664	Os01g0249300	LOC_Os01g14690	35.71	2	3	5	8	126	13.7277	5.33838
115465391	Os05g0558400	LOC_Os05g48450	35.7	2	11	14	32	409	44.1838	7.18115
115466838	Os06g0187900	LOC_Os06g08840	35.68	1	2	8	32	185	21.1706	11.2827
115480417	Os09g0539100	LOC_Os09g36800	35.67	1	17	17	67	443	47.0654	7.89893
115444859	Os02g0198600	LOC_Os02g10510	35.66	2	12	12	30	415	45.6184	5.14795
115485785	Os11g0539800	---	35.65	1	14	14	38	460	51.0224	6.1001
115474059	Os07g0677200	LOC_Os07g48020	35.65	1	5	6	32	317	32.8691	6.18896
115462585	Os05g0204900	LOC_Os05g11550	35.61	1	17	17	39	483	54.4145	6.02393
115447763	Os02g0664300	LOC_Os02g44520	35.61	1	42	43	131	1359	148.54	6.58057
115464537	Os05g0482700	LOC_Os05g40420	35.6	1	8	23	104	559	60.7748	5.47803
115452901	Os03g0337800	LOC_Os03g21940	35.58	1	4	7	66	208	24.1264	11.3853
115469830	Os06g0705100	LOC_Os06g49160	35.56	1	7	7	51	239	24.8268	8.55811
115453239	Os03g0376100	LOC_Os03g25940	35.56	3	12	12	33	360	39.9841	6.7124
297612971	Os12g0263200	---	35.55	1	4	7	15	211	23.2683	8.82178
115478034	Os09g0127800	LOC_Os09g04110	35.55	1	8	42	103	1218	136.478	6.88818
297725503	Os07g0243150	LOC_Os07g13969	35.54	1	4	4	16	121	12.1904	9.56885
297605040	Os06g0109000	LOC_Os06g01950	35.54	1	10	10	22	363	41.4169	9.43701
115445929	Os02g0440000	LOC_Os02g24354	35.51	2	14	15	58	490	53.1812	6.84424
115443911	Os02g0123500	LOC_Os02g03100	35.47	1	12	12	37	375	41.7764	8.04541
115475858	Os08g0320100	LOC_Os08g23120	35.43	1	13	13	33	350	36.716	9.23193
115479507	Os09g0453800	LOC_Os09g28050	35.41	1	12	12	41	466	50.6179	7.13721
115439441	Os01g0703400	LOC_Os01g50760	35.41	2	10	11	37	353	40.6505	5.2749
115480339	Os09g0532700	LOC_Os09g36240	35.4	2	21	21	56	695	76.756	6.66846
115452473	Os03g0297400	LOC_Os03g18590	35.4	1	11	11	34	387	40.431	7.59131
115441357	Os01g0874700	LOC_Os01g65380	35.4	1	13	21	67	613	66.4168	4.66553
115474857	Os08g0156700	LOC_Os08g06020	35.39	1	7	8	17	243	26.8429	7.81104
115481278	Os10g0170200	LOC_Os10g08930	35.38	1	1	6	36	130	14.1997	9.62744
115435734	Os01g0256400	LOC_Os01g15260/LOC_Os06g29690	35.38	1	4	4	8	130	14.159	8.14795
115456287	Os03g0823700	LOC_Os03g60870	35.35	3	2	8	20	215	23.7892	6.55127
115471741	Os07g0418000	LOC_Os07g23520	35.32	1	9	9	29	269	30.5217	4.88135
115437756	Os01g0570700	LOC_Os01g38970	35.28	1	10	11	38	326	34.9143	7.78174
115434288	Os01g0127300	LOC_Os01g03650	35.27	1	14	14	44	482	51.5822	6.85889
297598134	Os01g0901900	LOC_Os01g67570	35.26	1	16	16	35	468	54.9667	5.5415
115461717	Os05g0113900	LOC_Os05g02300	35.26	2	1	6	46	156	16.4905	10.5942
115482036	Os10g0418000	LOC_Os10g28230	35.25	2	2	6	41	139	14.6032	10.3892
115465593	Os05g0575300	LOC_Os05g49970	35.24	1	16	16	56	559	59.5561	5.09717
115459800	Os04g0551800	LOC_Os04g46620	35.23	1	18	18	42	545	59.1952	6.21436
115442265	Os01g0951200	LOC_Os01g72240	35.22	1	14	16	39	477	50.7719	7.21045
297611263	Os11g0153800	LOC_Os11g05562	35.19	1	1	5	20	108	11.9116	10.4185
115441251	Os01g0866300	LOC_Os01g64650	35.19	2	9	9	27	216	23.5979	8.26514
115441039	Os01g0847700	LOC_Os01g62870	35.19	2	10	14	37	324	35.8915	7.28369
115456505	Os03g0841700	LOC_Os03g62490	35.17	1	5	9	32	290	32.1702	9.64209
115467636	Os06g0289900	LOC_Os06g18670	35.14	1	13	13	43	481	51.4507	6.25244
115462083	Os05g0147400	LOC_Os05g05470	35.14	1	21	21	57	535	59.1959	6.68311
115468212	Os06g0499900	LOC_Os06g30460	35.12	1	17	17	44	484	52.3515	6.96143
115446893	Os02g0578400	LOC_Os02g36850	35.11	1	7	7	23	225	24.4475	9.77393
115444003	Os02g0130000	LOC_Os02g03730	35.11	1	5	5	18	131	13.7122	10.3745
115466020	Os06g0115100	LOC_Os06g02460	35.06	1	2	3	10	77	8.39725	9.24658
115474811	Os08g0151800	LOC_Os08g05570	35.03	1	15	16	47	491	52.726	7.28369
115478581	Os09g0326800	LOC_Os09g15750	35.02	1	14	28	73	891	97.4091	5.2749
115464905	Os05g0517500	LOC_Os05g44130	35.01	1	10	10	27	337	36.907	8.35303
115488204	Os12g0287200	LOC_Os12g18880	35	2	5	5	11	160	18.4183	6.20166
115461306	Os04g0676100	LOC_Os04g57930	35	1	6	6	19	180	19.1091	8.27979
115456826	Os04g0106300	LOC_Os04g01590	35	1	10	10	21	340	36.9211	6.31592
115441855	Os01g0918300	LOC_Os01g68950	35	2	4	4	15	100	10.9213	5.09717
115471679	Os07g0408700	LOC_Os07g22600	34.98	1	8	8	32	323	35.1236	5.40186
115455639	Os03g0774200	LOC_Os03g56300	34.98	1	8	8	18	223	25.5226	5.41455
115464325	Os05g0461400	LOC_Os05g38640	34.97	2	2	7	61	163	16.9606	10.6821
115453747	Os03g0452300	LOC_Os03g34040	34.97	1	14	14	92	326	34.8636	5.03369
297600878	Os03g0339100	LOC_Os03g21990	34.96	1	15	15	27	472	52.0665	8.86572
115456699	Os03g0856500	LOC_Os03g63950	34.95	1	12	12	61	309	34.1348	8.38232
115435558	Os01g0238500	LOC_Os01g13690	34.94	2	9	9	69	332	35.7341	6.03662
115467402	Os06g0253100	LOC_Os06g14240	34.93	1	5	5	9	146	16.0135	8.55811
115451155	Os03g0183100	LOC_Os03g08480	34.93	1	15	15	37	375	41.7392	6.97607
115450044	Os02g0831800	---	34.92	1	9	9	21	378	37.789	7.25439
115485379	Os11g0448700	LOC_Os11g26190	34.91	1	4	4	13	106	11.3107	7.76709
115445585	Os02g0285300	LOC_Os02g18410	34.91	1	11	11	18	232	24.0335	4.7417
297728925	Os12g0188700	LOC_Os12g08730	34.88	1	7	7	203	172	18.5174	7.92822
297725131	Os06g0645400	LOC_Os06g43760	34.88	1	10	11	32	387	43.6353	5.64307
115471983	Os07g0467200	LOC_Os07g28400	34.86	1	3	3	32	109	11.398	9.61279
115456051	Os03g0805200	LOC_Os03g59050	34.85	2	6	20	53	637	67.6237	7.88428
115435844	Os01g0266600	---	34.85	1	6	6	23	198	20.8607	7.98682
115451465	Os03g0209000	LOC_Os03g11060	34.84	1	3	3	6	155	15.6088	4.51318
297608617	Os08g0428800	---	34.83	1	9	9	79	178	18.66	10.4624
115436242	Os01g0316600	LOC_Os01g21420	34.83	1	4	7	18	178	20.3738	8.76318
115463009	Os05g0292800	LOC_Os05g22730	34.82	1	4	4	10	112	12.1018	10.4331
115450068	Os02g0833400	LOC_Os02g58650	34.82	1	12	12	39	336	36.908	6.63916
115487706	Os12g0190200	LOC_Os12g08830	34.8	1	8	8	40	273	29.528	6.23975
115481490	Os10g0320100	LOC_Os10g17260	34.79	1	16	16	32	526	57.4809	8.04541
297723707	Os05g0147500	LOC_Os05g05480	34.78	1	10	10	26	276	29.626	8.17725
115485469	Os11g0472000	LOC_Os11g28270	34.78	1	8	12	31	414	45.4918	8.63135
115464561	Os05g0486700	LOC_Os05g40820	34.78	1	1	8	25	161	18.3262	10.7847
115450897	Os03g0162200	LOC_Os03g06670	34.78	2	1	5	30	138	14.5471	10.3159
115478314	Os09g0277800	LOC_Os09g10600	34.77	1	8	12	65	371	38.9962	9.01221
115434810	Os01g0174300	LOC_Os01g07910	34.73	1	10	10	30	311	33.8307	8.80713
115445913	Os02g0436400	LOC_Os02g24020	34.69	1	11	13	36	343	37.3571	7.03467
297609789	Os09g0512800	LOC_Os09g33790	34.65	1	3	3	15	101	10.8801	4.7417
115447377	Os02g0622400	---	34.65	1	7	7	15	202	22.6874	6.53662
115435550	Os01g0237100	LOC_Os01g13570	34.65	1	12	12	33	303	33.2872	9.45166
115487114	Os12g0125400	LOC_Os11g03470/LOC_Os12g03190	34.64	1	2	10	32	384	40.8191	6.43018
297604409	Os05g0373700	LOC_Os05g31000	34.63	1	3	6	33	205	22.2639	4.48779
115469026	Os06g0625400	LOC_Os05g38680	34.63	1	28	28	103	846	94.2185	5.37646
115487148	Os12g0128600	---	34.62	2	3	3	4	78	8.65822	8.19189
115470295	Os07g0112800	LOC_Os07g02210	34.57	1	2	5	31	162	17.7547	5.75732
115488968	Os12g0548300	LOC_Os12g36194	34.55	1	10	10	50	220	23.4553	9.45166
115468402	Os06g0538900	LOC_Os06g34790	34.55	1	4	4	14	165	17.6111	5.52881
115447923	Os02g0680600	LOC_Os02g45660	34.55	1	7	7	24	275	29.2596	9.74463
115463073	Os05g0301700	LOC_Os05g23620	34.54	1	2	7	34	304	33.2728	6.62451
115442085	Os01g0935700	LOC_Os01g70960	34.54	1	2	7	30	304	33.2476	6.45557
115481216	Os10g0159600	LOC_Os10g07200	34.45	1	12	12	33	357	38.4522	9.979
115443927	Os02g0125100	LOC_Os02g03260	34.44	2	16	16	89	514	55.5047	7.32764
297611522	Os11g0236100	---	34.42	1	11	12	39	398	41.9143	7.26904
115470887	Os07g0181000	LOC_Os07g08340	34.4	2	19	19	44	561	62.3991	8.36768
115447069	Os02g0595500	LOC_Os02g38200	34.39	1	4	10	37	378	40.603	8.00146
115453455	Os03g0405100	LOC_Os03g29180	34.37	1	11	11	35	323	34.3817	8.98291
115448713	Os02g0751600	LOC_Os02g51570	34.35	1	6	6	40	230	23.4309	8.88037
297604125	Os05g0247100	LOC_Os05g15770	34.34	2	11	11	64	297	32.5285	6.53662
115445529	Os02g0276400	LOC_Os02g17640	34.32	1	6	6	12	236	25.8669	9.5542
115439775	Os01g0734800	LOC_Os01g53350	34.31	2	14	14	30	478	52.5509	5.52881
115487944	Os12g0235800	LOC_Os12g13320	34.3	1	18	18	60	481	52.1597	7.04932
115464503	Os05g0480000	LOC_Os05g40180	34.3	1	9	9	33	242	26.7992	9.72998
115470967	Os07g0188800	LOC_Os07g09060	34.27	1	16	16	61	534	57.2101	6.354
115456822	Os04g0105700	LOC_Os04g01540	34.26	1	9	9	33	251	28.719	5.87158
115448405	Os02g0725200	LOC_Os02g49326	34.26	1	13	13	26	502	56.3134	8.88037
297720435	Os01g0764500	---	34.25	1	1	2	5	73	8.10098	8.30908
115479579	Os09g0459800	LOC_Os09g28570	34.23	1	21	21	37	634	68.3917	8.86572
115457904	Os04g0363700	---	34.23	2	3	3	5	111	12.3744	8.90967
115487062	Os12g0120200	---	34.21	1	1	1	2	38	4.64932	4.88135
115486337	Os11g0629200	LOC_Os11g41130	34.21	2	8	11	19	304	35.3082	7.40088
115483568	Os10g0571200	LOC_Os10g42100	34.21	1	15	16	54	570	61.6064	6.44287
115479863	Os09g0487500	LOC_Os09g31260	34.19	1	3	3	9	117	12.6534	8.20654
115450329	Os03g0117100	LOC_Os03g02590	34.18	1	6	8	26	237	26.4084	9.96436
297599905	Os02g0741900	LOC_Os02g50830	34.15	1	6	6	13	205	22.2426	5.32568
115459616	Os04g0533000	LOC_Os04g45040	34.14	1	4	14	40	498	56.6753	8.68994
115434962	Os01g0185300	---	34.13	1	12	12	24	419	46.1363	5.92236
115468786	Os06g0597900	LOC_Os06g39690	34.12	1	11	11	33	381	42.9676	8.29443
115481176	Os10g0151800	LOC_Os10g06130	34.11	1	12	14	32	472	51.4041	5.17334
297727875	Os11g0105750	---	34.1	1	26	31	72	918	102.947	7.31299
115438250	Os01g0600900	LOC_Os01g41710	34.1	1	1	6	587	261	27.535	5.42725
297597036	Os01g0565600	LOC_Os01g38480	34.09	1	5	5	11	176	19.6733	5.021
297598740	Os02g0190600	LOC_Os02g09750	34.08	1	8	8	16	267	30.0845	6.7124
115452835	Os03g0332700	LOC_Os03g21490	34.08	1	9	9	50	311	33.3344	6.16357
115486133	Os11g0595200	LOC_Os11g38260	34.07	2	7	7	36	270	28.3569	8.79248
115474931	Os08g0162800	LOC_Os08g06550	34.07	2	2	3	17	91	10.1371	5.22412
115435560	Os01g0238600	LOC_Os01g13700	34.04	1	4	4	8	141	15.1721	9.11475
115469912	Os06g0712200	LOC_Os06g49780	34.02	1	7	7	16	241	25.8301	5.04639
115434860	Os01g0178000	LOC_Os01g08270	34.01	1	11	11	28	394	43.7192	5.77002
297609126	Os09g0261300	LOC_Os09g08660	33.99	1	8	9	30	303	33.4939	5.12256
115435842	Os01g0266500	LOC_Os01g16146	33.98	1	7	7	10	309	32.8867	5.03369
115472353	Os07g0515100	LOC_Os07g33110	33.96	1	16	16	32	533	59.4678	6.32861
297608302	Os08g0266300	LOC_Os08g16570	33.92	1	8	8	33	339	35.6016	7.28369
115477978	Os09g0115500	LOC_Os09g02710/LOC_Os09g02729	33.92	1	7	7	18	227	24.1527	9.23193
115473431	Os07g0622200	LOC_Os07g42960	33.89	1	9	16	36	537	59.0409	8.23584
115443737	Os02g0110200	LOC_Os02g02000	33.88	1	15	15	51	487	53.6768	5.85889
115436144	Os01g0303000	LOC_Os01g19740	33.87	1	5	5	50	124	12.8251	4.70361
115474653	Os08g0130500	LOC_Os08g03640	33.86	3	10	10	89	319	34.3561	5.49072
115447675	Os02g0655300	LOC_Os02g43830	33.85	1	7	7	19	257	26.4545	7.69385
115487692	Os12g0189300	LOC_Os12g08760	33.84	1	10	10	47	328	34.6944	6.53662
115476300	Os08g0398700	LOC_Os08g30810	33.83	2	26	30	87	875	97.842	5.38916
297726059	Os08g0162000	LOC_Os08g06470	33.82	1	1	2	4	68	7.39871	8.00146
115446391	Os02g0520800	LOC_Os02g32120	33.82	1	7	9	29	272	29.8014	8.42627
115489130	Os12g0566300	LOC_Os12g37870	33.81	3	11	11	29	423	46.765	5.57959
115459224	Os04g0498200	---	33.77	1	3	3	4	77	9.0323	7.21045
115452867	Os03g0335300	LOC_Os03g21720	33.76	2	16	19	39	628	69.9365	5.65576
115443677	Os02g0105200	LOC_Os02g01500	33.76	1	9	16	50	548	58.9613	8.01611
115439253	Os01g0686400	LOC_Os01g49250	33.75	1	2	2	3	80	8.84836	5.08447
115466518	Os06g0157000	LOC_Os06g06290	33.72	1	9	10	42	341	36.4595	7.94287
115436084	Os01g0294700	LOC_Os01g19020	33.72	4	11	11	24	347	37.8893	6.93213
115457782	Os04g0337500	LOC_Os04g26870	33.71	2	9	13	28	350	38.0944	6.97607
115440665	Os01g0814900	LOC_Os01g59930	33.69	1	8	9	29	279	31.004	8.70459
115468008	Os06g0360300	---	33.68	2	8	10	30	291	31.0884	9.27588
115435678	Os01g0250900	LOC_Os01g14810	33.68	1	18	18	45	579	65.7223	5.80811
115473585	Os07g0636000	LOC_Os07g44190	33.67	2	10	20	45	600	65.8257	9.11475
115488462	Os12g0448900	---	33.66	1	20	20	39	618	70.3969	7.00537
115451785	Os03g0237100	LOC_Os03g13390	33.65	1	7	9	11	318	35.3989	7.38623
115471021	Os07g0194000	LOC_Os07g09600	33.64	3	1	9	19	220	24.7619	8.88037
115465912	Os06g0105400	LOC_Os06g01630	33.64	1	12	17	56	550	59.7324	6.80029
115462253	Os05g0161500	LOC_Os05g06920	33.63	2	15	16	42	559	60.2361	5.71924
115463617	Os05g0382900	LOC_Os05g31760	33.6	1	12	12	31	372	40.2374	5.94775
115457166	Os04g0182800	LOC_Os04g10400	33.6	1	7	7	18	253	27.4518	6.62451
297605230	Os06g0163600	---	33.57	1	4	4	18	143	16.1661	6.62451
115436646	Os01g0376700	LOC_Os01g27880	33.57	2	9	14	54	423	47.0077	6.17627
115471073	Os07g0202100	LOC_Os07g10250	33.54	2	4	20	53	638	67.1305	8.22119
115445213	Os02g0235600	LOC_Os02g14059	33.52	1	1	6	37	182	20.8229	9.92041
115436904	Os01g0510100	LOC_Os01g32660	33.52	1	12	12	30	355	39.9746	5.8208
115435162	Os01g0205500	---	33.52	2	1	6	39	182	20.8069	9.92041
115446097	Os02g0469600	LOC_Os02g27030	33.51	1	11	11	36	373	40.5659	6.46826
297604927	Os05g0566500	LOC_Os05g49150	33.5	1	18	18	48	585	65.0404	5.47803
297599961	Os02g0765900	---	33.49	1	2	13	46	424	46.6982	7.04932
115452411	Os03g0292800	LOC_Os03g18180	33.49	1	4	8	26	209	23.4145	4.79248
115465831	Os05g0595400	LOC_Os05g51700	33.47	1	9	9	49	239	25.9214	8.74854
115470923	Os07g0184800	LOC_Os07g08710	33.45	1	9	9	14	278	28.5132	10.521
115438000	Os01g0588200	LOC_Os01g40570	33.45	1	7	7	24	275	29.8734	7.76709
115448739	Os02g0753800	LOC_Os02g51750	33.44	1	10	11	21	314	35.5326	7.25439
297604990	Os05g0586900	LOC_Os05g50950	33.33	1	5	5	6	165	19.2495	6.41748
297603762	Os05g0129100	LOC_Os05g03830	33.33	1	3	6	15	180	18.7151	5.97314
115486523	Os11g0660500	LOC_Os11g43900	33.33	1	7	7	45	168	18.9345	4.67822
115482778	Os10g0500700	LOC_Os10g35720	33.33	1	9	9	20	384	41.418	5.04639
115477445	Os08g0529100	LOC_Os08g41730	33.33	1	3	7	13	219	23.8019	6.20166
115475369	Os08g0225000	LOC_Os08g12840	33.33	1	3	4	11	150	16.3556	9.40771
115475275	Os08g0205400	---	33.33	1	2	2	12	81	8.49434	6.59521
115456145	Os03g0811600	LOC_Os03g59700	33.33	1	7	7	16	204	21.7757	8.17725
115454217	Os03g0628900	---	33.33	1	4	4	5	126	14.6603	4.66553
115448701	Os02g0750100	LOC_Os02g51470	33.33	1	6	6	81	243	26.2016	5.05908
115437194	Os01g0528800	LOC_Os01g34480	33.33	1	10	10	31	336	36.869	6.72705
115436366	Os01g0337900	LOC_Os01g23610	33.33	2	18	18	62	561	58.8088	6.99072
115455063	Os03g0726100	LOC_Os03g51600	33.26	1	5	12	34	451	49.7873	5.021
115441871	Os01g0919900	LOC_Os01g69080	33.25	2	10	14	36	400	45.292	7.06396
297725961	Os07g0689300	LOC_Os07g48960	33.2	1	19	26	59	976	106.741	5.46533
115452297	Os03g0282900	LOC_Os03g17450	33.19	1	8	8	15	238	26.1695	9.39307
115475287	Os08g0206600	LOC_Os08g10570	33.17	1	20	20	77	600	64.6107	7.10791
115484735	Os11g0216900	LOC_Os11g11050	33.16	1	12	12	33	374	39.4835	5.35107
115467370	Os06g0247500	LOC_Os06g13810	33.16	1	18	18	48	567	61.223	6.41748
115459446	Os04g0518000	LOC_Os04g43750	33.14	1	8	10	25	344	37.5167	5.18604
115472953	Os07g0574800	LOC_Os07g38730	33.11	1	4	13	45	450	49.6225	5.05908
115462437	Os05g0182100	LOC_Os05g08930	33.08	1	12	12	19	396	44.6917	4.90674
115439877	Os01g0743400	LOC_Os01g54020	33.08	1	10	10	31	393	43.3076	8.63135
297607281	Os07g0507000	LOC_Os07g32380	33.06	1	4	4	8	121	13.4688	5.5415
297598707	Os02g0184200	LOC_Os02g09150	33.06	1	1	10	53	360	37.0484	6.55127
115473251	Os07g0604800	LOC_Os07g41360	33.06	1	5	12	37	366	41.2527	6.43018
115488924	Os12g0540700	LOC_Os12g35550	33.04	1	2	2	3	115	12.8267	9.34912
297600841	Os03g0323200	LOC_Os03g20700/LOC_Os07g46310	33.03	1	19	34	130	1087	120.533	5.5415
115478180	Os09g0252100	LOC_Os09g07830	33.03	1	12	12	27	433	44.102	7.66455
115468996	Os06g0622300	LOC_Os06g41730	32.97	2	13	13	19	461	50.428	5.10986
115459948	Os04g0565400	LOC_Os04g47770	32.97	2	13	13	30	464	50.5326	6.40479
115458738	Os04g0457000	LOC_Os04g38410	32.94	1	11	11	109	252	27.043	7.40088
115449733	Os02g0820000	LOC_Os02g57450	32.94	1	7	12	22	343	38.9926	6.20166
115461044	Os04g0657300	LOC_Os04g56230	32.92	1	15	15	41	407	46.3525	5.60498
115466494	Os06g0154500	LOC_Os06g06090	32.91	2	9	11	22	398	44.8295	5.74463
115457984	Os04g0379700	LOC_Os04g31040	32.91	1	12	12	39	468	52.8723	6.20166
115439523	Os01g0710700	LOC_Os01g51360	32.9	1	12	12	40	465	50.4215	6.97607
297601775	Os03g0778100	LOC_Os03g56670	32.89	1	6	6	101	225	23.6095	9.46631
115473931	Os07g0665200	LOC_Os07g46990	32.89	1	1	5	33	152	15.0714	6.41748
115441075	Os01g0850900	LOC_Os01g63210	32.87	1	7	7	23	216	23.5311	6.0874
297724539	Os06g0178100	LOC_Os06g07932/LOC_Os06g08032	32.86	4	10	12	22	350	39.9085	5.30029
115489048	Os12g0559200	LOC_Os12g37260	32.86	3	27	28	83	922	104.621	6.27783
115441201	Os01g0862200	LOC_Os01g64270	32.8	1	6	6	23	186	20.0186	8.48486
115434256	Os01g0124000	LOC_Os01g03310/LOC_Os01g03320	32.8	1	4	4	32	186	20.0862	5.04639
115467040	Os06g0211300	---	32.79	2	5	5	15	122	13.256	9.30518
115489416	Os12g0597500	LOC_Os12g40550	32.78	1	13	13	21	418	45.2103	6.55127
115460280	Os04g0598000	LOC_Os04g50970	32.77	1	2	2	7	119	12.0333	9.40771
115460982	Os04g0650500	LOC_Os04g55690	32.76	1	9	9	11	293	31.3706	9.53955
115482514	Os10g0476600	LOC_Os10g33680	32.72	1	18	18	36	541	61.8657	4.93213
115465521	Os05g0568900	LOC_Os05g49380	32.72	1	14	14	42	437	45.5021	7.89893
115474425	Os08g0109200	LOC_Os08g01760	32.7	1	13	13	38	422	44.872	8.32373
115486501	Os11g0657100	LOC_Os11g43600	32.69	1	13	13	40	416	46.8649	6.354
115468044	Os06g0472200	LOC_Os06g27770	32.69	1	10	10	28	312	34.141	6.66846
115454377	Os03g0651000	LOC_Os03g44820	32.68	1	4	4	12	153	16.5997	6.82959
115469396	Os06g0664200	LOC_Os06g45370	32.67	1	11	11	45	401	43.2134	7.40088
115448293	Os02g0715400	LOC_Os02g48480	32.67	1	3	3	12	101	10.4201	4.55127
115444047	Os02g0133300	LOC_Os02g04040	32.67	2	39	39	79	1154	132.849	7.12256
297598550	Os02g0137400	LOC_Os02g04480	32.66	1	23	23	52	845	94.2224	5.2876
115467482	Os06g0265000	LOC_Os06g15420	32.66	1	15	16	41	591	66.1852	6.45557
297722589	Os03g0781000	LOC_Os03g56840	32.65	1	2	2	6	98	10.5174	7.21045
115477851	Os08g0562600	LOC_Os08g44850	32.65	1	8	8	23	291	30.326	4.98291
115451975	Os03g0254800	LOC_Os03g14990	32.65	1	16	16	37	438	46.8947	7.97217
115457070	Os04g0165700	LOC_Os04g08350	32.63	1	12	13	55	377	40.128	8.41162
115439015	Os01g0663500	LOC_Os01g47420	32.63	1	4	4	4	190	21.274	8.80713
115474735	Os08g0139000	LOC_Os08g04440	32.62	1	5	5	11	141	15.2547	9.81787
115440607	Os01g0810300	LOC_Os01g59530	32.62	1	6	8	47	187	20.9642	4.83057
297610712	Os10g0493600	LOC_Os10g35110	32.61	1	12	13	46	417	45.7923	7.94287
297596364	Os01g0225400	LOC_Os01g12560	32.61	1	4	4	7	138	14.4472	6.25244
115464757	Os05g0503300	LOC_Os05g42350	32.61	1	19	20	104	641	70.5292	8.48486
115460334	Os04g0601800	LOC_Os04g51280	32.61	2	1	3	7	92	10.8814	5.60498
115436226	Os01g0314300	LOC_Os01g21180	32.6	1	6	6	14	181	20.3326	7.97217
115481922	Os10g0403700	LOC_Os10g26400	32.59	1	10	10	31	402	43.3394	7.79639
115472813	Os07g0564700	LOC_Os07g37750	32.58	1	7	7	11	264	29.35	5.84619
115439969	Os01g0752300	LOC_Os01g54870	32.58	1	1	7	47	178	21.3864	10.4478
115456219	Os03g0819100	LOC_Os03g60460	32.57	1	19	19	40	611	67.7488	5.13525
115459798	Os04g0551700	LOC_Os04g46610	32.56	1	7	7	20	215	23.7324	8.79248
115445459	Os02g0267000	LOC_Os02g16709	32.55	1	7	7	13	298	32.1694	6.26514
115440827	Os01g0830000	LOC_Os01g61400	32.54	1	17	17	50	544	59.8066	6.3667
297607557	Os07g0593400	---	32.53	1	3	3	8	166	16.2022	4.61475
115489108	Os12g0564400	LOC_Os12g37710	32.53	1	5	7	32	249	28.1834	8.99756
115470281	Os07g0111700	LOC_Os07g02100	32.53	5	13	14	21	458	51.0495	5.90967
115476498	Os08g0427900	LOC_Os08g33120	32.52	1	8	8	15	286	30.4725	11.0483
115468570	Os06g0564500	LOC_Os06g36840	32.49	3	8	10	28	357	38.4474	4.98291
115448437	Os02g0728100	LOC_Os02g49570	32.49	1	19	19	46	674	74.1569	9.02686
115467406	Os06g0254300	LOC_Os06g14324/LOC_Os06g14350	32.48	1	2	5	20	157	17.749	7.02002
115463191	Os05g0323900	LOC_Os05g25850	32.47	1	7	7	48	231	24.9819	7.02002
115447127	Os02g0600100	LOC_Os02g38810	32.47	2	5	12	27	388	44.1218	5.79541
115471001	Os07g0192300	LOC_Os07g09450	32.46	3	3	3	6	114	12.2796	10.1108
115489418	Os12g0597600	LOC_Os12g40560	32.43	1	9	10	28	367	38.5102	6.84424
115479475	Os09g0451500	LOC_Os09g27830	32.43	1	14	14	31	441	47.3043	5.57959
115469298	Os06g0655100	LOC_Os06g44460	32.43	1	15	17	41	629	66.158	6.17627
115457714	Os04g0320100	LOC_Os04g25400	32.42	1	8	8	24	327	35.8928	7.07861
115478070	Os09g0133200	LOC_Os09g04730	32.41	1	9	9	23	253	26.7834	8.80713
297723537	Os04g0661600	---	32.39	1	1	1	1	71	7.48684	5.23682
297722713	Os03g0854400	LOC_Os03g63740	32.39	1	4	4	8	176	17.8785	10.1401
115439967	Os01g0752200	LOC_Os01g54860	32.39	1	13	13	22	389	43.2688	5.23682
297722117	Os03g0356484	LOC_Os03g24060	32.37	2	3	5	10	173	19.0837	7.34229
297611526	Os11g0237700	LOC_Os11g13420	32.37	1	2	3	3	139	15.1967	9.83252
115440919	Os01g0837600	LOC_Os01g62060	32.35	1	4	4	4	102	11.0171	4.84326
115450080	Os02g0834700	LOC_Os02g58790	32.31	1	10	10	35	359	38.7882	9.15869
115446303	Os02g0510200	LOC_Os02g30630	32.3	1	17	17	46	644	69.3489	6.96143
115441819	Os01g0915800	LOC_Os01g68710	32.28	1	3	4	6	158	16.8149	9.56885
115436236	Os01g0315800	LOC_Os01g21320	32.24	2	4	14	33	425	46.4169	8.23584
115464793	Os05g0508500	LOC_Os05g43252	32.23	1	5	5	15	121	13.1687	5.08447
115473475	Os07g0626400	LOC_Os07g43330	32.22	1	9	9	25	270	31.1741	9.40771
115438550	Os01g0614500	LOC_Os01g42820	32.21	5	10	11	32	447	44.242	8.42627
297597515	Os01g0719700	LOC_Os01g52170	32.2	1	14	14	37	500	53.7166	5.70654
115474999	Os08g0171100	LOC_Os08g07440	32.2	1	1	1	1	59	6.27121	4.83057
115470561	Os07g0143700	LOC_Os07g05050	32.19	1	9	9	14	292	31.6845	9.74463
115449613	Os02g0816100	LOC_Os02g57100	32.17	1	7	7	16	258	28.2454	6.30322
115452247	Os03g0278200	LOC_Os03g17000	32.15	1	19	20	42	675	76.0176	6.94678
297608425	Os08g0335000	LOC_Os08g24760	32.14	1	2	2	4	84	9.61161	5.5415
115464801	Os05g0509200	LOC_Os05g43360	32.12	1	8	8	25	274	30.0358	7.37158
115465962	Os06g0110100	---	32.11	1	9	9	20	299	34.1366	5.10986
115486155	Os11g0599500	LOC_Os11g38670	32.1	1	10	16	36	623	65.9467	8.08936
297607452	Os07g0561500	LOC_Os07g37420	32.08	2	5	8	17	265	26.5786	7.41553
115479997	Os09g0503100	LOC_Os09g32640	32.08	1	11	11	26	346	35.9347	8.47021
115461104	Os04g0661900	LOC_Os04g56646	32.08	1	4	4	12	159	17.9106	7.10791
115443867	Os02g0120900	LOC_Os02g02850	32.08	1	12	12	27	371	39.334	9.02686
115487878	Os12g0225200	LOC_Os12g12370	32.07	1	10	10	36	343	37.5614	9.5249
115460026	Os04g0573200	LOC_Os04g48410	32.05	1	10	10	27	312	32.2095	6.1001
115455567	Os03g0766800	LOC_Os03g55776	32.05	1	2	2	4	78	8.04193	5.0083
115461240	Os04g0671700	LOC_Os04g57590	32.04	1	10	10	55	387	41.3025	5.5415
115472303	Os07g0509800	LOC_Os07g32570	32	1	14	14	50	475	50.56	8.14795
115435888	Os01g0270100	LOC_Os01g16430	32	2	9	9	29	250	27.2522	6.53662
115462181	Os05g0155300	LOC_Os05g06330	31.99	1	7	7	15	272	29.7158	5.5415
297720155	Os01g0587500	---	31.98	1	5	5	13	172	18.4524	8.52881
115433984	Os01g0102600	LOC_Os01g01302	31.97	1	9	9	43	269	29.5981	6.02393
297598312	Os01g0945800	LOC_Os01g71770	31.96	1	9	9	21	363	40.0484	7.10791
115438502	Os01g0612200	LOC_Os01g42650	31.95	1	7	7	49	169	18.0358	5.14795
297609495	Os09g0423600	LOC_Os09g25580	31.94	1	6	6	13	191	20.6155	6.53662
115472907	Os07g0571600	LOC_Os07g38390	31.94	1	8	8	20	263	28.5043	9.48096
115434794	Os01g0172800	---	31.94	1	6	6	13	191	20.6441	8.95361
115439655	Os01g0723400	LOC_Os01g52500	31.93	1	13	17	89	592	65.2398	8.39697
297599360	Os02g0533000	LOC_Os02g33010	31.91	1	4	4	9	94	11.358	8.41162
115461356	Os04g0679100	LOC_Os04g58240	31.89	1	9	9	32	301	32.5162	5.03369
297723905	Os05g0274700	LOC_Os03g40180/LOC_Os05g19370	31.86	1	8	8	18	204	24.3183	11.5317
115437030	Os01g0516600	LOC_Os01g33204	31.86	1	3	3	14	113	12.6194	5.21143
297599178	Os02g0462900	LOC_Os02g26440	31.82	1	2	2	6	66	7.59695	4.65283
115477853	Os08g0562700	LOC_Os08g44860	31.82	1	11	11	59	418	47.4278	6.06201
115470313	Os07g0115300	LOC_Os07g02440	31.82	1	10	10	17	330	34.7965	8.85107
115466344	Os06g0142700	LOC_Os06g05080	31.82	1	5	5	10	154	17.0754	5.70654
115436640	Os01g0375200	LOC_Os01g27750	31.82	2	15	16	46	572	61.59	8.01611
297605049	Os06g0112400	LOC_Os06g02240	31.8	1	8	8	38	261	27.746	6.7124
115442497	Os01g0970700	LOC_Os01g73910	31.8	1	11	11	26	327	36.0599	8.29443
115440741	Os01g0821800	LOC_Os01g60660	31.78	1	14	14	38	409	43.9287	8.04541
115449589	Os02g0815500	LOC_Os02g57040	31.76	2	11	11	76	381	40.7965	7.1665
115466360	Os06g0143900	LOC_Os06g05180	31.75	1	18	24	52	907	102.824	4.98291
115444521	Os02g0173500	LOC_Os02g07720	31.75	3	9	9	15	315	35.9785	5.03369
115439335	Os01g0693800	LOC_Os01g49890	31.75	1	9	15	64	548	59.8533	6.87354
11466764	psbA	---	31.73	1	10	10	359	353	38.9375	5.36377
115456912	Os04g0118100	LOC_Os04g02780	31.72	1	9	13	41	435	46.1506	5.80811
115440159	Os01g0767000	LOC_Os01g56140	31.71	1	34	34	69	987	113.545	5.30029
115474917	Os08g0162100	LOC_Os08g06480	31.69	1	21	30	64	1133	124.699	7.28369
115486839	Os11g0708500	LOC_Os11g48080	31.68	1	1	12	103	363	38.7596	6.53662
115473517	Os07g0630800	LOC_Os07g43700	31.68	1	9	12	51	404	42.1952	8.79248
115456395	Os03g0831900	LOC_Os03g61640	31.68	1	7	7	10	202	23.6411	9.21729
115456389	Os03g0831500	LOC_Os03g61600	31.66	1	11	11	31	398	41.7235	6.03662
297727113	Os09g0491820	LOC_Os09g31502	31.61	1	10	10	22	348	38.0936	7.32764
297600877	Os03g0337900	LOC_Os03g21950	31.58	1	2	2	16	57	6.66544	10.2427
297606777	Os07g0164300	LOC_Os07g07000	31.55	1	9	9	20	336	37.7349	8.98291
115483532	Os10g0567800	LOC_Os10g41820	31.55	1	13	19	39	618	69.3381	7.60596
115477903	Os08g0567200	LOC_Os08g45240	31.49	2	6	6	11	235	26.2383	9.77393
115468878	Os06g0608300	LOC_Os06g40600	31.49	1	28	30	67	997	110.428	5.31299
115467244	Os06g0231300	LOC_Os06g12530	31.49	1	10	10	19	308	34.2474	5.74463
115477226	Os08g0510800	LOC_Os08g39990	31.48	1	9	9	16	378	39.6698	10.3306
115481218	Os10g0159700	LOC_Os10g07210	31.47	1	6	6	15	197	21.0692	8.92432
297722339	Os03g0610650	---	31.44	1	6	9	25	264	29.1861	5.46533
115472141	Os07g0489800	LOC_Os07g30670	31.43	1	5	5	31	210	22.6143	7.54736
115474019	Os07g0673500	LOC_Os07g47630	31.42	2	4	9	43	296	33.1217	10.6382
115459732	Os04g0545200	LOC_Os04g46100	31.41	1	15	15	32	519	57.769	5.90967
115454407	Os03g0655400	LOC_Os03g45280	31.4	1	3	3	56	86	9.64875	7.21045
297597655	Os01g0763300	LOC_Os01g55770	31.39	1	3	3	19	137	15.4348	9.31982
115448299	Os02g0717100	LOC_Os02g48590	31.39	1	6	6	11	223	23.4603	9.39307
115474483	Os08g0113200	LOC_Os08g02130	31.38	1	27	27	51	838	94.9576	5.64307
115488186	Os12g0283800	LOC_Os12g18630	31.36	1	6	7	17	236	26.0809	9.99365
115453349	Os03g0390400	LOC_Os03g27290	31.36	1	5	5	16	169	18.9008	4.29736
115436224	Os01g0314100	LOC_Os01g21160	31.36	1	13	13	32	523	56.6414	7.09326
115477777	Os08g0557400	LOC_Os08g44320	31.34	1	7	7	33	268	28.7855	8.54346
115473743	Os07g0647500	LOC_Os07g45320	31.34	1	1	2	13	67	7.61601	9.81787
115444403	Os02g0162000	LOC_Os02g06650	31.34	1	1	2	10	67	7.64599	9.90576
115487356	Os12g0150100	LOC_Os12g05430	31.33	2	3	6	29	150	16.9203	11.0044
115484519	Os11g0186200	LOC_Os11g08300	31.33	1	15	15	35	482	52.4808	8.17725
115465767	Os05g0589600	LOC_Os05g51180	31.33	2	10	13	27	383	41.0044	6.06201
115460988	Os04g0650800	LOC_Os04g55720	31.32	1	15	18	60	613	63.9251	7.31299
115468120	Os06g0484500	LOC_Os06g28950	31.31	1	4	4	10	214	22.0337	10.0815
115479679	Os09g0469400	LOC_Os09g29404	31.3	1	9	9	18	377	43.365	6.48096
115436526	Os01g0360600	---	31.3	1	7	7	17	230	25.6558	8.26514
115472943	Os07g0573800	LOC_Os07g38620	31.29	1	11	11	40	342	36.895	8.646
115463087	Os05g0304600	LOC_Os05g23880	31.29	1	20	20	36	847	95.2835	7.59131
115474037	Os07g0674700	LOC_Os07g47780	31.28	1	3	5	7	195	21.9351	11.3999
115447545	Os02g0641800	LOC_Os02g42860	31.26	1	3	13	37	483	55.0505	8.49951
115452513	Os03g0300400	LOC_Os03g18850	31.25	1	5	5	8	160	17.1627	6.27783
115442003	Os01g0929100	LOC_Os01g70400	31.25	1	5	5	13	176	20.4627	4.51318
297604274	Os05g0323800	LOC_Os05g25840	31.22	1	12	12	19	426	47.9552	5.23682
115483755	Os11g0106400	LOC_Os11g01510/LOC_Os12g01520	31.2	2	17	36	119	1048	117.047	5.37646
115481356	Os10g0189100	LOC_Os10g11140	31.2	1	15	15	73	609	66.0717	6.68311
297612273	Os11g0644600	LOC_Os11g42490	31.14	1	6	6	13	167	18.8306	8.01611
115439385	Os01g0698000	LOC_Os01g50310	31.12	1	11	11	33	347	35.9802	4.85596
115480697	Os09g0564000	LOC_Os09g39060	31.1	1	7	7	41	283	30.4531	5.2749
115478909	Os09g0378300	LOC_Os09g21110	31.08	1	12	30	68	1094	123.38	6.78564
11466785	rps14	---	31.07	1	3	3	14	103	12.2468	11.4585
115465205	Os05g0543200	LOC_Os05g46560	31.07	1	14	14	29	544	59.599	4.61475
115475838	Os08g0314800	LOC_Os08g22354	31.06	1	16	20	49	660	71.5129	7.69385
115468654	Os06g0574500	LOC_Os06g37660	31.05	1	1	8	24	306	35.091	5.021
115436510	Os01g0358100	LOC_Os01g25560	31.03	2	2	3	6	116	11.8369	5.0083
115478150	Os09g0249000	LOC_Os09g07460	31.02	1	8	8	17	332	34.4034	5.19873
115469730	Os06g0698300	LOC_Os06g48300	31.01	1	1	8	19	287	30.6022	4.97021
115447229	Os02g0609400	LOC_Os02g39630	31.01	1	4	4	6	158	17.7334	7.10791
115437452	Os01g0550100	LOC_Os01g36930	31.01	1	13	13	34	474	53.1318	6.16357
297605657	Os06g0300800	LOC_Os06g19660	31	1	23	32	80	1187	129.143	6.12549
115472499	Os07g0530600	LOC_Os07g34640	31	1	13	13	35	471	51.0443	9.02686
115434342	Os01g0132000	LOC_Os01g04050	31	2	4	4	9	100	10.7093	8.33838
297719715	Os01g0197200	LOC_Os01g10050	30.99	1	2	2	3	71	7.46901	9.05615
115461462	Os04g0687100	LOC_Os04g59040	30.99	5	1	7	33	213	24.1783	5.89697
115470411	Os07g0124500	LOC_Os07g03230	30.98	1	19	29	82	936	106.093	5.36377
297725029	Os06g0590301	LOC_Os06g39040	30.97	1	5	5	15	155	17.2298	8.90967
115480107	Os09g0513000	LOC_Os09g33810	30.97	1	11	11	37	352	37.8402	4.62744
115455751	Os03g0784700	LOC_Os03g57120	30.95	1	5	11	40	378	41.852	8.60205
115444449	Os02g0167100	LOC_Os02g07044	30.95	1	9	9	31	336	37.1885	6.01123
115468228	Os06g0503400	LOC_Os06g30750	30.94	1	8	8	30	265	28.5723	7.00537
115480611	Os09g0556500	LOC_Os09g38420	30.93	2	16	18	43	569	63.9061	7.34229
115457664	Os04g0309600	LOC_Os04g24430	30.92	1	21	26	61	844	96.4894	7.84033
115467942	Os06g0342100	LOC_Os06g23430	30.88	1	4	4	10	136	14.913	9.86182
115467096	Os06g0216700	LOC_Os06g11310	30.87	1	4	5	9	149	16.5362	9.29053
115468836	Os06g0604400	LOC_Os06g40190	30.84	3	18	24	49	817	91.2612	7.03467
115468554	Os06g0562600	LOC_Os06g36700	30.84	1	18	18	51	535	59.0936	6.02393
297609531	Os09g0436900	LOC_Os09g26580	30.81	1	5	5	12	172	18.9536	4.93213
297611683	Os11g0303500	LOC_Os11g19810	30.8	1	20	20	49	724	77.5946	9.75928
115458638	Os04g0447800	LOC_Os04g37500	30.8	1	13	16	37	500	55.5947	6.56592
115485031	Os11g0265400	LOC_Os11g16410	30.79	1	7	7	13	328	35.3765	9.33447
297724475	Os06g0149300	LOC_Os06g05650	30.77	1	2	2	3	65	6.25531	10.1255
297598482	Os02g0117600	LOC_Os02g02550	30.77	1	6	6	26	234	24.9299	9.20264
297596251	Os01g0188100	LOC_Os01g09300	30.77	1	2	2	3	65	7.36961	7.1958
115458198	Os04g0403500	LOC_Os04g33060	30.77	1	8	8	22	312	33.2455	7.89893
115471885	Os07g0447800	LOC_Os07g26610	30.76	1	15	15	37	543	58.4392	6.06201
115471207	Os07g0222300	LOC_Os07g12110	30.75	3	4	13	26	439	51.2741	5.8335
115455145	Os03g0733400	LOC_Os03g52310/LOC_Os05g50624	30.75	2	5	18	69	722	80.9242	5.32568
297598814	Os02g0209000	LOC_Os02g11830/LOC_Os02g11840	30.73	1	1	5	13	179	20.8164	8.07471
115433986	Os01g0102700	LOC_Os01g01307	30.73	1	4	4	14	205	22.518	8.82178
115444921	Os02g0203700	LOC_Os02g10920	30.72	1	4	4	7	166	17.4907	8.25049
115454357	Os03g0648400	LOC_Os03g44620	30.7	1	10	16	40	417	46.4558	6.41748
115447985	Os02g0686600	LOC_Os02g46150	30.68	1	11	11	22	352	39.4537	6.3667
115467704	Os06g0300600	LOC_Os06g19640	30.65	1	7	7	11	248	28.2776	9.21729
115467440	Os06g0257200	---	30.65	1	3	3	13	62	7.04859	9.24658
115460598	Os04g0619500	LOC_Os04g52850	30.65	1	9	9	16	323	35.8169	6.22705
115458010	Os04g0382100	LOC_Os04g31320	30.64	1	10	10	23	346	38.9183	9.17334
115470199	Os07g0105600	LOC_Os07g01480	30.63	1	6	6	40	222	24.2134	8.14795
115455623	Os03g0772800	LOC_Os03g56190	30.61	1	2	2	15	98	10.7754	9.43701
115450501	Os03g0129900	LOC_Os03g03770	30.61	1	4	4	9	147	16.6876	9.46631
115451893	Os03g0247000	LOC_Os03g14280	30.6	1	7	7	22	232	24.3125	9.26123
115470551	Os07g0142900	LOC_Os07g04990	30.59	2	10	12	53	376	40.5277	7.04932
115436564	Os01g0367100	LOC_Os01g26920	30.59	1	9	10	30	340	36.7047	8.35303
115444145	Os02g0140300	---	30.57	1	5	5	7	193	20.9476	5.94775
115462237	Os05g0160000	LOC_Os05g06750	30.56	1	1	2	13	72	7.74106	6.34131
115461024	Os04g0654700	LOC_Os04g56070	30.56	1	10	10	26	360	40.0118	5.2749
115466442	Os06g0149900	LOC_Os06g05700	30.55	3	7	9	28	347	37.0221	5.46533
115477150	Os08g0502800	LOC_Os08g39310	30.54	1	9	10	23	406	43.4082	8.76318
297602681	Os04g0411800	LOC_Os04g33590	30.53	1	9	9	17	357	40.0043	6.65381
115448263	Os02g0713400	LOC_Os02g48290	30.51	2	7	7	27	331	34.6545	6.63916
115446947	Os02g0582400	LOC_Os02g37150	30.51	1	6	6	12	236	25.5282	5.40186
297600816	Os03g0308100	LOC_Os03g19510	30.5	1	8	8	30	282	30.3774	8.27979
115444081	Os02g0135800	LOC_Os02g04320	30.49	1	8	8	19	305	33.3483	6.01123
115456167	Os03g0815400	LOC_Os03g60100	30.48	1	7	7	17	210	22.9473	11.063
115442143	Os01g0939700	LOC_Os01g71300	30.48	1	9	9	38	292	32.161	7.78174
115440829	Os01g0830100	LOC_Os01g61410	30.48	2	13	13	31	456	49.4777	8.57275
194033213	orf25	---	30.46	1	7	7	20	197	22.2649	8.92432
115478256	Os09g0267600	LOC_Os09g09480	30.45	1	5	7	10	220	24.3245	4.85596
115456435	Os03g0835400	LOC_Os03g61920	30.45	1	8	8	12	358	37.3294	6.55127
115469590	Os06g0684000	LOC_Os06g47000	30.44	1	19	21	51	588	65.6701	7.00537
115457356	Os04g0224900	LOC_Os04g14790	30.42	1	9	9	21	378	41.5592	7.76709
115459462	Os04g0519900	LOC_Os04g43916	30.41	1	6	6	8	217	24.0932	6.354
115434198	Os01g0118000	LOC_Os01g02880	30.41	1	11	12	104	388	41.9677	8.6167
115485699	Os11g0525600	LOC_Os11g32260	30.39	1	30	30	98	1020	114.086	6.30322
115439267	Os01g0687500	LOC_Os01g49330	30.39	1	10	10	26	362	38.6664	8.32373
297719749	Os01g0221400	LOC_Os01g12190	30.38	1	2	2	4	79	8.76217	7.34229
115456323	Os03g0826200	LOC_Os03g61090	30.38	1	1	1	20	79	8.31143	12.3081
115452149	Os03g0268900	LOC_Os03g16210	30.37	1	6	8	15	270	28.6346	7.31299
115446795	Os02g0567100	LOC_Os02g35900	30.37	1	6	6	20	214	23.1936	5.45264
115482796	Os10g0502400	LOC_Os10g35840	30.35	1	17	17	37	537	58.3824	8.55811
115473823	Os07g0657200	LOC_Os07g46370	30.35	1	29	29	95	1127	121.67	5.35107
115446997	Os02g0589000	LOC_Os02g37654	30.34	1	10	10	25	435	48.9868	6.48096
115474835	Os08g0154300	LOC_Os08g05830	30.33	1	10	10	23	399	42.9923	5.31299
115451343	Os03g0197400	LOC_Os03g10120	30.33	1	10	10	16	399	45.2984	5.10986
297599862	Os02g0725100	LOC_Os02g49320	30.32	1	13	13	51	432	46.616	6.48096
115434220	Os01g0120500	LOC_Os01g03040	30.31	1	6	6	12	254	27.5208	10.1255
115452963	Os03g0344100	---	30.3	1	3	8	19	264	29.7639	10.0669
115469390	Os06g0663800	LOC_Os06g45340	30.28	1	6	6	55	218	21.9816	9.24658
115435108	Os01g0199900	LOC_Os01g10280	30.27	2	18	18	48	631	68.3883	7.10791
115476990	Os08g0485900	LOC_Os08g37940	30.25	1	9	9	32	324	34.8167	6.96143
115439111	Os01g0673800	LOC_Os01g48300	30.23	1	8	8	20	311	33.728	8.51416
115455793	Os03g0787300	LOC_Os03g57340	30.22	1	10	15	58	417	46.6607	6.18896
115452067	Os03g0263500	LOC_Os03g15700	30.22	1	10	10	22	321	35.6321	9.64209
115475836	Os08g0313200	LOC_Os08g22149	30.21	1	8	8	15	235	25.1233	7.50342
115461232	Os04g0670800	LOC_Os04g57520	30.21	1	9	9	13	331	37.6469	5.41455
115446359	Os02g0516800	LOC_Os02g31160	30.21	1	7	12	25	374	39.5269	5.24951
297606786	Os07g0167000	LOC_Os07g07250	30.2	2	4	12	23	404	47.1418	5.88428
115480345	Os09g0533100	LOC_Os09g36270	30.2	1	22	22	58	755	83.3545	5.94775
115460528	Os04g0614700	---	30.12	1	6	6	10	166	18.9159	5.46533
115451853	Os03g0243300	LOC_Os03g13970	30.1	1	11	11	45	402	42.3568	4.64014
115441759	Os01g0911200	LOC_Os01g68324	30.09	1	20	20	52	698	75.1599	6.59521
115474471	Os08g0112600	LOC_Os08g02060	30.07	1	4	4	8	143	16.4152	5.71924
115456523	Os03g0843300	LOC_Os03g62620	30.06	2	11	11	27	316	34.7769	5.05908
115447527	Os02g0639900	LOC_Os02g42700	30.06	1	4	5	17	173	18.5777	8.99756
115438572	Os01g0615200	LOC_Os01g42870	30.04	1	9	10	31	446	46.4687	5.12256
115462147	Os05g0151400	LOC_Os05g05950	30.02	1	31	31	101	1306	139.874	4.4751
115447427	Os02g0629800	LOC_Os02g41904	30	1	2	2	2	80	8.77823	8.70459
115440763	Os01g0823600	LOC_Os01g60830	30	1	4	4	10	170	19.2236	8.93896
115456173	Os03g0815900	LOC_Os03g60130	29.97	2	12	12	22	367	41.1881	9.26123
297726219	Os08g0249966	---	29.95	1	2	6	12	197	21.6779	5.09717
115457482	Os04g0270100	LOC_Os04g20220	29.95	2	15	15	58	444	49.7299	7.04932
115467430	Os06g0256200	LOC_Os06g14470	29.93	1	8	8	14	294	31.7981	10.9751
115452761	Os03g0324800	LOC_Os03g20860	29.91	1	6	6	10	214	23.8742	8.98291
115484191	Os11g0150100	LOC_Os11g05260	29.9	1	12	12	51	495	54.1914	6.27783
115477865	Os08g0564100	LOC_Os08g45010	29.9	1	11	16	51	592	66.1307	6.59521
297720489	Os01g0800266	LOC_Os01g58610	29.87	1	9	14	177	385	39.8636	8.88037
297598910	Os02g0246300	LOC_Os02g14860	29.85	1	4	4	6	134	15.0851	9.37842
115435716	Os01g0254100	LOC_Os01g15020	29.85	1	24	30	67	1129	125.016	7.18115
115444199	Os02g0146700	LOC_Os02g05340	29.84	1	10	24	60	898	98.0954	5.21143
115447085	Os02g0596500	LOC_Os02g38300	29.82	2	7	9	15	228	25.4523	4.70361
115482366	Os10g0461100	---	29.8	4	20	20	83	537	59.5109	9.37842
115446671	Os02g0554100	LOC_Os02g34860	29.8	1	5	13	40	453	48.2406	5.70654
297601407	Os03g0654600	LOC_Os03g45194	29.79	1	1	1	2	47	5.431	10.272
115470719	Os07g0164200	LOC_Os07g06990	29.79	1	4	4	8	141	14.2063	9.40771
115480309	Os09g0530300	---	29.78	1	13	13	31	507	54.7851	9.12939
115463119	Os05g0310800	---	29.77	2	3	15	45	524	57.4704	5.74463
115434738	Os01g0168200	LOC_Os01g07376	29.77	1	3	5	7	131	14.5561	5.021
297597102	Os01g0589800	LOC_Os01g40710	29.74	1	5	5	43	195	20.4597	9.53955
115458652	Os04g0448900	LOC_Os04g37619	29.74	1	21	21	54	659	71.7535	7.91357
115463023	Os05g0295300	LOC_Os05g22940	29.73	1	5	6	19	185	21.2089	6.81494
297598507	Os02g0123300	---	29.72	1	3	13	40	397	44.3092	9.30518
115444643	Os02g0182800	LOC_Os02g08544	29.72	2	5	7	19	212	24.1019	5.85889
297595990	Os01g0120300	LOC_Os01g03020	29.71	1	4	4	8	138	15.7232	8.11865
115476472	Os08g0424200	---	29.68	2	10	10	19	310	33.6161	7.66455
297724109	Os05g0402850	---	29.67	1	6	6	14	182	20.6167	9.27588
115442597	Os01g0978400	LOC_Os01g74660	29.66	1	7	7	16	327	35.1332	5.84619
115488306	Os12g0409000	LOC_Os12g22030	29.65	2	10	11	34	462	50.7034	7.69385
115463777	Os05g0401300	LOC_Os05g33300	29.64	1	8	8	14	253	27.114	8.76318
115463121	Os05g0311000	LOC_Os05g24601	29.64	2	3	15	48	523	57.4664	5.85889
115453511	Os03g0412800	LOC_Os03g29950	29.64	2	13	17	50	577	64.8001	8.33838
115453029	Os03g0351200	LOC_Os03g22780	29.63	1	10	10	29	405	43.2402	7.07861
297598193	Os01g0917400	LOC_Os01g68860	29.61	1	11	11	29	439	47.8207	8.5874
297612783	Os12g0182200	LOC_Os12g08170	29.55	1	9	10	29	467	48.3302	8.77783
297602621	Os04g0391900	LOC_Os04g32150	29.54	1	10	10	27	369	40.8179	8.55811
115448731	Os02g0753300	LOC_Os02g51710	29.53	1	3	4	11	193	19.9728	6.66846
115484479	Os11g0181700	LOC_Os11g07922	29.52	1	7	8	34	332	36.4829	9.29053
115440569	Os01g0805800	LOC_Os01g59140	29.52	2	6	6	9	210	24.8903	9.48096
115438228	Os01g0600000	LOC_Os01g41610	29.51	1	4	4	27	122	14.0003	9.18799
115456241	Os03g0820600	---	29.5	3	5	5	15	139	15.936	6.03662
115435726	Os01g0255000	LOC_Os01g15120	29.5	2	6	8	28	322	35.508	6.31592
297610489	Os10g0419100	LOC_Os10g28320	29.49	1	9	10	18	373	40.9123	6.87354
115476564	Os08g0434300	LOC_Os08g33720	29.49	1	3	10	35	356	37.4128	6.69775
115448809	Os02g0759800	LOC_Os02g52250	29.49	1	16	16	40	607	67.4382	9.17334
115465543	Os05g0571100	LOC_Os05g49610	29.47	1	13	14	26	509	58.1327	9.14404
115435650	Os01g0248400	LOC_Os01g14580	29.47	1	5	12	39	414	46.5408	6.87354
297613482	Os12g0600400	LOC_Os12g40830	29.45	1	10	10	24	309	34.0389	6.30322
115444503	Os02g0171100	LOC_Os02g07490	29.44	2	8	11	55	411	43.2902	8.90967
297601723	Os03g0760200	LOC_Os03g55240	29.43	2	14	14	32	513	56.5754	8.11865
115489834	Os12g0641500	---	29.43	1	17	17	28	632	72.9495	5.73193
297724581	Os06g0198800	LOC_Os06g09850	29.41	1	3	3	4	68	8.05915	8.49951
297606944	Os07g0237100	LOC_Os07g13280	29.41	1	8	8	31	204	21.3239	8.77783
115455573	Os03g0767500	LOC_Os03g55820	29.39	1	7	7	31	262	28.5543	5.5542
115439723	Os01g0730300	LOC_Os01g53000	29.38	3	15	20	29	878	99.3294	5.77002
297610719	Os10g0495300	LOC_Os10g35250	29.36	1	25	25	42	923	101.817	7.12256
115477453	Os08g0530000	LOC_Os08g41790	29.33	1	4	12	23	491	54.4126	6.44287
115444107	Os02g0137800	LOC_Os02g04520	29.33	1	4	4	5	150	16.8472	5.42725
115473377	Os07g0618500	LOC_Os07g42632	29.32	1	14	14	24	532	58.0103	8.14795
115458104	Os04g0394200	LOC_Os04g32330	29.32	1	9	12	82	440	48.2532	8.63135
115452343	Os03g0286200	LOC_Os03g17730	29.32	1	5	10	25	399	42.9468	7.03467
115447129	Os02g0600200	LOC_Os02g38820	29.32	1	7	7	26	266	29.7527	9.84717
115459058	Os04g0485000	LOC_Os04g40850	29.31	1	4	11	24	389	44.0568	5.92236
115483126	Os10g0533600	LOC_Os10g38950	29.26	15	7	10	35	376	42.7456	6.40479
297599090	Os02g0313500	LOC_Os02g20940	29.25	1	3	3	6	106	11.9047	7.78174
115487824	Os12g0210300	LOC_Os12g10730	29.25	1	6	6	19	212	23.6194	6.78564
115486477	Os11g0653300	LOC_Os11g43250	29.25	3	25	25	55	848	96.4427	8.83643
115441929	Os01g0924000	LOC_Os01g69950	29.23	1	6	6	34	195	21.255	10.0229
297599503	Os02g0589400	LOC_Os02g37690	29.22	4	11	12	51	421	44.8079	6.58057
115448027	Os02g0690700	LOC_Os02g46510	29.22	1	13	13	19	438	49.2386	9.24658
115473047	Os07g0585000	LOC_Os07g39620	29.21	1	10	11	27	445	46.0245	4.66553
115465888	Os06g0103600	LOC_Os06g01400	29.21	1	30	30	80	1068	119.09	5.97314
115434740	Os01g0168300	LOC_Os01g07382	29.21	1	13	13	23	380	41.91	9.65674
115465395	Os05g0558900	LOC_Os05g48510	29.19	1	18	18	36	596	67.3695	6.01123
115447185	Os02g0605600	LOC_Os02g39300	29.19	1	11	13	19	418	48.9937	8.6167
115445077	Os02g0220600	LOC_Os02g12800	29.19	1	3	12	88	418	47.448	6.46826
115453457	Os03g0405500	LOC_Os03g29190	29.17	1	13	15	26	569	63.2487	5.05908
115450074	Os02g0833900	LOC_Os02g58720	29.17	9	5	6	16	288	30.3711	7.44482
115476250	Os08g0390000	LOC_Os08g30060	29.15	1	16	16	31	621	69.2702	8.71924
115445531	Os02g0276500	LOC_Os02g17650	29.15	1	13	13	38	470	52.1616	7.23975
115434960	Os01g0185200	LOC_Os01g09000	29.15	1	15	24	70	796	89.8471	6.55127
115467076	Os06g0215300	LOC_Os06g11180	29.14	1	16	19	44	683	75.4357	5.51611
115454745	Os03g0694900	LOC_Os03g48850	29.13	3	28	29	67	1054	119.588	6.75635
297596656	Os01g0321300	LOC_Os01g21820	29.11	1	2	2	4	79	8.74562	5.31299
115475922	Os08g0327400	LOC_Os08g23810	29.07	1	6	10	54	375	39.1061	8.67529
115457062	Os04g0165300	LOC_Os04g08310	29.07	1	7	7	13	258	27.621	4.85596
297723949	Os05g0310500	LOC_Os05g24550	29.06	1	5	5	9	234	25.9659	5.38916
115473063	Os07g0586500	LOC_Os07g39780	29.06	1	12	12	29	406	45.3253	6.60986
115466562	Os06g0160600	LOC_Os06g06550	29.06	1	15	15	38	468	50.8755	8.1333
115482018	Os10g0415600	LOC_Os10g28020	29.03	1	22	22	76	775	84.8868	6.12549
115470657	Os07g0158300	LOC_Os07g06450	29.02	1	8	9	38	348	37.5765	4.64014
115436512	Os01g0358300	LOC_Os01g25600	29.01	1	13	13	25	455	49.7122	9.23193
115476544	Os08g0432500	LOC_Os08g33540	29.01	1	5	5	10	162	17.4829	9.0415
297727787	Os10g0542800	LOC_Os10g39670	28.99	1	4	6	12	238	26.8446	7.45947
115484331	Os11g0162200	LOC_Os11g06340	28.99	1	2	2	5	69	8.222	7.13721
115436768	Os01g0500900	LOC_Os01g31610	28.97	1	13	13	32	497	54.5243	7.10791
115449339	Os02g0805600	LOC_Os02g56180	28.96	1	10	10	40	328	34.3071	6.15088
297609759	Os09g0503400	LOC_Os09g32650	28.95	2	12	30	75	1095	123.544	6.56592
115445513	Os02g0274100	LOC_Os02g17390	28.93	1	19	19	41	726	78.4103	8.98291
115467290	Os06g0236900	LOC_Os06g12990	28.92	1	2	2	4	83	9.41373	4.52588
115478915	Os09g0379900	LOC_Os09g21210	28.9	1	15	15	40	692	75.9729	6.20166
297600120	Os02g0816500	---	28.89	1	3	3	5	90	10.2923	7.94287
115439033	Os01g0665400	LOC_Os01g47550	28.88	1	10	10	23	367	37.1413	5.19873
297720551	Os01g0834601	LOC_Os01g61814	28.87	2	5	5	27	142	15.6506	10.4331
115454693	Os03g0689300	LOC_Os03g48310	28.87	2	2	26	135	956	105.289	6.81494
115451647	Os03g0223400	LOC_Os03g12290	28.85	1	7	9	36	357	39.2337	6.07471
11466819	petB	---	28.84	1	5	5	83	215	24.1666	8.76318
115448157	Os02g0704000	LOC_Os02g47510	28.84	1	15	15	48	638	68.5764	6.53662
115439749	Os01g0732200	LOC_Os01g53150	28.8	1	7	7	13	316	35.1413	9.21729
115461434	Os04g0685300	LOC_Os04g58850	28.78	1	4	4	14	205	22.1925	8.85107
115481904	Os10g0400800	LOC_Os10g26130	28.77	1	16	16	32	504	56.9803	6.43018
115448169	Os02g0705000	LOC_Os02g47610	28.76	1	7	7	9	306	34.2438	6.63916
297728629	Os11g0644750	LOC_Os11g42500	28.75	1	3	3	9	160	16.5925	6.27783
115477046	Os08g0492100	LOC_Os08g38410	28.73	1	8	8	14	362	38.1024	9.23193
115469272	Os06g0652400	LOC_Os06g44270	28.66	1	9	9	24	328	35.6925	7.13721
297603595	Os04g0684200	LOC_Os04g58750	28.64	3	10	10	24	405	45.3453	5.97314
115489478	Os12g0605800	LOC_Os12g41250	28.63	1	17	17	47	737	80.2338	6.80029
115450603	Os03g0137500	LOC_Os03g04460	28.62	1	7	7	16	276	29.6653	8.32373
297610993	Os10g0575700	LOC_Os10g42500	28.61	1	9	9	57	409	44.0961	4.53857
115472009	Os07g0470700	LOC_Os07g28790	28.61	1	12	12	31	402	43.2958	9.05615
115451029	Os03g0171900	LOC_Os03g07570	28.6	2	13	13	35	486	52.69	8.27979
297720157	Os01g0589100	LOC_Os01g40650	28.57	1	3	3	5	77	8.63244	7.41553
115486387	Os11g0638000	LOC_Os11g41910	28.57	2	8	8	13	315	35.0384	9.5835
115463957	Os05g0420600	LOC_Os05g34770	28.57	1	3	3	8	112	12.2632	9.31982
115459066	Os04g0485400	LOC_Os04g40880	28.57	1	1	1	1	63	6.26281	4.64014
115453913	Os03g0581800	LOC_Os03g38520	28.57	1	3	3	6	91	9.61491	9.70068
115435742	Os01g0256900	LOC_Os01g15310	28.57	1	5	5	9	147	15.718	9.99365
115446743	Os02g0562300	LOC_Os02g35470	28.53	1	8	17	29	652	72.0606	6.97607
297609803	Os09g0514600	LOC_Os09g33950	28.48	1	4	4	14	158	17.1351	7.37158
115452095	Os03g0265400	LOC_Os03g15870	28.48	1	9	9	36	323	34.4997	6.37939
115449577	Os02g0815200	LOC_Os02g57010	28.48	1	8	8	22	316	34.5901	5.26221
115472061	Os07g0477500	LOC_Os07g29450	28.46	1	23	23	41	794	89.6393	7.48877
115470072	Os06g0727200	LOC_Os06g51150	28.46	1	7	13	71	492	56.551	6.96143
297611333	Os11g0174000	LOC_Os11g07280	28.44	1	22	24	64	953	105.372	5.87158
297597208	Os01g0617900	LOC_Os01g43070	28.44	1	8	8	42	327	35.9303	9.51025
115475740	Os08g0292600	LOC_Os08g19610	28.44	1	10	10	33	327	35.8653	7.51807
115453197	Os03g0370500	LOC_Os03g25450	28.43	2	5	15	27	591	64.7681	9.23193
115435928	Os01g0275600	LOC_Os01g16870	28.43	2	22	25	57	904	100.576	8.96826
115476306	Os08g0399600	---	28.42	1	12	12	25	366	39.9886	8.36768
297597412	Os01g0692300	LOC_Os01g49740	28.41	3	19	19	32	609	68.0756	9.43701
115469122	Os06g0639500	LOC_Os06g43270	28.41	1	17	17	34	630	70.9179	6.53662
115444457	Os02g0167700	LOC_Os02g07120	28.41	2	35	35	87	1218	134.188	6.11279
115452559	Os03g0305100	LOC_Os03g19250	28.4	1	12	14	29	574	62.6548	7.63525
115434690	Os01g0164600	LOC_Os01g07090	28.4	1	9	9	31	331	35.4037	5.07178
297600820	Os03g0309200	LOC_Os03g19590	28.39	1	26	28	62	1120	124.128	6.20166
115481496	Os10g0321700	LOC_Os10g17454	28.39	1	7	7	23	317	32.2247	4.77979
115442487	Os01g0969100	LOC_Os01g73790	28.39	1	11	11	16	398	44.3044	6.25244
297599986	Os02g0774100	LOC_Os02g53400	28.34	1	6	6	19	187	20.5205	9.0708
115488088	Os12g0265100	LOC_Os12g16410	28.34	1	5	8	15	314	35.0308	6.18896
115467738	Os06g0305200	LOC_Os06g20090	28.34	2	37	37	72	1475	160.945	6.22705
115459412	Os04g0514400	LOC_Os04g43420	28.34	1	10	10	28	367	39.9462	5.22412
115440863	Os01g0833200	LOC_Os01g61670	28.34	1	4	4	10	187	20.6464	6.72705
115474751	Os08g0141300	LOC_Os08g04620	28.33	1	7	8	16	233	25.6216	9.53955
115461591	Os05g0103500	LOC_Os05g01300	28.33	1	5	5	19	180	20.5527	9.11475
115435496	Os01g0232700	LOC_Os01g13190	28.33	1	12	12	30	473	50.5339	6.46826
115446953	Os02g0582900	LOC_Os02g37190	28.32	1	3	3	4	113	11.9741	4.70361
115444513	Os02g0173100	LOC_Os02g07680	28.32	2	9	9	19	286	32.3369	7.43018
297721821	Os03g0157600	---	28.3	1	5	5	10	212	22.5933	6.43018
115465349	Os05g0555600	LOC_Os05g48200	28.3	1	10	16	33	643	71.2622	5.96045
115479931	Os09g0497400	LOC_Os09g32220	28.29	1	6	6	21	251	28.2546	9.18799
115469168	Os06g0644100	LOC_Os06g43650	28.29	1	7	7	13	205	22.3297	9.48096
115452325	Os03g0284600	LOC_Os03g17600	28.29	1	8	8	23	251	26.7688	8.29443
115445503	Os02g0273100	LOC_Os02g17330	28.28	1	11	11	37	389	41.5311	7.43018
115464421	Os05g0470800	LOC_Os05g39390	28.27	1	14	14	31	520	56.3338	5.90967
115454281	Os03g0640100	LOC_Os03g43890	28.27	1	9	9	24	428	48.3296	4.93213
297724719	Os06g0286351	LOC_Os06g17840	28.25	1	43	43	128	1561	174.658	6.62451
115452305	Os03g0283300	LOC_Os03g17490	28.25	1	7	7	20	177	18.2531	9.39307
115450011	Os02g0829500	---	28.22	1	5	8	17	326	36.5033	6.87354
297728005	Os11g0161033	---	28.21	1	1	2	5	78	8.49533	8.79248
115467904	Os06g0334400	LOC_Os06g22820	28.18	1	12	12	20	479	52.0404	4.77979
297728551	Os11g0599200	LOC_Os11g38650	28.16	1	13	13	28	490	52.5009	6.15088
297604030	Os05g0200100	LOC_Os05g11090	28.14	1	6	6	20	231	25.4409	8.68994
115488612	Os12g0489100	LOC_Os12g30540	28.13	1	6	18	41	551	64.0703	5.16064
115473033	Os07g0583600	LOC_Os07g39470	28.13	2	13	13	23	544	60.0701	6.45557
115466182	Os06g0130500	LOC_Os06g04000	28.13	1	4	4	8	160	17.5057	8.30908
115459270	Os04g0502300	LOC_Os04g42380	28.13	1	1	6	23	160	17.9898	10.5796
115473645	Os07g0640200	LOC_Os07g44660	28.11	1	12	12	29	562	61.7533	5.60498
115450707	Os03g0146000	LOC_Os03g05280	28.1	1	6	6	9	210	23.2459	7.29834
115462479	Os05g0188100	LOC_Os05g09580	28.09	1	3	3	13	89	9.08427	8.39697
115474927	Os08g0162600	LOC_Os08g06530	28.08	1	7	7	50	260	27.4685	9.78857
115462195	Os05g0156500	LOC_Os05g06440	28.08	1	5	5	13	146	16.6457	7.56201
115460918	Os04g0644600	LOC_Os04g55180	28.06	1	8	8	39	392	42.5804	7.6792
115455173	Os03g0735300	LOC_Os03g52490	28.04	1	7	8	24	296	32.4979	9.94971
115461096	Os04g0661300	LOC_Os04g56590	28.03	1	8	8	26	346	40.2316	6.12549
115448655	Os02g0745000	LOC_Os02g51100	28.03	1	7	7	20	264	29.2975	5.80811
115481774	Os10g0378300	LOC_Os10g23204	28	1	4	4	13	175	18.5351	9.0415
297608836	Os08g0511900	LOC_Os08g40110	27.97	1	3	3	8	118	13.1878	6.55127
115448083	Os02g0697600	LOC_Os02g46990	27.97	1	16	19	34	640	71.2242	9.39307
115450531	Os03g0131900	LOC_Os03g03990	27.94	1	10	10	39	383	41.57	4.7417
115448237	Os02g0710900	LOC_Os02g48110	27.94	1	26	26	64	902	99.3093	5.40186
297600518	Os03g0206700	LOC_Os03g10880	27.93	3	10	11	30	444	48.3165	5.49072
115481814	Os10g0389200	LOC_Os10g25020	27.92	2	7	7	18	265	29.04	5.2876
115468746	Os06g0591600	LOC_Os06g39140	27.91	1	5	5	12	172	19.5394	6.72705
115484729	Os11g0216100	LOC_Os11g10990	27.89	1	5	5	8	251	27.9342	7.98682
115480453	Os09g0542200	LOC_Os09g37020	27.85	1	5	5	15	237	25.8531	8.55811
115470697	Os07g0162400	LOC_Os07g06830	27.83	3	8	8	18	327	36.0138	5.45264
115458608	Os04g0445700	LOC_Os04g36800	27.83	1	6	10	23	442	46.8414	6.07471
115467250	Os06g0232000	LOC_Os06g12580	27.82	1	10	10	32	381	41.6382	5.16064
115434736	Os01g0168100	LOC_Os01g07370	27.82	2	16	16	40	593	67.626	5.24951
115486263	Os11g0615200	LOC_Os11g40100	27.8	2	4	4	17	205	21.5966	5.05908
115487650	Os12g0180400	LOC_Os12g07980	27.78	2	2	2	4	72	8.23715	5.32568
115471449	Os07g0260300	LOC_Os07g15670	27.78	1	5	5	15	252	27.6672	9.43701
115448821	Os02g0760500	LOC_Os02g52314	27.78	1	5	5	14	162	17.21	6.75635
115481768	Os10g0377800	LOC_Os10g23120	27.74	1	14	14	34	548	60.4399	8.01611
297603370	Os04g0620000	LOC_Os04g52900	27.73	1	6	6	13	220	24.8235	5.49072
115450561	Os03g0134300	LOC_Os03g04169	27.72	1	9	9	28	404	43.8817	6.7417
115487958	Os12g0236900	LOC_Os12g13460	27.7	1	12	12	41	509	56.4899	5.59229
115486243	Os11g0610900	LOC_Os11g39670	27.7	1	11	11	30	509	55.7205	6.18896
11466779	rpoC2	---	27.69	3	39	39	79	1513	173.706	7.29834
297722313	Os03g0595800	LOC_Os03g39860	27.69	1	2	2	2	65	7.16943	4.29736
115456147	Os03g0811700	LOC_Os03g59710	27.69	1	3	3	8	130	14.7017	9.49561
115450076	Os02g0834000	LOC_Os02g58730	27.69	6	4	5	9	195	21.3923	9.21729
115471453	Os07g0262200	LOC_Os07g15880	27.68	1	3	7	48	289	31.9352	9.77393
115449131	Os02g0787800	LOC_Os02g54650	27.66	1	14	14	32	488	53.9434	6.72705
115483130	Os10g0533900	LOC_Os10g38970	27.64	1	5	5	9	246	27.2043	6.97607
115444957	Os02g0208200	LOC_Os02g11750	27.62	1	3	3	6	105	11.974	4.85596
297608991	Os08g0557500	LOC_Os08g44330	27.61	1	5	5	11	163	18.6033	8.06006
115488252	Os12g0297500	LOC_Os12g20150	27.61	1	29	29	55	1206	132.813	5.78271
115455973	Os03g0800700	LOC_Os03g58630	27.61	1	4	4	16	134	14.7863	5.97314
115481896	Os10g0400100	LOC_Os10g26050	27.6	1	13	15	39	605	68.177	6.01123
297722003	Os03g0279950	LOC_Os03g17174	27.59	1	7	7	25	232	25.6099	7.81104
115465347	Os05g0555300	LOC_Os05g48160	27.57	1	4	4	14	185	19.4839	9.27588
115460926	Os04g0645100	LOC_Os04g55230	27.56	4	33	35	86	1201	132.734	7.10791
115480363	Os09g0534800	LOC_Os09g36440	27.56	2	9	9	13	312	34.2762	6.27783
115452081	Os03g0264400	LOC_Os03g15780	27.56	1	14	17	39	606	66.9459	7.12256
115437816	Os01g0575000	LOC_Os01g39310	27.54	3	25	25	47	806	90.4212	6.15088
115472289	Os07g0508200	LOC_Os07g32450	27.53	1	9	9	15	356	39.0918	7.26904
115446499	Os02g0533200	LOC_Os02g33020	27.53	1	8	8	18	287	31.4662	9.0415
115487090	Os12g0123500	LOC_Os11g03230/LOC_Os12g02980	27.49	4	9	11	20	451	48.8701	7.95752
115458736	Os04g0456700	---	27.46	1	3	4	32	193	20.5239	4.97021
297727957	Os11g0140700	---	27.45	1	1	1	1	51	5.6941	6.58057
115488928	Os12g0540900	---	27.45	1	11	11	28	408	46.2445	5.89697
115470060	Os06g0726400	---	27.44	1	22	22	43	820	93.1768	6.82959
115457974	Os04g0378200	LOC_Os04g30910	27.44	1	6	6	15	215	23.8514	10.0229
297725241	Os06g0704200	LOC_Os06g49070	27.43	1	3	3	4	113	11.7852	9.15869
115466684	Os06g0172600	---	27.42	2	2	2	3	62	6.92689	12.0298
297605789	Os06g0356800	LOC_Os06g25010	27.42	1	6	6	12	248	27.2557	6.84424
115473049	Os07g0585100	LOC_Os07g39630	27.38	1	9	9	15	336	38.7702	8.63135
115460666	Os04g0624600	LOC_Os04g53310	27.38	1	29	29	81	1216	138.118	5.61768
115446877	Os02g0576700	LOC_Os02g36710	27.38	1	6	7	22	252	28.5708	4.32275
115437648	Os01g0560000	LOC_Os01g37960	27.38	1	11	11	32	442	47.105	6.03662
115452075	Os03g0263900	LOC_Os03g15740	27.36	1	23	23	59	848	92.3709	6.55127
115482746	Os10g0498200	LOC_Os10g35520	27.36	1	5	9	25	318	35.8562	5.51611
297599573	Os02g0608600	LOC_Os02g39570	27.35	1	7	8	21	340	37.3997	5.50342
115471065	Os07g0201100	LOC_Os07g10150	27.33	1	15	24	55	889	98.4918	5.10986
115453079	Os03g0356700	LOC_Os03g24220	27.33	1	22	22	46	966	106.054	5.8208
115477595	Os08g0542600	LOC_Os08g42950	27.27	1	7	7	12	308	33.243	6.29053
115455739	Os03g0784000	---	27.23	1	11	11	17	382	40.8305	7.57666
115470599	Os07g0150100	LOC_Os07g05570	27.22	1	19	19	60	731	82.0621	9.29053
115435442	Os01g0228600	---	27.22	1	10	10	39	316	34.1868	6.18896
115446509	Os02g0534400	LOC_Os02g33110	27.21	2	14	14	53	577	63.9437	8.20654
115439055	Os01g0667200	LOC_Os01g47690	27.21	1	6	6	18	305	33.1562	8.01611
115460428	Os04g0608500	LOC_Os04g51910	27.2	1	3	11	40	478	52.0776	5.64307
115454811	Os03g0701900	LOC_Os03g49520	27.2	1	9	9	13	261	30.2789	9.84717
115472755	Os07g0558500	LOC_Os07g37250	27.18	1	8	8	39	287	32.0795	8.85107
115443599	Os02g0100100	LOC_Os02g01010	27.18	1	15	15	25	563	62.2144	4.93213
115441867	Os01g0919700	LOC_Os01g69060	27.18	1	9	9	34	379	42.3782	7.50342
115441941	Os01g0924800	LOC_Os01g70010	27.16	1	1	8	27	243	27.3243	10.3745
115459212	Os04g0497400	LOC_Os04g42000	27.15	1	5	5	9	221	22.4576	8.96826
115456747	Os03g0860600	LOC_Os03g64280	27.15	2	8	8	11	361	39.2952	6.354
115463767	Os05g0400700	LOC_Os05g33240	27.12	1	4	4	9	177	19.5311	6.52197
115447135	Os02g0601100	LOC_Os02g38900	27.12	1	4	4	5	118	12.8283	4.94482
115482748	Os10g0498300	LOC_Os10g35530	27.11	1	5	9	24	332	36.9525	5.42725
11466824	infA	---	27.1	1	5	5	7	107	12.4096	9.83252
115472801	Os07g0563800	LOC_Os07g37650	27.1	1	12	12	20	476	50.9713	8.82178
115455783	Os03g0786800	LOC_Os03g57290	27.1	1	5	5	6	155	18.2757	8.88037
115462067	Os05g0145600	LOC_Os05g05320	27.09	1	13	13	26	454	50.8815	7.72314
115471279	Os07g0232200	LOC_Os07g12830	27.06	1	5	5	8	218	24.0911	7.95752
115470987	Os07g0191000	LOC_Os07g09330	27.06	1	8	8	16	340	37.0312	7.82568
11466800	ycf4	---	27.03	2	6	6	17	185	21.5805	9.99365
297603603	Os04g0685800	LOC_Os04g58900	27.03	1	4	4	15	222	24.8236	6.23975
115472719	Os07g0555200	LOC_Os07g36940	27.03	2	23	23	50	814	90.776	7.91357
115458632	Os04g0447500	---	27.03	1	7	8	14	333	36.4787	7.72314
115440823	Os01g0829800	LOC_Os01g61380	27.02	1	3	10	35	396	41.7611	7.76709
115487558	Os12g0169800	LOC_Os12g07230	27	1	6	10	23	526	57.9523	5.74463
115473883	Os07g0661700	LOC_Os07g46710	27	1	3	3	6	100	10.9268	6.56592
115447241	Os02g0610600	LOC_Os02g39720	27	2	1	7	37	200	22.7835	11.3267
[truncated: 5,786 more rows]
